# Supplementary material for: Global Transcriptome Analysis of the Peach (Prunus persica) in the Interaction System of Fruit–Chitosan–Monilinia fructicola
Source: Plants (Basel). 2024 Feb 20;13(5):567. doi: 10.3390/plants13050567 (PMC10933875; doi:10.3390/plants13050567)
Supplement: Supplementary file 1 [file plants-13-00567-s001.zip › Tsalgatidou_et_al_2024_Supplementary_Tables_S1-S10.xlsx]

## Sheet: Table S1
TableS1. Summary of peach fruits RNA-seq data
Treatments and time points	Experiment	Total high-quality reads generated	Total reads per biological condition	Total reads mapped to peach genome	%	Reads mapped uniquely to peach genome	%
CT 12 HAI	1	44710232	146110732	42770157	0.9566	41712899	0.933
	2	50999650		47249894	0.9265	46130766	0.9045
	3	50400850		47816655	0.9487	46665287	0.9259
CT 24 HAI	1	81897058	279081618	76570891	0.935	74348487	0.9078
	2	47764566		44412353	0.9298	43188394	0.9042
	3	149419994		139741309	0.9352	135531170	0.907
CT 48 HAI	1	51216104	165098654	48005733	0.9373	47014976	0.918
	2	55362196		53111753	0.9594	51995912	0.9392
	3	58520354		55958953	0.9562	54784047	0.9362
CHI 12 HAI	1	56767008	171874120	53601098	0.9442	52261118	0.9206
	2	72456284		70136178	0.968	68262771	0.9421
	3	42650828		40978818	0.9608	39954455	0.9368
CHI 24 HAI	1	42431312	130160934	41213391	0.9713	40261521	0.9489
	2	42698330		41254721	0.9662	40308669	0.944
	3	45031292		43816368	0.973	42798062	0.9504
CHI 48 HAI	1	51066686	141936516	49387832	0.9671	47944292	0.9389
	2	42546796		41090486	0.9658	39888553	0.9375
	3	48323034		46797619	0.9684	45413049	0.9398
MF 12 HAI	1	56919400	157734658	54999301	0.9663	53858310	0.9462
	2	47995398		46104929	0.9606	45147582	0.9407
	3	52819860		50967774	0.9649	49922179	0.9451
MF 24 HAI	1	43711058	135094562	36765578	0.8411	35893013	0.8211
	2	43545958		36230262	0.832	35416756	0.8133
	3	47837546		40048994	0.8372	39111678	0.8176
MF 48 HAI	1	56596178	170320766	50035916	0.8841	48677448	0.8601
	2	62169780		56215874	0.9042	54738141	0.8805
	3	51554808		46023762	0.8927	44826385	0.8695
MF_CHI 12 HAI	1	52445260	186345588	49734248	0.9483	48513344	0.925
	2	52886044		50925300	0.9629	49573484	0.9374
	3	81014284		77401767	0.9554	75513356	0.9321
MF_CHI 24 HAI	1	45008058	140482784	42747333	0.9498	41795619	0.9286
	2	45705380		42052393	0.9201	41197225	0.9014
	3	49769346		46876969	0.9419	45825108	0.9207
MF_CHI 48 HAI	1	59611046	145686538	55419762	0.9297	54092529	0.9074
	2	43185328		41626156	0.9639	40660421	0.9415
	3	42890164		41453039	0.9665	40497844	0.9442
Average		5.47202e+07		5.13762e+07	0.938642	5.01035e+07	0.915756
Total		1969927470		1849543566		1803724850

## Sheet: Table S2
Table S2: M. fructicola expressed genes and average counts of normalized reads among the three replicates of M. fructicola inoculated peach samples, either individually (MF) or in combination with chitosan (CHI_MF) at three time points (12, 24 and 48 HAI)
	MF			CHI_MF			SeqName	Description
Gene ID	12 HAI	24 HAI	48 HAI	12 HAI	24 HAI	48 HAI
EYC84_001888	238.976	241.687	425.928	46.2751	73.6602	99.8774	scaffold_005.g518.t1	secretory pathway Rab GDP dissociation inhibitor
EYC84_009426	436.955	471.454	555.822	101.418	124.167	99.8193	scaffold_013.g147.t1	glucose-regulated protein
EYC84_008952	607.946	724.716	567.902	148.337	96.2837	98.0279	scaffold_012.g297.t1	histone H2B
EYC84_008013	549.369	330.781	414.453	86.3576	46.3311	97.7684	scaffold_010.g35.t1	AhpC/TSA family protein
EYC84_008963	203.187	155.103	404.441	29.3795	52.229	97.0135	scaffold_012.g308.t1	carbohydrate-binding module family 43 protein
EYC84_011726	218.82	284.534	718.295	33.1664	80.6837	95.0463	scaffold_016.g82.t1	hypothetical protein SS1G_09040
EYC84_011355	397.286	76.6101	422.858	70.4321	31.5607	93.1362	scaffold_015.g234.t1	subtilisin-like protein
EYC84_006432	165.935	151.89	338.037	41.9072	67.7124	92.1285	scaffold_001.g384.t1	UTP-glucose-1-phosphate uridylyltransferase
EYC84_006474	72.9032	69.4379	227.459	0	39.0549	90.3972	scaffold_001.g426.t1	glycoside hydrolase family 17 protein
EYC84_004975	143.466	118.18	314.714	28.0051	43.7063	90.1715	scaffold_003.g6.t1	WSC domain-containing protein
EYC84_002938	530.74	623.114	446.299	98.1052	108.354	87.0097	scaffold_004.g80.t1	ADP/ATP carrier protein
EYC84_004215	535.214	783.884	563.572	110.67	101.892	86.6139	scaffold_002.g355.t1	peptidyl-prolyl cis-trans isomerase
EYC84_008408	108.144	59.5219	327.307	11.0241	22.0532	85.5578	scaffold_010.g430.t1	serine protease
EYC84_006558	211.69	218.694	392.075	57.5332	68.0669	84.6142	scaffold_001.g510.t1	beta-tubulin
EYC84_008990	68.6027	233.719	670.693	13.2793	77.1435	83.3124	scaffold_012.g335.t1	carbohydrate esterase family 12 protein
EYC84_006695	141.335	77.0669	330.537	12.1473	33.3816	82.2759	scaffold_001.g647.t1	glycoside hydrolase family 16 protein
EYC84_000799	574.709	725.914	497.023	113.152	95.4569	78.7856	scaffold_008.g116.t1	putative 60S ribosomal protein L10-A
EYC84_007787	81.7224	70.358	226.267	18.7049	33.9628	76.4021	scaffold_009.g475.t1	GPI anchored serine-rich protein
EYC84_003403	773.163	1087.62	8608.22	140.624	135.902	756.281	scaffold_004.g545.t1	predicted protein
EYC84_007630	780.748	903.096	505.952	133.852	93.3244	74.7185	scaffold_009.g318.t1	60S ribosomal protein L16
EYC84_008874	796.044	1057.96	610.43	125.645	97.7134	74.4778	scaffold_012.g219.t1	ubiquitin-40S ribosomal protein S27a
EYC84_003080	835.157	1003.84	545.892	150.171	117.638	74.2197	scaffold_004.g222.t1	adenosine kinase
EYC84_005877	154.563	119.129	289.786	0	49.5842	74.1788	scaffold_003.g908.t1	GTP-binding protein rhoA
EYC84_006486	13.2818	20.7476	97.1861	0	18.9807	73.8348	scaffold_001.g438.t1	hypothetical protein DID88_005014
EYC84_009693	518.057	551.377	467.19	76.5112	78.2802	73.3505	scaffold_013.g414.t1	histone H3
EYC84_001891	68.4644	64.4856	157.757	13.2684	37.2614	72.0606	scaffold_005.g521.t1	---NA---
EYC84_009913	110.225	60.052	547.72	14.0353	15.3205	70.964	scaffold_011.g64.t1	subtilisin-like protein
EYC84_005047	152.609	136.664	252.757	28.4048	55.0929	70.5343	scaffold_003.g78.t1	tubulin alpha chain
EYC84_009692	526.496	584.421	447.683	71.2277	72.6406	69.6214	scaffold_013.g413.t1	histone 3
EYC84_001168	17.725	14.6172	168.702	0	13.09	69.4491	scaffold_008.g485.t1	multicopper oxidase
EYC84_010709	583.148	819.785	464.049	127.436	88.7357	69.446	scaffold_014.g180.t1	60S ribosomal protein L3
EYC84_002636	704.409	886.027	469.595	136.446	92.0174	69.3714	scaffold_007.g501.t1	60S ribosomal protein L13
EYC84_008290	280.972	116.766	344.174	44.739	33.758	69.2468	scaffold_010.g312.t1	putative serine protease K12H4.7
EYC84_007989	437.914	497.06	389.239	74.1382	74.0513	68.905	scaffold_010.g11.t1	ATP synthase protein 9
EYC84_001668	209.525	156.162	285.522	28.7022	34.0384	68.2155	scaffold_005.g298.t1	GPI-anchored cell wall organization protein Ecm33
EYC84_007363	565.734	686.271	413.341	100.946	95.9221	67.4205	scaffold_009.g51.t1	protein transporter SEC23
EYC84_003566	769.358	962.379	545.749	155.312	93.1884	67.0043	scaffold_004.g708.t1	hypothetical protein AWJ20_1953
EYC84_004429	1325.54	1282.58	3728.36	241.421	516.476	667.695	scaffold_002.g569.t1	hypothetical protein DID88_008788
EYC84_002425	242.306	53.4097	285.163	46.2795	26.6098	66.892	scaffold_007.g290.t1	carboxypeptidase cpdS protein
EYC84_006933	68.3758	42.9653	149.091	0	23.1586	66.637	scaffold_001.g885.t1	cell wall beta-glucan synthesis protein
EYC84_000649	119.414	80.8997	184.604	31.7459	34.2901	65.3371	scaffold_006.g649.t1	hexose transporter
EYC84_008953	351.599	485.723	385.034	66.606	61.5166	65.2394	scaffold_012.g298.t1	Histone H2A
EYC84_011206	765.5	407.166	1835	119.856	229.063	638.852	scaffold_015.g85.t1	binding protein
EYC84_010712	201.246	183.848	276.648	15.7857	52.4502	63.5916	scaffold_014.g183.t1	putative HC-toxin efflux carrier
EYC84_006186	828.864	863.907	484.039	121.084	96.8276	63.4732	scaffold_001.g138.t1	40S ribosomal protein S4
EYC84_005346	665.331	902.417	452.607	68.6405	96.2355	62.5029	scaffold_003.g377.t1	ribosomal protein 60S
EYC84_001348	68.5486	71.1264	215.217	12.4116	41.0198	62.3081	scaffold_008.g665.t1	glycoside hydrolase family 17 protein
EYC84_012150	88.1212	118.435	214.46	12.9732	34.8608	62.2376	scaffold_016.g506.t1	putative surface protein sp1 protein
EYC84_010989	566.8	753.057	456.982	102.683	80.118	61.713	scaffold_014.g460.t1	60S ribosomal protein L22
EYC84_006970	0	12.8912	584.236	0	0	61.5722	scaffold_001.g922.t1	exported protein-like protein
EYC84_005711	139.293	110.662	266.198	27.2316	22.3481	61.5435	scaffold_003.g742.t1	isocitrate dehydrogenase, NAD-dependent
EYC84_003494	103.901	62.4614	265.133	10.3904	25.7349	61.4611	scaffold_004.g636.t1	Polyubiquitin
EYC84_005945	594.351	788.432	444.994	92.3058	81.477	61.1459	scaffold_003.g976.t1	ARM repeat-containing protein
EYC84_008126	2220.5	625.51	3183.89	375.651	277.142	602.844	scaffold_010.g148.t1	aspartate protease
EYC84_008603	170.082	166.252	336.644	36.2388	45.563	60.8031	scaffold_010.g625.t1	---NA---
EYC84_008809	37.7018	33.354	93.8975	0	16.5367	60.4051	scaffold_012.g154.t1	major royal jelly protein-domain-containing protein
EYC84_012068	534.909	678.591	404.506	65.4783	75.7795	60.0472	scaffold_016.g424.t1	60s ribosomal protein l37a
EYC84_001131	22.1227	14.8868	39.3649	0	16.4366	59.4184	scaffold_008.g448.t1	delta(24(24))-sterol reductase protein
EYC84_006081	528.553	651.591	347.82	89.7598	77.6916	59.3267	scaffold_001.g33.t1	ribosomal protein S5
EYC84_010629	156.867	80.3231	62.3422	25.8809	66.9124	59.2236	scaffold_014.g100.t1	polygalacturonase 2
EYC84_005058	428.55	606.581	476.575	62.1064	75.1909	59.0962	scaffold_003.g89.t1	nucleoside diphosphate kinase
EYC84_000835	229.677	84.8893	236.173	31.3396	24.4243	57.8187	scaffold_008.g152.t1	probable carboxypeptidase Y precursor
EYC84_011045	569.728	726.7	398.767	94.6568	62.3938	57.6711	scaffold_014.g516.t1	60S ribosomal protein L15
EYC84_001268	66.2818	141.85	196.677	21.5807	53.0739	57.5883	scaffold_008.g585.t1	probable Probable 1,4-beta-D-glucan cellobiohydrolase A
EYC84_003527	393.096	287.177	270.974	58.2936	27.4557	57.2933	scaffold_004.g669.t1	putative heat shock 70 kDa protein 2
EYC84_001546	705.287	790.361	430.359	94.0341	88.5491	57.2384	scaffold_005.g176.t1	40S ribosomal protein S6
EYC84_000062	26.3367	121.726	691.069	0	36.0044	56.8211	scaffold_006.g62.t1	glycoside hydrolase family 28 protein
EYC84_003002	181.241	258.439	249.192	41.3957	47.6724	56.5852	scaffold_004.g144.t1	transaldolase
EYC84_002063	137.316	133.749	221.635	43.032	56.4958	56.3455	scaffold_005.g693.t1	malic enzyme
EYC84_000959	525.828	725.481	414.063	118.338	63.9916	56.3099	scaffold_008.g276.t1	60S ribosomal protein L14
EYC84_001169	26.702	13.2821	148.725	0	13.2324	56.3046	scaffold_008.g486.t1	hypothetical protein DID88_005497
EYC84_011533	1693.33	266.757	2231.77	295.463	136.536	551.285	scaffold_015.g412.t1	acid protease 1
EYC84_006364	126.102	109.363	333.624	38.4588	47.6221	55.8934	scaffold_001.g316.t1	---NA---
EYC84_010292	196.729	195.473	291.893	24.9873	73.0701	55.8629	scaffold_011.g443.t1	phosphoglucomutase-like protein
EYC84_004688	494.979	628.877	348.287	81.9325	64.4741	55.6598	scaffold_002.g828.t1	60S ribosomal protein L20
EYC84_010725	487.748	554.538	329.026	74.2434	58.9533	54.5427	scaffold_014.g196.t1	40S ribosomal protein S24
EYC84_005348	638.482	767.131	449.846	84.5572	80.2676	54.4878	scaffold_003.g379.t1	40S ribosomal protein S15
EYC84_006146	190.335	199.798	278.012	39.7307	40.21	53.8163	scaffold_001.g98.t1	putative profilin
EYC84_003456	584.894	644.588	402.758	112.311	69.5082	53.7949	scaffold_004.g598.t1	40S ribosomal protein S1
EYC84_001535	481.213	672.341	350.926	84.3165	68.8595	53.4428	scaffold_005.g165.t1	40S ribosomal protein S8
EYC84_010845	487.984	609.2	293.152	72.8751	63.8916	53.3826	scaffold_014.g316.t1	40S ribosomal protein S10
EYC84_010423	635.901	748.488	399.797	91.3025	83.0293	53.0838	scaffold_011.g574.t1	ribosomal protein L6
EYC84_006225	565.557	618.581	348.036	102.172	73.8486	52.6278	scaffold_001.g177.t1	40S ribosomal protein S9
EYC84_003140	632.025	769.167	359.618	95.5461	92.8347	52.5511	scaffold_004.g282.t1	60S ribosomal protein L1
EYC84_008967	95.147	71.7187	191.709	11.3236	24.6226	52.5472	scaffold_012.g312.t1	putative 1,3-beta-glucan synthase component FKS1
EYC84_004873	302.943	250.532	306.458	45.1652	74.7036	52.5156	scaffold_002.g1013.t1	S-adenosyl-L-methionine-dependent methyltransferase
EYC84_007294	126.091	101.053	213.689	24.1592	24.2379	52.4238	scaffold_001.g1246.t1	DHA14-like major facilitator
EYC84_007773	477.278	594.156	301.355	95.708	67.1205	52.3572	scaffold_009.g461.t1	related to telomeric DNA binding activity
EYC84_003339	24.3141	41.2562	206.732	10.7642	20.1622	51.7011	scaffold_004.g481.t1	carbohydrate esterase family 8 protein
EYC84_010608	66.34	71.5536	203.956	14.1008	50.75	51.6132	scaffold_014.g79.t1	carbohydrate esterase family 8 protein
EYC84_008246	92.5255	66.0335	146.387	10.2571	31.8876	51.1554	scaffold_010.g268.t1	septin protein
EYC84_002157	178.916	50.6917	163.579	42.1583	26.2383	51.1534	scaffold_007.g22.t1	tripeptidyl peptidase A
EYC84_000958	591.721	781.536	425.387	111.334	67.5582	50.4707	scaffold_008.g275.t1	hypothetical protein PGUG_03637
EYC84_011591	256.606	391.436	229.497	75.0775	53.6002	50.3811	scaffold_015.g470.t1	ATP synthase subunit alpha
EYC84_008328	464.554	568.051	314.358	68.9158	67.5083	49.7953	scaffold_010.g350.t1	60S ribosomal protein L34
EYC84_004531	570.117	622.316	355.341	123.328	56.9968	49.6005	scaffold_002.g671.t1	large subunit ribosomal protein L27e
EYC84_006778	59.6213	58.7654	157.182	14.4549	27.9344	49.5965	scaffold_001.g730.t1	14 alpha-demethylase
EYC84_008822	534.561	643.553	375.957	108.755	77.277	49.324	scaffold_012.g167.t1	putative 60S ribosomal protein L27a
EYC84_002912	530.606	590.381	354.018	86.6787	72.7529	49.277	scaffold_004.g54.t1	40S ribosomal protein S5
EYC84_007382	75.0729	50.582	209.309	0	24.1104	48.4202	scaffold_009.g70.t1	putative Carboxypeptidase Y like protein A
EYC84_006226	351.608	533.452	300.89	57.0916	53.7786	47.9456	scaffold_001.g178.t1	60s ribosomal protein l21
EYC84_010693	520.829	657.122	330.424	112.597	64.0285	47.6803	scaffold_014.g164.t1	putative guanine nucleotide-binding protein subunit beta-like protein
EYC84_004923	223.397	186.749	254.598	40.9128	56.3417	47.5151	scaffold_002.g1063.t1	peptidyl-prolyl cis-trans isomerase B
EYC84_000554	110.305	90.9071	189.426	13.8977	33.7916	47.2119	scaffold_006.g554.t1	glycolipid transfer protein
EYC84_006801	322.821	355.22	310.648	57.7122	51.2912	47.0835	scaffold_001.g753.t1	inorganic pyrophosphatase
EYC84_009736	57.2571	54.7053	158.743	12.0053	28.4733	47.0315	scaffold_013.g457.t1	predicted protein
EYC84_006095	451.756	625.249	366.808	63.7478	73.3847	46.9967	scaffold_001.g47.t1	60s ribosomal protein L37
EYC84_001646	389.284	544.878	276.555	84.441	58.2452	46.9467	scaffold_005.g276.t1	60S ribosomal protein L18
EYC84_001132	0	16.4386	34.6925	0	13.9342	46.8334	scaffold_008.g449.t1	celp0028 effector like protein
EYC84_010656	411.288	332.778	1563.51	69.7416	171.907	456.987	scaffold_014.g127.t1	hypersensitive response-inducing protein
EYC84_003951	395.227	617.257	408.789	71.7519	72.4978	45.3878	scaffold_002.g91.t1	40S ribosomal protein S21
EYC84_005117	172.357	163.004	228.729	35.8148	44.7718	45.0674	scaffold_003.g148.t1	tubulin alpha chain
EYC84_006527	112.946	32.5307	226.314	0	21.4036	44.8461	scaffold_001.g479.t1	MFS multidrug transporter-like protein
EYC84_006868	55.2711	44.8435	134.433	0	14.0811	44.5533	scaffold_001.g820.t1	ABC transporter protein
EYC84_005592	488.381	644.714	309.215	67.4732	78.8831	44.3513	scaffold_003.g623.t1	60S ribosomal protein L4
EYC84_002730	79.3755	34.6686	153.846	10.327	17.8114	44.3215	scaffold_007.g595.t1	---NA---
EYC84_007185	105.946	167.855	293.706	19.8915	43.977	44.3136	scaffold_001.g1137.t1	---NA---
EYC84_005483	479.428	612.053	270.608	100.922	61.4464	44.2022	scaffold_003.g514.t1	elongation factor 2
EYC84_001393	99.1557	113.908	210.941	23.2325	24.7892	43.3003	scaffold_005.g23.t1	extracellular serine-threonine rich protein
EYC84_003594	528.134	693.401	330.57	109.96	72.5702	43.2636	scaffold_004.g736.t1	40S ribosomal protein S12
EYC84_004740	439.394	517.303	298.653	72.9252	60.5479	43.231	scaffold_002.g880.t1	60S ribosomal protein L23
EYC84_010420	463.136	584.244	307.493	88.5732	63.9097	43.0249	scaffold_011.g571.t1	60S ribosomal protein L6
EYC84_003671	520.816	613.662	321.337	76.024	74.0494	42.5054	scaffold_004.g813.t1	60S ribosomal protein L7
EYC84_003131	388.592	465.539	302.94	49.8501	50.687	42.4789	scaffold_004.g273.t1	---NA---
EYC84_004185	448.337	494.02	266.751	48.5194	45.4642	42.4412	scaffold_002.g325.t1	60S ribosomal protein L31
EYC84_003592	346.638	481.87	288.161	64.7114	52.7227	42.2322	scaffold_004.g734.t1	---NA---
EYC84_000733	464.195	531.04	272.822	62.6246	53.8349	42.1995	scaffold_008.g50.t1	60S ribosomal protein L24
EYC84_008454	397.935	507.454	342.035	71.6209	54.8857	42.1494	scaffold_010.g476.t1	40S ribosomal protein S29
EYC84_007228	483.409	558.67	303.698	84.2989	62.9301	42.0874	scaffold_001.g1180.t1	60S ribosomal protein L11
EYC84_005576	61.9272	34.7573	129.863	12.8378	15.7987	41.9962	scaffold_003.g607.t1	peptidase s41 family protein
EYC84_007360	403.806	453.312	277.416	65.3974	52.5291	41.8217	scaffold_009.g48.t1	putative 40S ribosomal protein S7
EYC84_007384	370.993	623.735	318.563	62.4061	55.3441	41.7995	scaffold_009.g72.t1	40S ribosomal protein S18
EYC84_008873	377.843	490.563	280.092	71.5488	61.7857	41.6373	scaffold_012.g218.t1	40S ribosomal protein S26E
EYC84_007728	402.611	497.911	278.762	73.1526	59.8181	41.6209	scaffold_009.g416.t1	40S ribosomal protein S3
EYC84_011012	426.61	558.577	266.857	77.7744	59.916	41.5117	scaffold_014.g483.t1	60S ribosomal protein L5
EYC84_009487	26.568	18.4219	93.4848	0	0	41.3168	scaffold_013.g208.t1	WSC domain-containing protein
EYC84_001459	46.4735	52.4904	113.496	12.6368	22.1456	41.2588	scaffold_005.g89.t1	cell division control protein 10
EYC84_003567	464.121	626.033	367.422	56.4755	71.6887	41.2128	scaffold_004.g709.t1	40S ribosomal protein S14
EYC84_009770	50.9231	53.2683	134.507	0	17.6555	41.1731	scaffold_013.g491.t1	alpha-amylase, putative
EYC84_001371	117.11	124.934	217.984	17.3808	30.055	41.1619	scaffold_005.g1.t1	hypothetical protein BCIN_04g06830
EYC84_001733	178.78	182.175	213.083	54.3712	47.2742	41.1393	scaffold_005.g363.t1	Cofilin protein
EYC84_003936	837.822	476.627	2384.85	151.764	193.71	405.896	scaffold_002.g76.t1	related to acetylesterase
EYC84_007062	57.3241	51.6233	91.7849	0	17.8058	40.976	scaffold_001.g1014.t1	extracellular proline-serine rich protein
EYC84_000836	543.761	722.462	397.147	100.721	63.9806	40.9568	scaffold_008.g153.t1	60S ribosomal protein L44
EYC84_001600	373.681	581.377	314.364	96.3026	75.8684	40.6015	scaffold_005.g230.t1	60S acidic ribosomal protein P1
EYC84_007385	457.623	633.43	310.659	77.8134	75.6757	40.5823	scaffold_009.g73.t1	60S ribosomal protein L17
EYC84_009961	514.415	628.267	343.419	79.2561	60.7886	40.5354	scaffold_011.g112.t1	60S ribosomal protein L35
EYC84_001514	516.667	622.581	410.722	92.3536	78.6163	40.3119	scaffold_005.g144.t1	40s ribosomal protein s23
EYC84_002759	424.449	573.168	275.132	86.4275	73.3822	40.1997	scaffold_007.g624.t1	60S acidic ribosomal protein P0
EYC84_011415	174.624	356.71	177.722	28.2716	45.4894	40.0426	scaffold_015.g294.t1	glyceraldehyde-3-phosphate dehydrogenase
EYC84_011152	15.4688	18.6238	76.5261	0	12.703	39.5457	scaffold_015.g31.t1	glycoside hydrolase family 28 protein
EYC84_005664	313.671	385.787	207.04	55.7806	59.6134	39.5294	scaffold_003.g695.t1	putative 6-phosphogluconate dehydrogenase, decarboxylating 2
EYC84_007218	338.478	450.555	281.19	66.5862	46.2801	39.4009	scaffold_001.g1170.t1	60S ribosomal protein L33
EYC84_009529	112.762	72.3044	127.698	12.5757	25.1124	39.3101	scaffold_013.g250.t1	short-chain dehydrogenase
EYC84_004571	481.596	493.715	272.259	72.1847	58.9442	38.9425	scaffold_002.g711.t1	heat shock protein SSB
EYC84_003646	371.831	495.32	259.04	88.0882	55.4531	38.7346	scaffold_004.g788.t1	60S ribosomal protein L25
EYC84_011710	141.152	114.312	252.07	14.5947	18.3989	38.7122	scaffold_016.g66.t1	formate dehydrogenase
EYC84_002705	349.294	484.738	280.203	70.8016	46.9932	38.4867	scaffold_007.g570.t1	40S ribosomal protein S13
EYC84_007686	50.6918	21.7589	102.848	0	11.7792	38.4816	scaffold_009.g374.t1	hypothetical protein DID88_001593
EYC84_001453	82.0618	35.1545	116.827	0	15.6335	38.4315	scaffold_005.g83.t1	related to CLOCK-CONTROLLED PROTEIN 6 (CCG-6)
EYC84_001903	167.871	139.516	173.699	34.0909	37.6432	38.2816	scaffold_005.g533.t1	delta-9 fatty acid desaturase
EYC84_000074	383.829	498.446	291.369	60.5378	46.961	38.2765	scaffold_006.g74.t1	40S ribosomal protein S17
EYC84_004161	371.096	477.79	252.026	67.7226	54.9786	38.2663	scaffold_002.g301.t1	40S ribosomal protein S0
EYC84_007684	24.1757	24.316	85.3146	0	12.925	38.1949	scaffold_009.g372.t1	hypothetical protein DID88_001592
EYC84_008455	410.531	536.477	367.298	80.4905	63.4037	38.1611	scaffold_010.g477.t1	---NA---
EYC84_008281	369.221	482.619	284.331	57.0261	45.76	37.854	scaffold_010.g303.t1	Ribosomal protein L32e
EYC84_011923	130.623	133.793	183.01	24.5589	38.8513	37.6113	scaffold_016.g279.t1	---NA---
EYC84_007812	235.981	145.686	179.393	17.7348	18.542	37.5623	scaffold_009.g500.t1	heat shock protein 90
EYC84_004936	61.9748	87.4686	179.342	13.2662	26.6082	37.3295	scaffold_002.g1076.t1	probable TPM2-tropomyosin, isoform 2
EYC84_002225	334.225	518.63	326.396	65.0676	55.6513	37.1695	scaffold_007.g90.t1	40S ribosomal protein S27
EYC84_006750	165.935	152.746	182.119	21.9805	31.5535	37.0316	scaffold_001.g702.t1	14-3-3 family protein
EYC84_003488	70.6082	56.1352	155.137	10.7598	20.8737	36.8779	scaffold_004.g630.t1	C6 finger domain-containing protein
EYC84_002166	95.0043	67.0617	177.437	11.7211	37.8706	36.8103	scaffold_007.g31.t1	related to isotrichodermin C-15 hydroxylase (cytochrome P-450 monooxygenase CYP65A1)
EYC84_000551	70.6773	54.5833	137.225	0	25.1211	36.688	scaffold_006.g551.t1	glycosyltransferase family 2 protein
EYC84_011849	169.692	36.4322	169.946	11.4547	0	36.6807	scaffold_016.g205.t1	putative serine protease K12H4.7
EYC84_011700	333.544	435.875	222.572	69.5054	48.3048	36.4176	scaffold_016.g56.t1	60S ribosomal protein L28
EYC84_000274	124.029	110.442	198.549	15.5583	28.7853	36.2757	scaffold_006.g274.t1	putative Rho GDP-dissociation inhibitor
EYC84_003167	375.676	396.974	210.328	40.6507	35.0737	35.7788	scaffold_004.g309.t1	40S ribosomal protein S19
EYC84_007788	46.3589	45.8961	120.182	0	19.9372	35.6932	scaffold_009.g476.t1	---NA---
EYC84_006211	223.278	165.738	183.271	37.764	26.9709	35.5647	scaffold_001.g163.t1	Eukaryotic translation initiation factor SUI1
EYC84_011416	141.288	238.168	157.816	23.6587	30.3663	35.4475	scaffold_015.g295.t1	glyceraldehyde 3-phosphate dehydrogenase
EYC84_004186	393.401	430.133	228.48	64.1211	45.2273	35.3331	scaffold_002.g326.t1	---NA---
EYC84_008780	95.1016	133.605	146.866	18.9957	28.5503	34.7074	scaffold_012.g125.t1	ubiquitin-conjugating enzyme E2-16 kDa
EYC84_002901	32.8285	31.6714	348.114	0	10.2267	34.678	scaffold_004.g43.t1	Cerato-platanin domain containing protein
EYC84_001402	167.83	269.622	149.854	37.6962	42.9341	34.627	scaffold_005.g32.t1	putative 5-methyltetrahydropteroyltriglutamate--homocysteine methyltransferase
EYC84_002187	357.763	452.045	246.353	61.6804	44.4789	34.5321	scaffold_007.g52.t1	40S ribosomal protein S11
EYC84_000798	320.616	488.309	266.963	66.5382	43.4464	34.5148	scaffold_008.g115.t1	60S ribosomal protein L30
EYC84_005744	42.1449	23.283	79.8849	0	17.3346	34.478	scaffold_003.g775.t1	glycoside hydrolase family 20 protein
EYC84_008974	445.253	596.783	300.752	92.6753	58.9924	34.379	scaffold_012.g319.t1	40S ribosomal protein S20
EYC84_010395	256.448	248.181	132.054	51.5196	55.4633	34.3597	scaffold_011.g546.t1	adenosylhomocysteinase
EYC84_011832	104.079	140.082	351.178	27.3736	36.3545	34.1994	scaffold_016.g188.t1	zinc-binding alcohol dehydrogenase
EYC84_010016	116.93	166.922	136.398	23.6697	41.0399	34.1343	scaffold_011.g167.t1	S-adenosylmethionine synthase
EYC84_005773	57.5489	63.3796	104.926	0	14.4967	34.0179	scaffold_003.g804.t1	acetyl-CoA hydrolase
EYC84_006969	0	30.0644	344.166	0	0	33.6719	scaffold_001.g921.t1	hypothetical protein DID88_003823
EYC84_006924	30.849	441.159	220.877	0	0	33.4466	scaffold_001.g876.t1	---NA---
EYC84_008872	252.329	218.531	171.538	30.5814	24.1069	33.3762	scaffold_012.g217.t1	aconitate hydratase
EYC84_010068	57.5273	42.2153	185.903	0	15.7817	33.3058	scaffold_011.g219.t1	vitamin B6 transporter
EYC84_003571	308.942	418.281	233.83	48.76	46.6279	32.9077	scaffold_004.g713.t1	40S ribosomal protein S16
EYC84_011506	66.4849	52.0154	133.359	21.8472	17.059	32.9048	scaffold_015.g385.t1	cell division control protein 12
EYC84_003205	77.5582	83.0739	107.568	0	22.7158	32.7802	scaffold_004.g347.t1	glycoside hydrolase family 5 protein
EYC84_003446	90.6303	66.4656	117.398	0	18.0912	32.6732	scaffold_004.g588.t1	class V myosin-like protein
EYC84_001786	48.5762	101.934	192.405	13.738	31.8545	32.565	scaffold_005.g416.t1	predicted protein
EYC84_010374	66.3206	41.633	179.874	0	18.2318	32.4518	scaffold_011.g525.t1	pci domain-containing protein
EYC84_005416	148.071	52.64	151.628	22.9661	23.2866	32.4322	scaffold_003.g447.t1	amino acid transporter protein
EYC84_009833	123.519	221.111	111.321	23.1714	29.2785	32.2569	scaffold_013.g554.t1	GroES-like protein
EYC84_002728	39.7331	23.549	110.977	0	11.2828	32.1201	scaffold_007.g593.t1	sun domain-containing protein
EYC84_010768	183.121	244.589	152.455	30.0941	35.9192	32.017	scaffold_014.g239.t1	putative transketolase
EYC84_008212	355.679	386.44	2634.42	95.7168	114.138	313.617	scaffold_010.g234.t1	pectin methyl esterase
EYC84_003514	402.097	468.072	257.984	71.3064	45.8198	31.7651	scaffold_004.g656.t1	40S ribosomal protein S3aE
EYC84_009410	68.6049	88.2905	276.529	12.2172	14.9666	31.7589	scaffold_013.g131.t1	predicted protein
EYC84_008461	24.3097	17.668	90.3291	0	12.619	31.5916	scaffold_010.g483.t1	acid protease
EYC84_009694	300.214	314.049	241.392	44.7764	41.3189	31.4958	scaffold_013.g415.t1	Histone H4
EYC84_011421	238.576	385.888	213.09	28.2017	51.3492	31.1775	scaffold_015.g300.t1	glycoside hydrolase family 13 protein
EYC84_011606	119.158	117.868	150.583	19.2666	20.6389	30.9021	scaffold_015.g485.t1	NACHT and Ankyrin domain protein
EYC84_002121	70.7919	129.993	171.211	15.2918	30.9301	30.6632	scaffold_005.g751.t1	predicted protein
EYC84_002172	19.8882	31.0611	78.7635	0	17.5956	30.5968	scaffold_007.g37.t1	putative polyketide synthase protein
EYC84_006508	117.248	112.595	158.119	17.7348	32.0048	30.4052	scaffold_001.g460.t1	isomerising glucosamine-fructose-6-phosphate aminotransferase
EYC84_007032	68.378	70.3338	151.768	12.5757	21.1137	30.353	scaffold_001.g984.t1	peroxisomal copper amine oxidase
EYC84_008923	114.968	181.429	70.9681	0	30.1479	30.2143	scaffold_012.g268.t1	pyruvate decarboxylase-like protein
EYC84_007629	331.324	420.353	210.101	82.9357	46.6963	30.2092	scaffold_009.g317.t1	---NA---
EYC84_009186	485.849	324.19	668.512	63.5815	184.971	298.11	scaffold_012.g531.t1	necrosis- and ethylene-inducing protein 2 precursor
EYC84_011534	934.68	143.502	1241.33	182.734	68.5782	297.083	scaffold_015.g413.t1	---NA---
EYC84_000787	2501.25	3205.56	1741.22	428.193	340.547	294.529	scaffold_008.g104.t1	elongation factor 1-alpha
EYC84_007535	163.518	193.618	169.461	46.8389	25.7674	29.9929	scaffold_009.g223.t1	mitochondrial carrier
EYC84_002680	112.548	125.761	180.412	12.7133	36.744	29.8746	scaffold_007.g545.t1	protein disulfide isomerase
EYC84_009485	391.689	467.769	274.064	52.5553	52.3635	29.2257	scaffold_013.g206.t1	60S ribosomal protein L26
EYC84_005180	161.416	191.164	169.939	41.6754	36.2571	29.091	scaffold_003.g211.t1	putative cytochrome b-c1 complex subunit 2
EYC84_011276	488.033	342.534	1068.97	71.3015	127.613	281.892	scaffold_015.g155.t1	Glycoside hydrolase, superfamily
EYC84_011269	30.9593	11.1078	22.0192	0	0	28.9124	scaffold_015.g148.t1	putative lactonohydrolase
EYC84_005124	68.5163	83.2278	132.968	0	21.187	28.7024	scaffold_003.g155.t1	phospholipase D/nuclease
EYC84_010645	35.383	20.6592	73.8046	0	11.0939	28.4555	scaffold_014.g116.t1	Triple functional domain protein
EYC84_006865	35.1344	41.4383	98.9155	0	13.6723	28.4207	scaffold_001.g817.t1	HLH, helix-loop-helix DNA-binding protein
EYC84_012132	35.2965	39.9996	74.6907	0	14.3881	28.3187	scaffold_016.g488.t1	related to RNA binding protein Nrd1
EYC84_010610	4382.2	3975.03	12316.9	743.433	1794.81	2786.44	scaffold_014.g81.t1	polygalacturonase 1
EYC84_006122	81.9516	53.4743	74.1987	11.5835	12.412	27.9289	scaffold_001.g74.t1	nuclear control of ATPase protein-like protein
EYC84_008629	13.3726	29.9365	349.75	0	0	27.8708	scaffold_010.g651.t1	predicted protein
EYC84_007078	115.083	93.637	153.64	23.6042	19.7252	27.8574	scaffold_001.g1030.t1	related to cross-pathway control protein
EYC84_007295	39.6208	44.0322	100.263	10.8253	10.4699	27.8411	scaffold_001.g1247.t1	putative cation-transporting atpase 4 protein
EYC84_006962	300.043	291.108	177.307	49.081	35.7252	27.8259	scaffold_001.g914.t1	ATP-dependent RNA helicase eIF4A
EYC84_000485	178.853	235.27	175.353	37.9649	32.6944	27.8055	scaffold_006.g485.t1	mitochondrial putative malate dehydrogenase
EYC84_003094	128.006	122.018	135.963	16.7558	23.8797	27.7768	scaffold_004.g236.t1	protein YOP1
EYC84_000087	107.945	121.787	204.467	0	21.3168	27.7576	scaffold_006.g87.t1	probable peptidylprolyl isomerase (FK506-binding protein homolog)
EYC84_004196	311.542	409.056	249.978	67.2111	47.4173	27.7279	scaffold_002.g336.t1	60S ribosomal protein L38
EYC84_001516	35.316	32.2739	96.4743	0	13.4015	27.4525	scaffold_005.g146.t1	putative Peptide-N4-(N-acetyl-beta-glucosaminyl)asparagine amidase A
EYC84_007271	276.345	364.994	189.313	37.694	34.9598	27.1904	scaffold_001.g1223.t1	---NA---
EYC84_006043	44.0185	28.2543	99.9473	0	10.4572	27.1239	scaffold_003.g1074.t1	G protein coupled receptor family protein
EYC84_004331	146.327	156.133	133.312	22.47	27.2399	26.973	scaffold_002.g471.t1	mitochondrial processing peptidase beta subunit
EYC84_003442	366.837	341.501	158.306	68.9003	37.0428	26.7515	scaffold_004.g584.t1	40S ribosomal protein S3aE
EYC84_002681	79.4209	74.8947	110.985	17.6671	18.3476	26.7393	scaffold_007.g546.t1	protein disulfide isomerase
EYC84_010765	88.4975	80.4821	138.301	11.9508	25.2798	26.6445	scaffold_014.g236.t1	V-type proton ATPase proteolipid subunit
EYC84_010952	46.3654	33.6112	74.5754	0	10.4446	26.4384	scaffold_014.g423.t1	kinase-like protein
EYC84_001585	177.116	202.372	135.439	22.9726	30.232	26.3802	scaffold_005.g215.t1	outer mitochondrial membrane protein porin
EYC84_009840	134.376	129.317	134.94	26.1061	29.2387	26.0496	scaffold_013.g561.t1	subunits of heterodimeric actin filament capping protein Capz
EYC84_005534	132.89	182.842	127.664	31.2806	28.6401	25.9883	scaffold_003.g565.t1	putative ATP synthase subunit gamma, mitochondrial
EYC84_000547	57.3933	36.2787	83.4781	12.1473	17.5516	25.9403	scaffold_006.g547.t1	glycosyltransferase family 2 protein
EYC84_005719	24.3119	10.0775	147.656	0	0	25.6272	scaffold_003.g750.t1	sphingomyelin phosphodiesterase
EYC84_012062	119.543	160.308	148.722	35.474	22.2816	25.5477	scaffold_016.g418.t1	histone H4
EYC84_006475	26.5486	15.5539	52.4643	0	0	25.3191	scaffold_001.g427.t1	---NA---
EYC84_011587	79.4923	82.7908	79.656	12.5823	12.1342	25.2976	scaffold_015.g466.t1	succinate dehydrogenase subunit A
EYC84_005176	81.5215	35.955	128.676	0	13.3669	25.2915	scaffold_003.g207.t1	autophagy-like protein 8
EYC84_005890	156.88	270.239	156.855	28.0073	38.6985	25.2864	scaffold_003.g921.t1	ketol-acid reductoisomerase, mitochondrial precursor
EYC84_005597	125.754	200.051	160.8	22.9049	25.2488	25.2547	scaffold_003.g628.t1	ATP synthase subunit 4, mitochondrial precursor
EYC84_000229	41.6694	41.731	102.664	0	12.9948	25.1517	scaffold_006.g229.t1	ATP-dependent protease La
EYC84_000555	59.4895	74.3918	132.649	13.205	22.3723	25.1477	scaffold_006.g555.t1	DUF890 domain protein
EYC84_008962	59.7769	37.3559	96.6483	0	10.9696	25.1304	scaffold_012.g307.t1	---NA---
EYC84_002167	37.4748	48.1296	118.305	0	21.1582	25.1303	scaffold_007.g32.t1	cytochrome P450 monooxygenase
EYC84_009474	59.7446	68.5933	88.6279	11.0241	19.2811	25.0283	scaffold_013.g195.t1	glycoside hydrolase family 72 protein
EYC84_006237	64.071	131.285	131.299	10.1938	17.2433	25.0222	scaffold_001.g189.t1	hypothetical protein SBOR_9694
EYC84_011807	1136	1084.69	1449.61	170.355	179.566	243.685	scaffold_016.g163.t1	membrane-associated proteins in eicosanoid and glutathione metabolism
EYC84_007270	201.117	305.728	176.618	24.2291	29.428	24.9783	scaffold_001.g1222.t1	60S ribosomal protein L36
EYC84_010427	66.4158	41.4133	119.678	14.6669	20.1497	24.8651	scaffold_011.g578.t1	inactive receptor kinase protein
EYC84_012111	70.5174	80.3599	82.3853	18.0035	21.5348	24.8243	scaffold_016.g467.t1	probable Delta(12) fatty acid desaturase
EYC84_006362	57.6678	30.4954	133.791	0	13.6672	24.8099	scaffold_001.g314.t1	---NA---
EYC84_002939	229.869	248.673	162.934	42.7243	36.5291	24.7906	scaffold_004.g81.t1	mitochondrial phosphate carrier protein
EYC84_009362	48.6842	31.2063	90.8067	0	17.3473	24.754	scaffold_013.g83.t1	viral A-type inclusion protein repeat domain-containing protein
EYC84_007278	61.925	69.3555	107.082	18.0712	16.3291	24.7528	scaffold_001.g1230.t1	14-3-3 protein
EYC84_003498	63.8159	50.0164	81.6565	14.5969	15.535	24.7129	scaffold_004.g640.t1	mannose-1-phosphate guanyltransferase
EYC84_010844	227.622	274.636	137.779	35.1134	25.152	24.6324	scaffold_014.g315.t1	---NA---
EYC84_007986	68.4428	101.459	100.467	26.2482	23.0284	24.563	scaffold_010.g8.t1	AP-2 complex subunit mu-1
EYC84_005791	33.0642	100.336	132.212	20.2456	15.9863	24.5151	scaffold_003.g822.t1	---NA---
EYC84_004245	50.9491	53.8909	93.1659	0	30.1524	24.5039	scaffold_002.g385.t1	Nmra-like family protein
EYC84_007392	225.556	383.463	207.052	33.0987	38.2163	24.4701	scaffold_009.g80.t1	translationally controlled tumor protein
EYC84_002401	26.5205	24.9304	69.0647	0	10.1833	24.2538	scaffold_007.g266.t1	mucin-7 precursor
EYC84_006116	22.1205	15.8788	43.7448	0	0	24.2498	scaffold_001.g68.t1	cellobiose dehydrogenase
EYC84_006920	119.431	228.114	171.536	20.6585	15.6022	24.2121	scaffold_001.g872.t1	---NA---
EYC84_009738	57.5295	53.2173	95.8828	19.9526	18.3368	24.0814	scaffold_013.g459.t1	Membrane involved in colicin uptake protein
EYC84_003402	233.742	377.891	2714.76	50.3375	53.1233	238.407	scaffold_004.g544.t1	---NA---
EYC84_006356	185.49	201.241	669.215	54.4367	95.1551	232.267	scaffold_001.g308.t1	extracellular serine-threonine rich protein
EYC84_004855	37.5246	18.5332	55.1799	0	10.6361	23.9958	scaffold_002.g995.t1	---NA---
EYC84_008077	19.778	13.8115	98.4501	0	0	23.9631	scaffold_010.g99.t1	acetyl-CoA synthetase-like protein
EYC84_004031	21.939	19.8927	80.2746	0	12.2496	23.807	scaffold_002.g171.t1	predicted protein
EYC84_008130	66.2364	90.494	87.9966	10.0628	18.2701	23.7834	scaffold_010.g152.t1	putative cell division control protein 48
EYC84_001758	57.7067	25.1167	57.8508	0	0	23.655	scaffold_005.g388.t1	putative r3h domain protein
EYC84_009737	39.7137	30.5377	82.937	0	18.092	23.61	scaffold_013.g458.t1	hypothetical protein DID88_008016
EYC84_006042	59.6711	20.1002	138.131	0	0	23.5019	scaffold_003.g1073.t1	carbohydrate esterase family 16 protein
EYC84_008258	64.231	47.4817	121.558	14.0331	14.4983	23.4743	scaffold_010.g280.t1	putative scp-like extracellular protein
EYC84_008973	287.764	348.907	161.525	49.3497	35.7485	23.3396	scaffold_012.g318.t1	---NA---
EYC84_003057	68.5357	101.952	90.7546	23.2391	19.2108	23.2163	scaffold_004.g199.t1	protein transport protein SEC61 alpha subunit
EYC84_005429	302.405	422.953	213.895	37.0691	41.2594	23.1919	scaffold_003.g460.t1	eukaryotic translation initiation factor 5A
EYC84_006580	86.4185	41.4623	94.4662	0	12.9172	23.1919	scaffold_001.g532.t1	hypothetical protein SBOR_1286
EYC84_002169	30.8772	34.6788	68.3992	0	14.3454	22.997	scaffold_007.g34.t1	putative hybrid pks-nrps protein
EYC84_002410	61.8148	50.3471	134.293	11.3848	22.4127	22.9897	scaffold_007.g275.t1	UDP-4-keto-6-deoxy-glucose-3,5-epimerase/ UDP-4-keto-rhamnose-4-keto-reductase
EYC84_008971	26.4319	24.1136	82.2433	0	0	22.8112	scaffold_012.g316.t1	glycoside hydrolase family 17 protein
EYC84_001889	55.5911	62.66	114.176	32.3141	21.2794	22.7368	scaffold_005.g519.t1	---NA---
EYC84_005425	26.6091	39.8305	54.7029	0	0	22.6173	scaffold_003.g456.t1	cytochrome P450
EYC84_012034	37.4554	24.4099	66.5641	0	11.6508	22.5042	scaffold_016.g390.t1	DUF1900-domain-containing protein
EYC84_004244	70.7832	40.85	85.0595	0	27.4128	22.4878	scaffold_002.g384.t1	flavin-binding monooxygenase protein
EYC84_003448	145.452	151.931	105.246	20.5864	23.2727	22.4133	scaffold_004.g590.t1	nucleosome assembly protein
EYC84_000897	53.2009	60.0251	82.6716	0	16.5466	22.4022	scaffold_008.g214.t1	actin-like ATPase domain-containing protein
EYC84_006967	0	24.8728	247.187	0	0	22.2755	scaffold_001.g919.t1	DUF3328 domain containing protein
EYC84_001338	35.3873	12.5052	56.355	0	0	22.2705	scaffold_008.g655.t1	hypothetical protein BCIN_09g00140
EYC84_003721	41.9655	30.8098	77.328	0	14.4951	22.1593	scaffold_004.g863.t1	Septin-domain-containing protein
EYC84_008370	52.9934	36.6477	88.22	12.3461	0	22.1256	scaffold_010.g392.t1	Ras-like protein Rab7
EYC84_002170	26.4513	45.2535	112.773	0	28.2383	22.094	scaffold_007.g35.t1	cytochrome P450 monooxygenase
EYC84_008318	280.753	163.783	624.509	38.9527	83.616	218.836	scaffold_010.g340.t1	extracellular conserved serine-rich protein
EYC84_005252	209.953	281.326	136.027	42.792	44.6644	21.9379	scaffold_003.g283.t1	mitochondrial putative citrate synthase
EYC84_007083	0	14.2933	170.21	0	0	21.9031	scaffold_001.g1035.t1	carbohydrate esterase family 8 protein
EYC84_010243	234.183	276.381	141.871	52.1946	32.7735	21.898	scaffold_011.g394.t1	elongation factor 1-beta
EYC84_008447	64.1336	39.5169	92.9534	10.3292	14.0279	21.8654	scaffold_010.g469.t1	vacuolar protein 8
EYC84_000461	61.8343	52.1004	170.554	0	19.9867	21.7645	scaffold_006.g461.t1	Aldo/keto reductase
EYC84_010392	61.7607	54.4562	80.0043	0	14.84	21.7104	scaffold_011.g543.t1	serine/threonine-protein kinase
EYC84_000759	92.5515	128.797	160.988	15.0908	11.6862	21.6614	scaffold_008.g76.t1	ZIP zinc/iron transport family
EYC84_009375	33.1528	44.756	63.0429	13.6747	0	21.6196	scaffold_013.g96.t1	GDPD-domain-containing protein
EYC84_001486	126.245	123.865	183.296	10.1305	16.8811	21.5971	scaffold_005.g116.t1	putative NADP-dependent alcohol dehydrogenase C 2
EYC84_009215	0	40.6041	276.889	0	14.2551	21.5736	scaffold_012.g560.t1	glycoside hydrolase family 43 protein
EYC84_006609	57.6181	21.6026	77.1039	0	0	21.5166	scaffold_001.g561.t1	putative cutinase g-box binding protein
EYC84_005893	31.0544	33.2051	82.0666	0	12.4391	21.493	scaffold_003.g924.t1	glycosyltransferase family 2 protein
EYC84_005495	22.0773	40.1702	93.9913	0	10.1144	21.4748	scaffold_003.g526.t1	alpha-12-mannosidase family protein
EYC84_007485	37.7537	20.0349	73.0612	0	0	21.4237	scaffold_009.g173.t1	bni4 protein
EYC84_003679	43.9753	0	90.4252	0	0	21.383	scaffold_004.g821.t1	related to non-ribosomal peptide synthetase
EYC84_006587	75.2977	101.292	102.82	18.5673	24.0964	21.3482	scaffold_001.g539.t1	calreticulin family protein
EYC84_001564	79.7452	50.8741	89.1541	12.7177	14.6623	21.3155	scaffold_005.g194.t1	vacuolar ATP synthase subunit B
EYC84_010799	140.929	155.591	108.514	14.4659	23.4929	21.2727	scaffold_014.g270.t1	cytochrome c
EYC84_000200	110.201	103.986	95.3947	10.8952	15.8674	21.2603	scaffold_006.g200.t1	ubiquinol-cytochrome c reductase iron-sulfur subunit
EYC84_007165	68.3066	139.665	120.462	23.309	18.2854	21.2074	scaffold_001.g1117.t1	cytochrome c1
EYC84_002353	130.312	137.912	121.805	0	20.4259	21.0503	scaffold_007.g218.t1	RNA-binding domain-containing protein
EYC84_010007	20.0027	18.1866	70.2528	0	10.4733	21.0176	scaffold_011.g158.t1	predicted protein
EYC84_008658	436.105	379.243	1192.2	89.9327	108.444	208.352	scaffold_012.g3.t1	aldehyde dehydrogenase
EYC84_011158	114.864	92.9235	107.775	0	20.0721	20.9166	scaffold_015.g37.t1	putative glucose-6-phosphate isomerase
EYC84_009071	86.3882	56.1317	83.5782	0	16.6897	20.8339	scaffold_012.g416.t1	sec14 cytosolic factor
EYC84_003047	15.3802	27.3412	52.4525	0	11.6145	20.8085	scaffold_004.g189.t1	protein kinase
EYC84_005588	94.9222	121.361	119.897	22.0681	24.321	20.7206	scaffold_003.g619.t1	cytochrome c oxidase-like protein subunit 5A
EYC84_004664	50.6508	77.4621	89.123	14.0986	18.4662	20.5838	scaffold_002.g804.t1	probable oxoglutarate dehydrogenase precursor
EYC84_011113	94.9914	99.3345	93.1532	0	20.0917	20.5145	scaffold_014.g584.t1	homocitrate synthase
EYC84_011112	108.314	38.6068	73.1417	16.1221	10.1998	20.5105	scaffold_014.g583.t1	predicted protein
EYC84_007846	46.3849	29.9766	76.8247	0	10.9971	20.4666	scaffold_009.g534.t1	putative Homeobox protein HOY1
EYC84_008066	52.654	56.4337	69.9919	13.6091	11.602	20.4554	scaffold_010.g88.t1	NADH-ubiquinone oxidoreductase 51 kDa subunit
EYC84_000033	35.4543	20.8975	83.6479	0	0	20.3178	scaffold_006.g33.t1	related to transcription factor medusa
EYC84_009990	187.621	302.605	82.3032	34.7748	25.283	20.2728	scaffold_011.g141.t1	fructose-bisphosphate aldolase 1
EYC84_012063	61.843	129.666	127.84	17.1666	26.8334	20.2728	scaffold_016.g419.t1	calcium ATPase
EYC84_007761	61.9964	22.7304	39.9953	0	0	20.2024	scaffold_009.g449.t1	zinc finger protein Pac1
EYC84_004863	55.2085	116.402	112.316	0	20.6207	20.1962	scaffold_002.g1003.t1	GroES-like protein
EYC84_002173	24.3097	19.0308	73.3006	0	20.4155	20.1861	scaffold_007.g38.t1	alpha/beta-hydrolase
EYC84_010821	13.284	13.9555	42.7317	0	0	20.1218	scaffold_014.g292.t1	Orm1 type endoplasmic reticulum protein
EYC84_001449	128.042	122.029	58.9386	31.6104	18.4447	20.03	scaffold_005.g79.t1	glycosyltransferase family 2 protein
EYC84_008600	413.164	466.732	950.546	106.179	129.929	196.978	scaffold_010.g622.t1	putative woronin body major protein
EYC84_003005	63.9802	126.282	107.649	16.4893	19.2598	19.9646	scaffold_004.g147.t1	cupper/zinc superoxide dismutase
EYC84_009781	79.7257	57.7737	80.3411	0	11.2305	19.9258	scaffold_013.g502.t1	RNA recognition domain-containing protein
EYC84_002409	52.7642	34.8823	98.8456	10.7532	16.1101	19.8902	scaffold_007.g274.t1	NAD dependent epimerase/dehydratase
EYC84_010850	94.9849	105.083	117.396	29.2462	15.2221	19.732	scaffold_014.g321.t1	cytochrome c oxidase polypeptide VIb
EYC84_002729	11.0063	10.9779	53.7163	0	0	19.6881	scaffold_007.g594.t1	sun domain-containing protein
EYC84_000849	81.8824	129.225	110.629	30.4916	26.6497	19.6565	scaffold_008.g166.t1	ATP synthase subunit O
EYC84_000296	123.777	143.062	99.0417	30.5115	14.19	19.6504	scaffold_006.g296.t1	hypothetical protein SS1G_08534
EYC84_011345	48.626	40.2027	69.3906	0	15.0744	19.6188	scaffold_015.g224.t1	actin binding protein
EYC84_010571	53.0388	75.7752	126.854	15.2918	29.907	19.5372	scaffold_014.g42.t1	FMN-linked oxidoreductase
EYC84_008327	209.722	269.457	130.588	15.4906	31.3823	19.4994	scaffold_010.g349.t1	---NA---
EYC84_006898	101.771	121.667	100.949	22.7386	18.335	19.4892	scaffold_001.g850.t1	phospho-2-dehydro-3-deoxyheptonate aldolase
EYC84_010075	59.7381	51.0858	67.3089	12.084	15.1373	19.4882	scaffold_011.g226.t1	SURF4-domain-containing protein
EYC84_006061	13.2818	16.0892	48.1371	0	0	19.3332	scaffold_001.g13.t1	snare domain-containing protein
EYC84_000957	240.811	280.257	130.096	34.4229	26.9195	19.2976	scaffold_008.g274.t1	nascent polypeptide-associated complex, alpha subunit
EYC84_002437	31.0522	73.3208	180.661	0	15.0102	19.2392	scaffold_007.g302.t1	NAD(P)-binding protein
EYC84_000956	141.78	129.9	106.54	15.2241	20.816	19.2279	scaffold_008.g273.t1	ATP synthase D chain, mitochondrial
EYC84_002720	30.8923	48.1139	74.2744	0	17.2775	19.2087	scaffold_007.g585.t1	endoplasmic reticulum-golgi intermediate compartment protein-like protein 3
EYC84_008540	73.4284	59.3296	119.482	20.099	16.24	19.1648	scaffold_010.g562.t1	predicted protein
EYC84_004456	340.846	154.012	469.802	57.4979	129.485	189.743	scaffold_002.g596.t1	Concanavalin A-like lectin glucanases superfamily protein
EYC84_010609	159.075	245.697	618.282	52.2579	116.975	185.52	scaffold_014.g80.t1	carbohydrate esterase family 8 protein
EYC84_004937	53.1339	50.9908	95.0517	0	18.5074	18.9902	scaffold_002.g1077.t1	protein required for cell viability Rrp17
EYC84_007456	26.5054	32.2399	89.2121	0	11.2135	18.8607	scaffold_009.g144.t1	EBDP2, emopamil-binding protein
EYC84_011288	15.3564	16.3005	63.5707	0	0	18.8138	scaffold_015.g167.t1	putative transport SEC9 protein
EYC84_004173	121.393	0	30.4686	20.9514	0	18.7974	scaffold_002.g313.t1	acid protease
EYC84_002590	0	16.346	39.6774	0	0	18.7699	scaffold_007.g455.t1	hypothetical protein DID88_007589
EYC84_007279	26.6804	55.8157	64.3922	13.5348	14.8814	18.7597	scaffold_001.g1231.t1	---NA---
EYC84_002438	10.9587	49.4647	129.617	0	0	18.7158	scaffold_007.g303.t1	NAD(P)-binding protein
EYC84_004846	136.702	139.243	143.402	27.0719	26.0121	18.6465	scaffold_002.g986.t1	L-arabinitol 4-dehydrogenase
EYC84_005347	242.52	339.032	203.761	36.0791	37.0326	18.6425	scaffold_003.g378.t1	40s ribosomal protein S15
EYC84_006624	59.6689	36.5916	71.4943	0	15.5984	18.6302	scaffold_001.g576.t1	aminopeptidase 2 protein
EYC84_006680	72.8903	72.1287	109.419	0	13.1973	18.6048	scaffold_001.g632.t1	putative actin-related protein 2/3 complex subunit 1
EYC84_006176	39.6186	16.4531	46.1442	0	0	18.5863	scaffold_001.g128.t1	phosphoinositide phosphatase
EYC84_008634	17.6796	17.3453	83.0511	0	10.444	18.322	scaffold_010.g656.t1	glycoside hydrolase family 13 protein
EYC84_006977	28.7745	21.0109	67.6219	0	10.6476	18.2781	scaffold_001.g929.t1	TRP-domain-containing protein
EYC84_006489	0	22.7614	72.6979	0	0	18.2139	scaffold_001.g441.t1	carbohydrate-binding module family 63 protein
EYC84_000078	13.3488	13.1494	53.2676	0	12.0934	18.1373	scaffold_006.g78.t1	peptidase a1 protein
EYC84_009748	0	17.8074	43.9882	0	0	18.1057	scaffold_013.g469.t1	glycoside hydrolase family 78 protein
EYC84_004486	19.8688	28.5673	61.1495	0	0	18.1047	scaffold_002.g626.t1	pheromone processing endoprotease Kex2
EYC84_004626	48.6194	89.239	86.3574	12.7067	16.2269	18.0781	scaffold_002.g766.t1	WD40 repeat-like protein
EYC84_007201	116.95	87.8993	496.349	19.3387	61.8375	171.597	scaffold_001.g1153.t1	glycoside hydrolase family 17 protein
EYC84_010899	108.059	121.415	87.6962	12.7767	22.532	17.9475	scaffold_014.g370.t1	glutamine synthetase
EYC84_002030	106.147	157.973	95.5639	20.2609	27.6863	17.8477	scaffold_005.g660.t1	pyruvate dehydrogenase E1 component subunit alpha
EYC84_006811	0	19.4202	47.5681	0	0	17.8324	scaffold_001.g763.t1	putative WHI2-like protein P4H10.16c
EYC84_000971	11.0495	26.8111	47.2481	0	0	17.7823	scaffold_008.g288.t1	ApbA-domain-containing protein
EYC84_009067	37.5743	22.0974	88.5491	0	0	17.663	scaffold_012.g412.t1	aspartic proteinase, pepstatin-sensitive
EYC84_008876	33.2414	32.9059	50.5058	0	0	17.61	scaffold_012.g221.t1	oxysterol-binding protein-like protein
EYC84_009834	59.6711	127.127	53.0874	0	14.174	17.4692	scaffold_013.g555.t1	---NA---
EYC84_009263	22.1011	35.1921	91.4162	0	23.728	17.4467	scaffold_012.g608.t1	---NA---
EYC84_004657	57.8407	32.7374	60.1422	0	0	17.4089	scaffold_002.g797.t1	FAD/NAD(P)-binding domain-containing protein
EYC84_005084	44.2022	59.5844	56.9624	10.3292	0	17.3875	scaffold_003.g115.t1	related to centractin (ARP1)
EYC84_008014	21.9887	23.3387	134.419	0	15.3596	17.3813	scaffold_010.g36.t1	small secreted protein
EYC84_010560	75.0967	81.5274	130.841	23.5299	21.7912	17.3324	scaffold_014.g31.t1	actin-like protein 2
EYC84_010947	33.3754	40.2741	65.5327	0	10.1936	17.2771	scaffold_014.g418.t1	PLP-dependent transferase
EYC84_010787	61.9683	141.421	67.859	24.865	21.7493	17.2038	scaffold_014.g258.t1	Retrovirus zinc finger-like protein
EYC84_010130	77.2642	62.2524	71.204	0	13.7774	17.1222	scaffold_011.g281.t1	Nuclease subunit C protein
EYC84_001376	156.836	56.0972	132.433	18.5673	17.9334	17.111	scaffold_005.g6.t1	Regulatory cys-3 protein
EYC84_000736	176.764	298.408	138.177	49.1619	29.7589	17.0406	scaffold_008.g53.t1	nascent polypeptide-associated complex subunit beta
EYC84_008551	50.8756	44.9122	88.6911	0	14.9397	17.014	scaffold_010.g573.t1	sterol 24-C-methyltransferase
EYC84_004746	327.333	146.393	622.307	52.5839	86.0207	161.937	scaffold_002.g886.t1	PGX, glycoside hydrolase family 28 protein
EYC84_006660	159.168	142.026	96.8842	22.1358	14.9601	16.9498	scaffold_001.g612.t1	40S ribosomal protein S28
EYC84_008829	17.5888	32.3404	59.089	0	0	16.9171	scaffold_012.g174.t1	Sec23/Sec24 family protein
EYC84_006675	130.281	170.791	107.079	27.5112	21.2958	16.9008	scaffold_001.g627.t1	GTP-binding nuclear protein GSP1/Ran
EYC84_010761	201.041	184.326	157.826	36.6083	29.5288	16.859	scaffold_014.g232.t1	GTP-binding protein EsdC
EYC84_011222	51.0853	16.9481	58.018	12.5691	0	16.8558	scaffold_015.g101.t1	tripeptidyl peptidase-like protein
EYC84_002367	19.9163	10.4157	36.4079	0	0	16.7875	scaffold_007.g232.t1	GRAM domain-containing protein
EYC84_009562	33.0144	29.7783	104.394	0	0	16.6702	scaffold_013.g283.t1	glycoside hydrolase family 28 protein
EYC84_006238	37.3668	62.7659	68.3688	10.1938	14.3206	16.6326	scaffold_001.g190.t1	glycosyltransferase family 39 protein
EYC84_001866	48.5286	18.4835	48.0172	0	0	16.6141	scaffold_005.g496.t1	Regulator of phospholipase D SRF1 protein
EYC84_000451	0	10.9063	34.622	0	0	16.5876	scaffold_006.g451.t1	3-carboxymuconate cyclase-like protein-like protein
EYC84_011213	280.133	255.447	105.683	46.7712	34.3897	16.5672	scaffold_015.g92.t1	RNA-binding domain-containing protein
EYC84_001896	72.9097	50.6527	57.2485	0	11.0669	16.4794	scaffold_005.g526.t1	C2H2 and C2HC zinc finger
EYC84_011485	28.6577	19.3641	33.925	0	0	16.4304	scaffold_015.g364.t1	RhoGAP-domain-containing protein
EYC84_006528	35.3182	16.8353	82.7899	0	0	16.4213	scaffold_001.g480.t1	---NA---
EYC84_009874	77.3895	77.8695	102.887	0	22.0571	16.4151	scaffold_011.g25.t1	hydroxymethylglutaryl-CoA synthase
EYC84_011418	50.9513	76.2674	74.918	13.4693	12.5026	16.3937	scaffold_015.g297.t1	cytochrome c oxidase subunit V
EYC84_006829	17.8158	11.2214	41.7899	0	0	16.31	scaffold_001.g781.t1	Tubulin glycylase 3B protein
EYC84_007609	73.1107	25.1354	80.516	0	10.0583	16.2907	scaffold_009.g297.t1	protease S8 tripeptidyl peptidase I
EYC84_010476	168.186	229.159	94.0487	40.8429	24.0909	16.1999	scaffold_011.g627.t1	phosphoglycerate kinase
EYC84_006217	107.973	114.656	131.262	10.952	12.9166	16.1876	scaffold_001.g169.t1	cytochrome c oxidase subunit VIa
EYC84_006422	26.4751	21.265	42.6369	0	0	16.1815	scaffold_001.g374.t1	transmembrane protein
EYC84_011344	22.2135	33.0374	62.854	10.196	0	16.1652	scaffold_015.g223.t1	hypothetical protein SS1G_07642
EYC84_011571	224.94	217.408	87.9767	27.0173	25.3297	16.1611	scaffold_015.g450.t1	RNA-binding domain-containing protein
EYC84_008759	24.5129	15.8935	54.6251	0	0	16.155	scaffold_012.g104.t1	glycosyltransferase family 20 protein
EYC84_009475	77.2361	118.61	63.6065	26.7377	18.3048	16.1346	scaffold_013.g196.t1	ATP-citrate synthase subunit 1
EYC84_004045	57.6613	14.596	39.9678	0	0	16.058	scaffold_002.g185.t1	putative vacuolar calcium ion transporter protein
EYC84_000446	26.3605	34.5162	79.0045	0	10.957	16.0406	scaffold_006.g446.t1	ras-domain-containing protein
EYC84_001035	22.0536	16.4531	73.2843	0	0	16.0163	scaffold_008.g352.t1	flavin-binding monooxygenase-like protein
EYC84_003409	1196.06	1669.79	1060.64	241.893	172.456	155.992	scaffold_004.g551.t1	---NA---
EYC84_007186	327.339	478.461	1058.77	81.8758	148.533	155.9	scaffold_001.g1138.t1	cyanovirin-N family protein
EYC84_004330	59.7813	61.0014	79.2227	0	0	15.9876	scaffold_002.g470.t1	succinate dehydrogenase subunit D
EYC84_010801	112.898	113.93	87.6919	27.1484	13.2519	15.9335	scaffold_014.g272.t1	---NA---
EYC84_002151	28.6642	13.4234	51.5971	0	0	15.9234	scaffold_007.g16.t1	hypothetical protein DID88_009217
EYC84_003846	26.6113	40.8135	42.6409	0	0	15.9071	scaffold_004.g988.t1	NADH-ubiquinone oxidoreductase-like protein 299 kDa subunit
EYC84_006526	59.4398	61.7569	121.859	0	10.2486	15.907	scaffold_001.g478.t1	mitochondrial peroxiredoxin PRX1
EYC84_011569	75.2911	110.369	84.1697	16.8213	18.0934	15.8765	scaffold_015.g448.t1	atp-specific succinyl-CoA synthetase beta subunit
EYC84_009289	61.8321	61.3022	97.6174	0	20.8347	15.8163	scaffold_013.g10.t1	fatty acid hydroxylase
EYC84_008785	66.3509	65.972	62.5813	0	12.7873	15.8153	scaffold_012.g130.t1	predicted protein
EYC84_004267	41.8747	28.1415	54.3394	13.8057	12.3251	15.7989	scaffold_002.g407.t1	immunogenic protein
EYC84_003397	37.7255	23.2246	69.0986	0	0	15.7713	scaffold_004.g539.t1	integral membrane protein
EYC84_008417	42.0196	18.5118	59.7146	0	0	15.7438	scaffold_010.g439.t1	related to DNA-binding protein
EYC84_002383	11.0733	13.5986	29.7183	0	0	15.7427	scaffold_007.g248.t1	related to YAP1-transcriptional activator involved in oxidative stress response
EYC84_010257	68.5746	48.959	79.4703	0	11.5827	15.6346	scaffold_011.g408.t1	TATA-box-binding protein
EYC84_006207	41.8077	34.595	36.7145	0	10.4293	15.6214	scaffold_001.g159.t1	probable GTP-binding protein rac1
EYC84_003908	64.0538	26.1168	51.0697	0	15.8461	15.6091	scaffold_002.g48.t1	Alcohol acetyltransferase
EYC84_005792	68.5314	98.456	115.644	17.2431	17.1262	15.5723	scaffold_003.g823.t1	nadp-specific glutamate dehydrogenase
EYC84_000962	0	12.624	58.3721	0	0	15.5307	scaffold_008.g279.t1	glycoside hydrolase family 16 protein
EYC84_007122	165.574	217.456	83.5193	10.6921	34.8095	15.5224	scaffold_001.g1074.t1	pyruvate kinase
EYC84_001729	39.9407	37.4711	86.614	0	0	15.4316	scaffold_005.g359.t1	ras-related protein rab-like protein-11B
EYC84_003995	70.472	67.4189	67.6232	11.5813	17.13	15.4153	scaffold_002.g135.t1	acetyl- acetyltransferase protein
EYC84_008839	83.8965	109.295	98.4309	0	15.8372	15.2868	scaffold_012.g184.t1	histone H1/5
EYC84_004050	28.5475	25.4489	49.5093	0	0	15.2846	scaffold_002.g190.t1	Protein kinase-like (PK-like)
EYC84_002044	61.8797	96.2628	97.6267	0	15.9121	15.2806	scaffold_005.g674.t1	related to oxidoreductase related to nitroreductase
EYC84_005145	50.828	69.6441	84.4336	19.3321	19.4424	15.2541	scaffold_003.g176.t1	glycosyltransferase family 66 protein
EYC84_007093	53.2939	62.2836	90.1906	0	15.6502	15.253	scaffold_001.g1045.t1	cytochrome b5 reductase-like protein
EYC84_003381	28.6383	15.8764	41.0498	0	0	15.195	scaffold_004.g523.t1	gpi-anchored cell surface glyco protein
EYC84_007607	15.3327	18.6112	50.5908	0	0	15.1776	scaffold_009.g295.t1	P-loop containing nucleoside triphosphate hydrolase protein
EYC84_000492	201.181	181.639	104.961	29.8887	26.0743	15.0367	scaffold_006.g492.t1	elongation factor 3
EYC84_001907	13.2818	10.3238	48.3996	0	0	15.0367	scaffold_005.g537.t1	MOSC domain-containing protein
EYC84_005250	35.383	81.688	68.6359	0	20.0044	15.0244	scaffold_003.g281.t1	putative mitochondrial DNA replication protein YHM2
EYC84_011646	39.7137	86.533	69.363	0	0	15.0001	scaffold_016.g2.t1	NADP-specific glutamate dehydrogenase
EYC84_000628	258.635	156.858	565.118	51.6682	90.6852	149.438	scaffold_006.g628.t1	putative plasma membrane ATPase
EYC84_007685	214.13	108.345	491.877	19.5595	67.5401	148.313	scaffold_009.g373.t1	glycoside hydrolase family 32 protein
EYC84_007325	547.058	114.535	453.905	126.912	52.1455	143.302	scaffold_009.g13.t1	carboxypeptidase S1 protein
EYC84_011532	461.8	66.3042	577.89	66.4006	39.0866	142.361	scaffold_015.g411.t1	---NA---
EYC84_000629	266.97	216.763	613.553	42.1082	96.9675	141.337	scaffold_006.g629.t1	plasma membrane H+-ATPase
EYC84_004039	26.5421	28.1278	61.4313	0	0	14.9827	scaffold_002.g179.t1	guanine nucleotide-binding protein alpha subunit
EYC84_005590	61.951	47.6439	93.8301	0	12.7621	14.9736	scaffold_003.g621.t1	fatty acid elongase 2
EYC84_007428	128.045	132.306	69.2471	14.0986	18.3984	14.9685	scaffold_009.g116.t1	putative eukaryotic translation initiation factor 3 subunit A
EYC84_003148	15.4948	13.8376	25.2165	0	0	14.9602	scaffold_004.g290.t1	probable Na(+)/H(+) antiporter 1
EYC84_003068	86.4163	146.039	93.0687	10.8165	18.9048	14.9551	scaffold_004.g210.t1	eukaryotic peptide chain release factor subunit 1
EYC84_007326	10.9803	68.2751	60.3492	0	0	14.95	scaffold_009.g14.t1	Bcstl1
EYC84_007531	59.7575	75.2193	85.6648	14.1686	12.3597	14.9246	scaffold_009.g219.t1	eukaryotic translation initiation factor-like protein 3 subunit CLU1/TIF31
EYC84_005994	46.1795	47.7707	67.6965	10.2571	0	14.9032	scaffold_003.g1025.t1	apses-domain-containing protein
EYC84_003726	41.9439	34.492	54.8492	0	11.1628	14.8654	scaffold_004.g868.t1	MFS general substrate transporter
EYC84_005289	39.7829	62.2868	80.2736	0	12.8726	14.8367	scaffold_003.g320.t1	---NA---
EYC84_000275	57.3436	61.8018	119.277	0	17.6511	14.8041	scaffold_006.g275.t1	---NA---
EYC84_003534	35.2706	40.3161	92.8554	13.2006	0	14.7776	scaffold_004.g676.t1	---NA---
EYC84_009827	57.3911	57.4149	90.7301	0	16.3551	14.7714	scaffold_013.g548.t1	Actin/actin-like protein
EYC84_010309	42.0412	57.5326	49.607	0	15.7356	14.7561	scaffold_011.g460.t1	Coatomer, beta subunit
EYC84_001566	24.3097	27.2106	71.6969	0	0	14.7286	scaffold_005.g196.t1	S-adenosyl-L-methionine-dependent methyltransferase
EYC84_000817	26.3627	27.7753	62.6449	0	0	14.7246	scaffold_008.g134.t1	ZZ type zinc finger domain-containing protein
EYC84_004450	30.8988	25.2435	43.2539	14.859	0	14.696	scaffold_002.g590.t1	related to alpha-adaptin C
EYC84_008022	94.7839	110.106	91.2823	12.7701	17.2874	14.6807	scaffold_010.g44.t1	ATP synthase delta chain mitochondrial precursor
EYC84_003396	33.1982	50.5266	104.688	0	15.9847	14.6593	scaffold_004.g538.t1	major facilitator superfamily transporter protein
EYC84_001189	99.402	146.755	113.521	25.68	16.956	14.6553	scaffold_008.g506.t1	---NA---
EYC84_006382	15.4234	32.4203	52.133	16.6815	0	14.6521	scaffold_001.g334.t1	prenylated Rab acceptor 1 protein
EYC84_006974	26.4297	11.856	38.1818	0	0	14.6491	scaffold_001.g926.t1	putative pre-mrna splicing factor clf1 protein
EYC84_006261	35.0847	30.3949	42.9614	0	0	14.647	scaffold_001.g213.t1	cyclin domain-containing protein
EYC84_012053	75.0253	138.705	160.178	15.5627	18.3906	14.6204	scaffold_016.g409.t1	predicted protein
EYC84_010816	30.9182	38.0346	64.4998	0	11.1567	14.6031	scaffold_014.g287.t1	DUF1692-domain-containing protein
EYC84_001787	22.1897	52.5184	104.422	0	14.3987	14.5827	scaffold_005.g417.t1	---NA---
EYC84_011054	37.503	84.139	81.6617	0	12.1362	14.5674	scaffold_014.g525.t1	ubiquinol-cytochrome c reductase complex ubiquinone-binding protein
EYC84_008854	37.7061	65.2836	133.401	10.1938	11.8705	14.5623	scaffold_012.g199.t1	NAD(P)-binding protein
EYC84_010404	61.5597	80.1856	92.0641	0	12.4814	14.5145	scaffold_011.g555.t1	non-histone chromosomal protein 6
EYC84_008956	46.4152	60.1042	68.5698	0	11.2194	14.4891	scaffold_012.g301.t1	dihydrolipoamide succinyltransferase
EYC84_005751	24.4027	34.6323	72.1024	0	12.636	14.4858	scaffold_003.g782.t1	glycoside hydrolase family 16 protein
EYC84_002239	52.788	56.0164	78.9077	11.3214	11.4979	14.4797	scaffold_007.g104.t1	CK1/CK1 protein kinase
EYC84_002679	50.8734	51.6765	49.2591	0	13.5304	14.4623	scaffold_007.g544.t1	---NA---
EYC84_012069	139.284	210.681	111.273	23.4709	28.3087	14.297	scaffold_016.g425.t1	---NA---
EYC84_004203	22.1443	12.2343	46.0253	0	0	14.292	scaffold_002.g343.t1	carbohydrate-binding module family 1 protein
EYC84_002908	30.7799	26.236	56.8016	0	0	14.2277	scaffold_004.g50.t1	pathway-specific nitrogen regulator
EYC84_002718	17.725	17.5033	28.4512	0	0	14.1879	scaffold_007.g583.t1	related to DSF2 Deletion Suppressor of mptFive/pufFive mutation
EYC84_004005	28.6383	14.551	66.2696	0	0	14.1563	scaffold_002.g145.t1	cdp-alcohol phosphatidyltransferase protein
EYC84_003563	130.1	149.297	88.0925	23.6108	16.9714	14.1512	scaffold_004.g705.t1	eukaryotic translation initiation factor 3 subunit C
EYC84_011226	0	16.6557	59.4503	0	0	14.14	scaffold_015.g105.t1	hypothetical protein DID88_006373
EYC84_007724	46.521	51.8916	61.6242	0	16.5307	14.1389	scaffold_009.g412.t1	anaphase-promoting complex component Cut20 Apc4 protein
EYC84_009496	11.03	12.4445	43.1243	0	0	14.1022	scaffold_013.g217.t1	putative DENN (AEX-3) domain protein
EYC84_001289	146.031	123.193	86.902	37.4055	21.5644	14.0746	scaffold_008.g606.t1	elongation factor 3
EYC84_010437	26.3865	25.1759	40.8951	0	0	14.0695	scaffold_011.g588.t1	related to glutaredoxin
EYC84_010113	17.6104	20.986	45.6588	0	0	14.039	scaffold_011.g264.t1	DUF1765-domain-containing protein
EYC84_006265	163.929	120.571	522.883	24.0628	55.388	133.26	scaffold_001.g217.t1	hypothetical protein BCIN_01g04580
EYC84_000738	35.3354	27.9604	78.1289	0	0	13.9991	scaffold_008.g55.t1	Ferredoxin reductase-like, C-terminal NADP-linked
EYC84_010264	101.753	122.428	64.1277	23.0272	11.909	13.941	scaffold_011.g415.t1	GTP-binding protein YchF
EYC84_002754	59.5803	69.3782	61.5008	0	0	13.9135	scaffold_007.g619.t1	DnaJ-domain-containing protein
EYC84_005105	42.0325	41.6988	56.2187	0	11.0038	13.9033	scaffold_003.g136.t1	glycosyltransferase family 39 protein
EYC84_003909	24.2837	21.6271	27.2262	0	0	13.8757	scaffold_002.g49.t1	Alcohol acetyltransferase
EYC84_011323	17.7942	14.464	46.9758	0	0	13.8543	scaffold_015.g202.t1	hexose transporter
EYC84_005259	39.9147	36.2656	50.2927	13.8977	0	13.793	scaffold_003.g290.t1	related to DUF887 domain protein
EYC84_007580	70.7011	59.4302	68.9995	0	15.3608	13.7186	scaffold_009.g268.t1	26s proteasome regulatory subunit t2
EYC84_009460	0	0	40.0229	0	0	13.7186	scaffold_013.g181.t1	predicted protein
EYC84_010054	28.7118	39.1707	48.5874	10.8865	12.4823	13.7063	scaffold_011.g205.t1	related to MUC1 Extracellular alpha-1,4-glucan glucosidase
EYC84_000669	79.3821	48.6815	56.6817	0	10.9591	13.6482	scaffold_006.g669.t1	NADH-ubiquinone oxidoreductase 21kDa subunit
EYC84_004214	108.539	163.719	89.6062	20.5886	20.7142	13.6257	scaffold_002.g354.t1	RNA polymerase Rpc34
EYC84_003111	40.1395	18.5425	62.4337	0	0	13.6155	scaffold_004.g253.t1	related to AGA1 A-agglutinin anchor subunit
EYC84_006403	28.6815	24.845	43.0916	0	0	13.5941	scaffold_001.g355.t1	CCCH zinc finger
EYC84_005102	35.5451	58.1112	94.7109	11.9508	18.9158	13.5625	scaffold_003.g133.t1	putative N amino acid transport system protein
EYC84_000973	53.0431	65.132	59.2086	0	0	13.5288	scaffold_008.g290.t1	ATP-dependent RNA helicase sub2
EYC84_009512	0	0	189.547	0	0	13.491	scaffold_013.g233.t1	fungal alpha-L-arabinofuranosidase, putative
EYC84_001708	11.1165	21.9517	43.4754	0	0	13.4482	scaffold_005.g338.t1	putative cAMP-dependent protein kinase regulatory subunit
EYC84_000254	13.2818	16.534	40.339	0	0	13.442	scaffold_006.g254.t1	Pkinase-domain-containing protein
EYC84_011757	35.29	64.5967	50.3534	0	13.5093	13.339	scaffold_016.g113.t1	transcription factor protein
EYC84_001308	84.024	71.5743	72.0011	11.5857	15.7914	13.336	scaffold_008.g625.t1	putative 3-oxoacyl-reductase FabG
EYC84_008348	26.5464	13.5735	30.1783	0	0	13.2849	scaffold_010.g370.t1	cyclin-like protein
EYC84_003525	72.7714	74.3154	61.5385	0	11.0357	13.2809	scaffold_004.g667.t1	ubiquionol cytochrome C reductase hinge protein
EYC84_002400	90.7968	117.166	67.4166	0	19.2258	13.2707	scaffold_007.g265.t1	Isocitrate/isopropylmalate dehydrogenase
EYC84_008899	94.773	102.525	75.7064	21.2201	22.4929	13.2257	scaffold_012.g244.t1	dihydrolipoyl dehydrogenase
EYC84_001917	81.4739	107.992	59.0623	0	12.4246	13.185	scaffold_005.g547.t1	eukaryotic translation initiation factor 3 subunit g
EYC84_001584	46.1385	72.8246	81.2193	0	16.3887	13.1738	scaffold_005.g214.t1	asparagine synthetase
EYC84_008080	53.149	60.1992	70.0612	0	10.3632	13.1564	scaffold_010.g102.t1	putative NADH-ubiquinone oxidoreductase 21 kDa subunit
EYC84_008025	75.0751	81.7674	97.0737	10.2549	17.8865	13.1248	scaffold_010.g47.t1	GTP-binding protein SARA
EYC84_003546	97.0529	105.84	56.1093	18.9913	13.795	13.0809	scaffold_004.g688.t1	putative Eukaryotic translation initiation factor 4 gamma
EYC84_008814	62.0374	57.0882	61.6138	10.6921	14.0476	13.0809	scaffold_012.g159.t1	Coatomer, alpha subunit
EYC84_011699	71.0621	109.465	87.8525	14.0353	20.816	13.0788	scaffold_016.g55.t1	putative malate dehydrogenase, cytoplasmic
EYC84_006765	143.846	131.418	67.8196	28.1208	15.7746	13.0584	scaffold_001.g717.t1	eukaryotic translation initiation factor 3 subunit B
EYC84_011930	19.8904	17.602	30.8911	0	0	13.0584	scaffold_016.g286.t1	cell wall assembly and cell proliferation coordinating protein
EYC84_003720	0	13.2122	34.4775	0	0	13.0156	scaffold_004.g862.t1	septin AspB
EYC84_007217	103.726	107.59	77.6239	12.9055	14.5236	13.0156	scaffold_001.g1169.t1	glucose-6-phosphate 1-dehydrogenase
EYC84_006548	15.4234	43.8805	42.892	0	12.6713	13.0094	scaffold_001.g500.t1	oligosaccharyltransferase subunit ribophorin II protein
EYC84_006135	108.448	115.599	48.7698	17.6715	16.4723	13.0043	scaffold_001.g87.t1	fatty acid synthase-like protein subunit beta
EYC84_004178	123.785	77.4367	342.12	25.8485	55.8444	125.085	scaffold_002.g318.t1	Glucooligosaccharide oxidase
EYC84_006363	294.327	194.764	674.13	48.1697	76.0454	121.926	scaffold_001.g315.t1	hypothetical protein SBOR_1655
EYC84_002028	0	13.9435	27.4934	0	0	12.9891	scaffold_005.g658.t1	F-box/WD repeat-containing protein-like protein
EYC84_006452	39.6208	13.1139	47.2223	0	10.5949	12.9717	scaffold_001.g404.t1	kinase-like protein
EYC84_003106	139.006	142.372	86.0791	23.4578	14.1027	12.9524	scaffold_004.g248.t1	Eukaryotic translation initiation factor 3 subunit L
EYC84_009957	77.1929	101.991	72.1764	10.9608	14.8016	12.9513	scaffold_011.g108.t1	transcription factor HMG
EYC84_000514	117.693	117.571	69.9393	14.0353	18.2824	12.886	scaffold_006.g514.t1	dihydrolipoamide acetyltransferase component E2 of pyruvate dehydrogenase complex
EYC84_010248	15.471	18.9651	42.2355	0	0	12.886	scaffold_011.g399.t1	putative lim domain-containing protein
EYC84_010815	13.2602	22.5991	34.1709	0	0	12.8759	scaffold_014.g286.t1	putative Syntaxin-like protein psy1
EYC84_006751	66.3444	81.3959	72.2568	0	0	12.8279	scaffold_001.g703.t1	ATPase inhibitor, IATP, mitochondria
EYC84_003447	70.7227	91.7979	49.3731	15.9932	12.494	12.784	scaffold_004.g589.t1	D-3-phosphoglycerate dehydrogenase
EYC84_000252	48.6476	56.903	49.4738	0	0	12.7829	scaffold_006.g252.t1	10 kDa heat shock protein, mitochondrial
EYC84_001952	15.5618	22.6041	19.8337	0	0	12.7676	scaffold_005.g582.t1	phosphatidylinositol 4-kinase PIK1
EYC84_011126	39.6661	56.8641	59.2134	10.1916	0	12.7626	scaffold_015.g5.t1	Coatomer, beta' subunit
EYC84_008913	95.3718	91.3857	52.7435	10.1239	11.3031	12.7259	scaffold_012.g258.t1	eukaryotic translation initiation factor 3 subunit k
EYC84_000019	11.0754	33.8733	57.4111	0	0	12.7249	scaffold_006.g19.t1	glycosyltransferase family 15 protein
EYC84_007525	31.0112	22.2967	29.1867	0	0	12.7187	scaffold_009.g213.t1	ubiquitination network signaling protein
EYC84_007082	0	10.9073	122.749	0	0	12.7075	scaffold_001.g1034.t1	pectin lyase-like protein
EYC84_008927	28.6383	36.2002	59.9416	0	14.1114	12.7034	scaffold_012.g272.t1	TPR-like protein
EYC84_005427	161.176	182.798	114.346	28.8943	20.3369	12.6635	scaffold_003.g458.t1	ubiquitin-60S ribosomal protein L40 fusion protein
EYC84_004720	11.0754	18.6725	31.5185	0	0	12.6493	scaffold_002.g860.t1	glycerol:H+ symporter-like protein
EYC84_008063	17.7056	35.6178	50.3295	0	0	12.6218	scaffold_010.g85.t1	ap-1 complex subunit gamma-1
EYC84_004592	20.0697	19.2939	32.1257	0	0	12.5789	scaffold_002.g732.t1	probable Myosin-1
EYC84_005730	46.5016	36.5007	69.8925	0	0	12.5677	scaffold_003.g761.t1	---NA---
EYC84_011146	26.6372	12.9005	81.612	0	0	12.5565	scaffold_015.g25.t1	glycoside hydrolase family 72 protein
EYC84_008089	22.0579	31.6512	35.6972	0	0	12.5564	scaffold_010.g111.t1	glycosyltransferase family 15 protein
EYC84_001660	24.4265	21.2239	34.4325	0	0	12.5412	scaffold_005.g290.t1	glycosyltransferase family 62 protein
EYC84_003655	30.8923	30.456	38.8216	0	0	12.5402	scaffold_004.g797.t1	kinase-like protein
EYC84_004006	11.0949	18.7178	33.8585	0	0	12.535	scaffold_002.g146.t1	sn-1,2-diacylglycerol cholinephosphotransferas-like protein
EYC84_000737	92.6617	79.352	60.5361	11.4503	12.4383	12.5289	scaffold_008.g54.t1	ARM repeat-containing protein
EYC84_005924	26.5011	10.6711	32.0586	0	0	12.5024	scaffold_003.g955.t1	casein kinase I
EYC84_010708	13.2386	13.6819	34.5325	0	0	12.4983	scaffold_014.g179.t1	glycoside hydrolase family 16 protein
EYC84_004163	57.3566	0	50.3615	0	0	12.4707	scaffold_002.g303.t1	putative tripeptidyl-peptidase 1 precursor protein
EYC84_006504	130.53	127.85	58.4756	18.0013	16.5637	12.4617	scaffold_001.g456.t1	phosphopyruvate hydratase, putative
EYC84_011361	30.8944	20.2082	41.8163	0	0	12.4606	scaffold_015.g240.t1	glycoside hydrolase family 16 protein
EYC84_004047	39.8261	33.5409	71.8347	0	0	12.4595	scaffold_002.g187.t1	chitin binding protein
EYC84_007414	46.4994	58.1431	41.7111	0	10.5348	12.4555	scaffold_009.g102.t1	Preprotein translocase subunit
EYC84_007939	101.624	77.5113	65.0379	14.7957	15.376	12.4545	scaffold_009.g627.t1	ARM repeat-containing protein
EYC84_001990	59.8526	48.4439	81.95	0	15.4163	12.4483	scaffold_005.g620.t1	calmodulin
EYC84_000009	0	0	30.1969	0	0	12.432	scaffold_006.g9.t1	aspartyl protease
EYC84_006524	55.336	17.2622	39.7448	0	0	12.3953	scaffold_001.g476.t1	kelch domain-containing protein
EYC84_010450	83.6803	99.1667	84.5944	15.9867	13.6745	12.3913	scaffold_011.g601.t1	ATP synthase H chain, mitochondrial precursor
EYC84_001298	15.5812	0	22.6065	0	0	12.3075	scaffold_008.g615.t1	SMP-30 Gluconolaconase LRE-like region protein
EYC84_011151	17.7056	11.1473	20.7494	0	0	12.3075	scaffold_015.g30.t1	cytochrome P450
EYC84_009926	33.2392	39.929	55.8552	10.6877	0	12.3045	scaffold_011.g77.t1	putative nadh:ubiquinone oxidoreductase subunit protein
EYC84_009551	0	10.367	41.6482	0	0	12.2911	scaffold_013.g272.t1	putative Peroxisomal membrane protein PMP27
EYC84_006289	70.7465	110.893	82.0562	0	0	12.2861	scaffold_001.g241.t1	ATP sulfurylase
EYC84_001198	0	0	27.7534	0	0	12.2178	scaffold_008.g515.t1	glycoside hydrolase family 3 protein
EYC84_005091	37.4122	31.1544	48.1619	0	10.6895	12.2167	scaffold_003.g122.t1	serine/threonine protein phosphatase 2B catalytic subunit
EYC84_000098	22.0989	13.5276	39.1555	0	0	12.2106	scaffold_006.g98.t1	sec1 family protein
EYC84_009168	79.5204	101.797	68.3721	0	13.2754	12.2055	scaffold_012.g513.t1	acyl carrier protein
EYC84_010502	28.7269	19.3058	64.3724	0	0	12.1851	scaffold_011.g653.t1	serine/threonine protein kinase-like protein
EYC84_011443	11.0733	15.0938	41.5466	0	0	12.1728	scaffold_015.g322.t1	Thioredoxin-like fold protein
EYC84_001669	11.0041	16.9108	40.9537	0	0	12.1401	scaffold_005.g299.t1	---NA---
EYC84_001549	37.41	30.4945	41.4596	0	0	12.1249	scaffold_005.g179.t1	putative GTPase-activating protein GYP5
EYC84_005830	46.2227	90.6948	175.943	13.3405	0	12.1198	scaffold_003.g861.t1	GMC oxidoreductase
EYC84_004601	44.1569	56.5892	54.9483	13.5348	13.8824	12.1136	scaffold_002.g741.t1	UDP-N-acetylglucosamine pyrophosphorylase
EYC84_007063	24.4027	15.6966	24.2647	0	0	12.1136	scaffold_001.g1015.t1	---NA---
EYC84_005014	66.5713	44.7599	52.65	0	10.0105	12.0933	scaffold_003.g45.t1	uracil-DNA glycosylase-like protein
EYC84_003467	90.5893	73.0916	62.3765	11.5136	15.7013	12.0759	scaffold_004.g609.t1	seryl-tRNA synthetase
EYC84_006505	97.1048	135.758	48.7907	17.2431	16.0447	12.0658	scaffold_001.g457.t1	enolase
EYC84_007209	50.7632	32.9223	36.9278	0	0	12.0534	scaffold_001.g1161.t1	DUF726-domain-containing protein
EYC84_003793	19.845	20.1288	43.5686	0	0	12.0331	scaffold_004.g935.t1	thioredoxin-like protein
EYC84_006923	112.308	1077.26	606.912	27.3626	25.2335	117.248	scaffold_001.g875.t1	hypothetical protein DID88_003865
EYC84_000673	236.327	189.104	425.68	19.2644	57.6559	114.136	scaffold_006.g673.t1	glycoside hydrolase family 45 protein
EYC84_011924	413.041	340.259	520.797	56.8296	91.5842	112.484	scaffold_016.g280.t1	actin, gamma
EYC84_001918	106.287	122.313	78.7168	15.9255	16.8235	11.9638	scaffold_005.g548.t1	heat shock protein 70
EYC84_006800	50.8734	85.8388	73.8277	0	12.0884	11.9627	scaffold_001.g752.t1	mitochondrial ribosomal protein L44
EYC84_003524	48.7966	52.3551	41.327	0	0	11.926	scaffold_004.g666.t1	---NA---
EYC84_003638	28.5973	25.6758	54.0469	0	0	11.9249	scaffold_004.g780.t1	gti1 pac2 family protein
EYC84_006085	55.4765	90.0783	92.2933	13.9632	20.5166	11.9249	scaffold_001.g37.t1	peptidylprolyl isomerase
EYC84_006733	17.6364	42.2244	53.2999	0	0	11.9209	scaffold_001.g685.t1	putative Deoxyuridine 5'-triphosphate nucleotidohydrolase
EYC84_008565	31.1214	16.0066	46.7301	0	0	11.9035	scaffold_010.g587.t1	guanine nucleotide-binding protein beta subunit
EYC84_010191	19.979	27.7615	33.3711	0	0	11.8984	scaffold_011.g342.t1	ARM repeat-containing protein
EYC84_010219	50.6746	65.8968	78.0799	0	14.4899	11.8709	scaffold_011.g370.t1	---NA---
EYC84_000747	81.9149	111.243	66.6862	18.8316	14.2478	11.8647	scaffold_008.g64.t1	translation initiation factor 1A
EYC84_011156	48.507	34.5364	42.8542	0	0	11.8546	scaffold_015.g35.t1	probable protein kinase 1
EYC84_007266	35.4024	44.7683	49.1497	0	0	11.8371	scaffold_001.g1218.t1	class II peroxidase
EYC84_008906	59.6883	35.167	35.8092	0	0	11.8106	scaffold_012.g251.t1	RNA-binding domain-containing protein
EYC84_008860	68.6309	75.8485	91.869	0	13.5721	11.8056	scaffold_012.g205.t1	NADH-ubiquinone oxidoreductase subunit
EYC84_011871	0	0	34.1061	0	0	11.7678	scaffold_016.g227.t1	carbohydrate-binding module family 50 protein
EYC84_007711	19.912	19.1635	26.7239	0	0	11.7311	scaffold_009.g399.t1	STE-domain-containing protein
EYC84_000905	0	13.3047	34.9547	0	0	11.7137	scaffold_008.g222.t1	Pal1 cell morphology protein
EYC84_000923	13.3056	27.9275	32.0032	10.3904	0	11.6383	scaffold_008.g240.t1	NADH dehydrogenase, alpha subcomplex, subunit 2
EYC84_002415	11.0949	20.09	39.3936	0	0	11.6291	scaffold_007.g280.t1	ABC-2 type transporter
EYC84_005080	46.2725	67.8685	71.0724	20.7262	17.8708	11.6219	scaffold_003.g111.t1	NADH-ubiquinone oxidoreductase 78 kDa subunit mitochondrial precursor
EYC84_000757	44.1309	29.5086	50.0097	0	0	11.574	scaffold_008.g74.t1	SRF-type transcription factor
EYC84_005915	68.7605	95.0917	86.9518	0	18.2063	11.5667	scaffold_003.g946.t1	glutamate oxaloacetate transaminase 2
EYC84_010827	13.3078	12.1098	20.276	0	0	11.5526	scaffold_014.g298.t1	FCH-domain-containing protein
EYC84_008010	70.578	68.4381	54.11	14.1664	0	11.5424	scaffold_010.g32.t1	RNA recognition domain-containing protein
EYC84_011830	41.7429	67.4779	79.0814	11.3214	12.5804	11.5301	scaffold_016.g186.t1	RNB-domain-containing protein
EYC84_004854	10.9587	10.9396	35.8274	0	0	11.5036	scaffold_002.g994.t1	---NA---
EYC84_005172	30.7821	59.1848	53.8243	0	0	11.4913	scaffold_003.g203.t1	adenylate kinase
EYC84_011764	134.612	141.454	80.4938	20.0182	20.3218	11.4913	scaffold_016.g120.t1	centromere/microtubule-binding protein cbf5
EYC84_005976	26.4729	28.4268	59.5784	0	0	11.4658	scaffold_003.g1007.t1	dynein light chain
EYC84_006221	24.3551	24.0074	40.827	0	0	11.4629	scaffold_001.g173.t1	ANTH-domain-containing protein
EYC84_001558	28.6189	11.0891	28.4091	0	0	11.4505	scaffold_005.g188.t1	predicted protein
EYC84_002055	0	14.715	34.2093	0	0	11.4444	scaffold_005.g685.t1	Endosomal spry domain-containing protein
EYC84_000445	35.2252	22.7837	50.8886	0	0	11.4433	scaffold_006.g445.t1	---NA---
EYC84_000232	64.0018	64.3526	62.08	13.2684	10.6752	11.4281	scaffold_006.g232.t1	NADPH-cytochrome P450 reductase
EYC84_000722	0	0	19.268	0	0	11.423	scaffold_008.g39.t1	respiratory complex assembly protein Rmp1
EYC84_002949	30.7345	19.9315	40.4344	0	0	11.4016	scaffold_004.g91.t1	transcription factor bzip protein
EYC84_002667	42.0585	56.3598	52.9063	0	12.625	11.3842	scaffold_007.g532.t1	NADH dehydrogenase I, D subunit
EYC84_008096	94.9351	165.978	45.0456	13.2793	0	11.3842	scaffold_010.g118.t1	triosephosphate isomerase
EYC84_002380	55.2041	48.7681	72.5295	15.2896	11.9756	11.3791	scaffold_007.g245.t1	Coatomer, gamma subunit
EYC84_008378	0	10.6283	30.1386	0	0	11.3566	scaffold_010.g400.t1	S-adenosyl-L-methionine-dependent methyltransferase-like protein
EYC84_002135	15.4904	16.4692	49.019	0	0	11.3414	scaffold_005.g765.t1	rve domain containing protein
EYC84_011198	37.6132	49.8889	56.8605	10.2615	0	11.3362	scaffold_015.g77.t1	U-box-domain-containing protein
EYC84_001458	28.7572	40.6	46.5862	0	0	11.3352	scaffold_005.g88.t1	guanylate kinase
EYC84_003451	37.3192	43.846	50.0686	0	0	11.3352	scaffold_004.g593.t1	predicted protein
EYC84_003890	64.138	64.5065	49.3347	0	13.3316	11.3352	scaffold_002.g30.t1	tyrosyl-tRNA synthetase
EYC84_009098	15.4754	11.1501	30.9865	0	0	11.325	scaffold_012.g443.t1	IBR domain-containing protein
EYC84_000648	19.8882	14.2384	28.6098	0	0	11.3239	scaffold_006.g648.t1	---NA---
EYC84_001188	143.697	133.178	93.3972	18.4407	16.2126	11.2974	scaffold_008.g505.t1	---NA---
EYC84_001314	94.9222	62.906	66.1439	0	0	11.2658	scaffold_008.g631.t1	putative NADH-ubiquinone oxidoreductase 24 kDa subunit, mitochondrial
EYC84_011934	46.3849	45.4299	32.3607	0	11.6659	11.2434	scaffold_016.g290.t1	glycoside hydrolase family 63 protein
EYC84_002356	15.5834	20.0845	49.0601	0	0	11.2107	scaffold_007.g221.t1	putative er membrane protein
EYC84_005146	39.8693	61.41	54.1889	0	0	11.1954	scaffold_003.g177.t1	putative ATP synthase subunit e, mitochondrial
EYC84_004053	33.0664	74.157	105.786	0	0	11.1904	scaffold_002.g193.t1	glycosyltransferase family 2 protein
EYC84_008190	105.974	103.838	51.632	15.9189	13.7162	11.1904	scaffold_010.g212.t1	pyruvate dehydrogenase e1 component beta subunit
EYC84_003542	50.7913	39.4661	61.0456	0	11.2245	11.1893	scaffold_004.g684.t1	guanosine-diphosphatase-like protein
EYC84_000638	79.6371	119.496	133.667	10.3969	28.7318	11.1689	scaffold_006.g638.t1	cyanide hydratase
EYC84_005027	19.7974	20.561	32.0765	0	0	11.1628	scaffold_003.g58.t1	glycosyltransferase family 21 protein
EYC84_010564	21.965	12.6557	37.0559	0	0	11.1352	scaffold_014.g35.t1	ADP-ribosylation factor 6
EYC84_001667	19.9163	19.8887	41.7036	0	0	11.1087	scaffold_005.g297.t1	---NA---
EYC84_001694	17.7682	10.5826	28.8274	0	0	11.1087	scaffold_005.g324.t1	phosphoethanolamine cytidylyltransferas-like protein
EYC84_003058	0	18.3124	32.1088	0	0	11.1036	scaffold_004.g200.t1	related to bile acid ABC transport protein
EYC84_002709	37.4316	41.524	61.6	10.8187	0	11.0975	scaffold_007.g574.t1	putative sulfate permease 2
EYC84_005729	35.29	52.1096	70.891	0	11.4176	11.0822	scaffold_003.g760.t1	GTP-binding protein ypt1
EYC84_009989	22.0795	26.2721	38.7111	0	0	11.0659	scaffold_011.g140.t1	oxysterol-binding protein
EYC84_010061	28.6189	22.9617	48.232	0	0	11.0332	scaffold_011.g212.t1	calcium transporting P-type ATPase-like protein
EYC84_010591	0	27.0912	54.5424	0	0	11.0169	scaffold_014.g62.t1	c6 zinc finger domain-containing protein
EYC84_000223	24.3573	0	54.9564	0	0	11.0108	scaffold_006.g223.t1	aminopeptidase-like protein
EYC84_000538	22.1249	15.6733	44.5219	0	0	11.0006	scaffold_006.g538.t1	probable Ca2+-transport (H+/Ca2+ exchange) protein
EYC84_003200	106.235	89.5059	493.041	21.7729	50.5214	108.729	scaffold_004.g342.t1	pectin methyl esterase
EYC84_003395	152.29	117.809	257.678	29.0606	79.4898	107.05	scaffold_004.g537.t1	conserved hypothetical protein
EYC84_004109	126.193	86.3051	368.816	18.0734	43.7154	105.424	scaffold_002.g249.t1	---NA---
EYC84_004918	124.22	92.6906	247.423	30.5814	68.744	100.217	scaffold_002.g1058.t1	hypothetical protein CFIO01_12855
EYC84_003027	19.9379	11.6775	37.096	0	0	10.9944	scaffold_004.g169.t1	homeobox domain-containing protein
EYC84_007079	57.4343	30.0204	40.6416	0	0	10.973	scaffold_001.g1031.t1	---NA---
EYC84_005048	30.7799	20.1452	36.089	0	0	10.9639	scaffold_003.g79.t1	related to EDE1 protein
EYC84_001589	41.8553	52.5167	62.3774	14.6647	12.5981	10.9628	scaffold_005.g219.t1	msp domain-containing protein
EYC84_009176	30.8923	0	36.0138	0	0	10.9526	scaffold_012.g521.t1	glycoside hydrolase family 76 protein
EYC84_005686	22.0363	25.0062	45.8532	0	0	10.9465	scaffold_003.g717.t1	long-chain-fatty-acid-CoA ligase-like protein
EYC84_003647	35.6099	42.6928	46.235	0	0	10.9464	scaffold_004.g789.t1	putative metal ion transporter C27B12.12c
EYC84_011241	30.7821	24.2024	28.6319	0	0	10.9363	scaffold_015.g120.t1	ArfGap-domain-containing protein
EYC84_002490	11.0279	19.4458	44.955	0	0	10.9211	scaffold_007.g355.t1	SWI-SNF chromatin-remodeling complex protein
EYC84_005755	41.9937	49.1222	64.3877	12.2784	12.8255	10.9098	scaffold_003.g786.t1	related to ERP2-p24 protein involved in membrane trafficking
EYC84_002520	11.0538	16.0865	25.3137	0	0	10.9077	scaffold_007.g385.t1	Golgi mannosyltransferase complex subunit
EYC84_007092	13.2148	22.4325	39.0017	0	12.2061	10.8924	scaffold_001.g1044.t1	3-hydroxyacyl-CoA dehydrogenase-like protein
EYC84_006689	50.8778	61.298	79.1517	12.8356	14.8962	10.8771	scaffold_001.g641.t1	eukaryotic phosphomannomutase
EYC84_010764	138.919	193.28	97.8148	22.3411	19.1459	10.876	scaffold_014.g235.t1	small nucleolar ribonucleoprotein SNU13
EYC84_010394	53.3349	52.0738	38.7417	0	11.0097	10.8648	scaffold_011.g545.t1	Taz1-interactin-like proteing factor 1
EYC84_008721	48.7534	50.3222	55.3317	0	0	10.8608	scaffold_012.g66.t1	related to NADH-ubiquinone oxidoreductase B16.6 subunit
EYC84_003133	55.3641	41.157	57.7752	0	0	10.8547	scaffold_004.g275.t1	SCF complex subunit Skp1
EYC84_003940	112.853	119.58	70.3149	24.8519	13.2281	10.8383	scaffold_002.g80.t1	IMP dehydrogenase
EYC84_005528	61.8083	41.3875	36.8279	0	0	10.8373	scaffold_003.g559.t1	calcium/calmodulin-dependent protein kinase
EYC84_004938	0	21.8783	39.3366	0	0	10.8282	scaffold_002.g1078.t1	ER protein BIG1
EYC84_005570	11.0041	0	21.5507	0	0	10.8231	scaffold_003.g601.t1	RGS-domain-containing protein
EYC84_001684	0	0	15.7136	0	0	10.7537	scaffold_005.g314.t1	predicted protein
EYC84_008170	39.6424	17.7794	40.2174	0	0	10.7414	scaffold_010.g192.t1	probable protein glass
EYC84_011442	13.2365	18.5526	30.6516	0	0	10.6924	scaffold_015.g321.t1	2-hydroxyphytanoyl- lyase protein
EYC84_009202	42.0109	40.4837	64.4128	0	0	10.6873	scaffold_012.g547.t1	CBS-domain-containing protein
EYC84_008513	24.5345	17.7416	34.3618	0	0	10.6822	scaffold_010.g535.t1	aquaporin-like protein
EYC84_001884	0	17.5263	66.9537	0	0	10.6293	scaffold_005.g514.t1	MFS general substrate transporter
EYC84_007251	24.2643	15.3072	43.5181	0	0	10.6159	scaffold_001.g1203.t1	phosphatidylinositol 3
EYC84_003962	0	11.0472	24.1324	0	0	10.6006	scaffold_002.g102.t1	kinesin-domain-containing protein
EYC84_007275	37.5937	30.4485	37.6416	0	0	10.5955	scaffold_001.g1227.t1	calcium ATPase
EYC84_008277	13.2602	11.4504	31.1152	0	0	10.5904	scaffold_010.g299.t1	Microtubule-associated MAP65 ASE1-type protein
EYC84_012102	134.785	147.025	76.1582	36.6628	18.028	10.5853	scaffold_016.g458.t1	curved DNA-binding protein-like protein
EYC84_005786	37.8639	21.3987	46.5396	0	0	10.5843	scaffold_003.g817.t1	diphosphomevalonate decarboxylase
EYC84_009565	0	16.847	47.2077	0	0	10.573	scaffold_013.g286.t1	probable ROD1-O-dinitrobenzene,calcium and zinc resistance protein
EYC84_008582	41.8575	36.0378	59.7781	10.7576	0	10.5578	scaffold_010.g604.t1	ribosomal L24E protein
EYC84_011289	0	12.4046	26.9438	0	0	10.5578	scaffold_015.g168.t1	related to GTP-binding protein
EYC84_004766	33.0858	58.4504	70.8157	0	10.2135	10.5415	scaffold_002.g906.t1	DUF1909-domain-containing protein
EYC84_009575	70.7659	69.8894	59.9376	12.0796	0	10.5364	scaffold_013.g296.t1	HSP20-like chaperone
EYC84_004564	0	21.6378	34.9814	0	0	10.5251	scaffold_002.g704.t1	glycoside hydrolase family 47 protein
EYC84_012143	46.413	17.8332	46.1901	0	0	10.5251	scaffold_016.g499.t1	cell division control protein 42
EYC84_001767	22.1033	23.7174	39.7522	0	0	10.4976	scaffold_005.g397.t1	MFS multidrug transporter-like protein
EYC84_010445	42.0844	40.4711	51.1736	15.5561	0	10.4761	scaffold_011.g596.t1	26S protease regulatory subunit 6A
EYC84_002435	20.0006	10.8494	63.1638	0	0	10.4609	scaffold_007.g300.t1	hypothetical protein SBOR_7685
EYC84_004207	26.4816	28.4297	50.2723	0	0	10.4282	scaffold_002.g347.t1	V0/A0 complex, 116-kDa subunit of ATPase
EYC84_007297	46.3201	43.0328	52.8058	0	10.2828	10.418	scaffold_001.g1249.t1	clathrin heavy chain
EYC84_000510	37.6651	44.6297	86.4482	0	19.4776	10.4068	scaffold_006.g510.t1	related to glutathione S-transferase III
EYC84_002930	139.334	409.206	155.946	26.8797	31.2652	10.3905	scaffold_004.g72.t1	40S ribosomal protein S25
EYC84_008681	22.1897	11.5104	32.6408	0	0	10.3843	scaffold_012.g26.t1	HCP-like protein
EYC84_009252	0	28.5581	32.7519	0	0	10.3752	scaffold_012.g597.t1	probable ASF1-anti-silencing protein
EYC84_010004	17.7682	12.4565	20.9334	0	0	10.364	scaffold_011.g155.t1	GTP-binding protein rho2
EYC84_000668	44.2908	92.5545	83.6828	14.173	11.3367	10.3629	scaffold_006.g668.t1	mitochondrial F1F0 ATP synthase-like protein subunit F
EYC84_011117	26.5637	0	0	0	0	10.3414	scaffold_014.g588.t1	glucose oxidase
EYC84_000067	13.1932	11.4957	21.5289	0	0	10.3364	scaffold_006.g67.t1	family A G protein-coupled receptor-like protein
EYC84_008750	30.9614	40.4299	49.3907	0	0	10.3313	scaffold_012.g95.t1	26S proteasome non-ATPase regulatory subunit 3 protein
EYC84_002295	50.6011	26.4642	84.5083	10.9542	0	10.2925	scaffold_007.g160.t1	Oligopeptide transporter OPT superfamily
EYC84_001655	70.8329	92.1843	90.8038	27.3427	12.4088	10.2598	scaffold_005.g285.t1	ubiquinol-cytochrome c reductase complex 14 kDa protein
EYC84_010854	19.912	33.2144	28.4231	0	0	10.2558	scaffold_014.g325.t1	related to SEC31 protein
EYC84_008840	21.965	19.4155	29.2796	0	0	10.2507	scaffold_012.g185.t1	SAICAR synthase-like protein
EYC84_007696	70.4654	56.4216	60.8984	0	12.45	10.2496	scaffold_009.g384.t1	Microtuble-associated protein EB1
EYC84_004391	24.3767	13.384	38.7196	0	0	10.2272	scaffold_002.g531.t1	probable AVT3-involved in amino acid efflux from the vacuole
EYC84_009745	19.8018	12.1359	25.9101	0	0	10.2057	scaffold_013.g466.t1	related to SNF5-component of SWI/SNF transcription activator complex
EYC84_000199	39.6683	63.1393	35.0576	10.7488	11.4793	10.1904	scaffold_006.g199.t1	t-complex protein 1
EYC84_001714	62.2146	47.0352	48.8187	0	0	10.1904	scaffold_005.g344.t1	CNDP dipeptidase
EYC84_003680	15.5186	0	40.109	0	0	10.1844	scaffold_004.g822.t1	integral membrane protein TmpA
EYC84_003902	15.3802	50.4788	49.0753	14.2974	0	10.1792	scaffold_002.g42.t1	oligosaccharyltransferase alpha subunit
EYC84_009169	33.1246	45.5027	48.5043	0	0	10.1476	scaffold_012.g514.t1	NADH-quinone oxidoreductase
EYC84_010615	0	31.7685	10.1502	0	20.6438	10.1415	scaffold_014.g86.t1	Acid phosphatase precursor
EYC84_008072	39.6424	39.7111	54.2804	0	10.619	10.1201	scaffold_010.g94.t1	basic region leucine zipper
EYC84_001750	39.9191	52.8505	48.8456	0	0	10.1088	scaffold_005.g380.t1	G2/M phase checkpoint control protein Sum2, putative
EYC84_003090	33.1312	17.5602	30.4468	0	0	10.1038	scaffold_004.g232.t1	Pathogenicity factor protein
EYC84_003521	35.2965	13.9079	44.8919	0	0	10.1037	scaffold_004.g663.t1	orotidine-5'-phosphate decarboxylase
EYC84_000686	28.7053	18.0386	33.6008	0	0	10.0936	scaffold_008.g3.t1	glucosamine-phosphate N-acetyltransferase
EYC84_009626	17.6126	19.5815	38.774	0	0	10.0936	scaffold_013.g347.t1	DUF21-domain-containing protein
EYC84_005218	53.1512	45.2079	79.7286	0	17.0166	10.0823	scaffold_003.g249.t1	vacuolar ATP synthase catalytic subunit A
EYC84_007118	17.7034	13.9918	29.4339	0	0	10.0333	scaffold_001.g1070.t1	DUF1748-domain-containing protein
EYC84_009848	24.2687	33.1193	75.0543	0	16.943	10.0271	scaffold_013.g569.t1	MFS general substrate transporter
EYC84_002182	15.497	0	28.7293	0	0	10.0119	scaffold_007.g47.t1	putative endoglucanase-1 precursor
EYC84_002171	35.383	18.5943	41.2895	0	0	10.0068	scaffold_007.g36.t1	BcBOA8 protein
EYC84_000005	35.2296	38.4663	36.3239	0	0	0	scaffold_006.g5.t1	carbon-nitrogen hydrolase
EYC84_000010	30.9874	48.0342	20.4122	0	0	0	scaffold_006.g10.t1	GMP synthase
EYC84_000012	11.0733	17.3374	13.2271	0	0	0	scaffold_006.g12.t1	CHCH domain-containing protein
EYC84_000013	0	26.3611	12.9385	0	0	0	scaffold_006.g13.t1	dihydrolipoamide acetyltransferase component of pyruvate dehydrogenase protein
EYC84_000018	37.7493	23.4317	21.6684	0	0	0	scaffold_006.g18.t1	topoisomerase II-associated protein PAT1
EYC84_000020	39.6661	40.2341	28.356	0	0	0	scaffold_006.g20.t1	ribosomal protein S12
EYC84_000025	0	18.4771	49.6937	0	0	0	scaffold_006.g25.t1	formate nitrite transporter family protein
EYC84_000029	33.1938	25.7728	16.5274	0	0	0	scaffold_006.g29.t1	nonsense-mediated mRNA decay protein 3
EYC84_000030	86.0597	0	0	0	0	0	scaffold_006.g30.t1	putative Alpha-ketoglutarate-dependent sulfonate dioxygenase
EYC84_000036	0	0	13.8542	0	0	0	scaffold_006.g36.t1	ubiquitin-like protein
EYC84_000037	28.688	24.4692	29.6083	0	0	0	scaffold_006.g37.t1	20S proteasome maturation protein
EYC84_000042	19.8471	18.3197	12.2628	0	0	0	scaffold_006.g42.t1	pyrroline-5-carboxylate reductase
EYC84_000048	35.45	37.8695	30.8543	0	0	0	scaffold_006.g48.t1	GYF domain-containing protein
EYC84_000054	24.3141	0	0	0	0	0	scaffold_006.g54.t1	related to L-ornithine N5-hydroxylase
EYC84_000057	26.4059	21.2075	16.1072	0	0	0	scaffold_006.g57.t1	putative calcium-transporting ATPase (P-type ATPase) protein
EYC84_000058	15.4472	14.0056	0	0	0	0	scaffold_006.g58.t1	putative calcium-transporting ATPase (P-type ATPase) protein
EYC84_000059	13.284	14.3324	39.2708	0	0	0	scaffold_006.g59.t1	Hydroxyacyl dehydrogenase
EYC84_000071	11.03	10.4876	0	0	0	0	scaffold_006.g71.t1	hypothetical protein DID88_005474
EYC84_000076	22.2135	11.8037	0	0	0	0	scaffold_006.g76.t1	SH3 domain-containing protein
EYC84_000079	0	26.7238	17.2373	0	0	0	scaffold_006.g79.t1	37S ribosomal mrp51 mitochondrial protein
EYC84_000083	0	0	15.6263	0	0	0	scaffold_006.g83.t1	related to general repressor of transcription
EYC84_000088	30.8469	34.7254	34.8609	0	0	0	scaffold_006.g88.t1	ubiquitin-activating enzyme E1
EYC84_000089	13.3272	0	15.6729	0	0	0	scaffold_006.g89.t1	MFS general substrate transporter
EYC84_000090	0	0	15.4778	0	0	0	scaffold_006.g90.t1	n -glutamine methyltransferase mtq2
EYC84_000095	17.7034	0	0	0	0	0	scaffold_006.g95.t1	general substrate transporter
EYC84_000099	22.0536	17.3253	24.9911	0	0	0	scaffold_006.g99.t1	related to U1 SMALL NUCLEAR RIBONUCLEOPROTEIN C
EYC84_000100	0	15.1951	0	0	0	0	scaffold_006.g100.t1	putative ribosome biogenesis protein urb1 protein
EYC84_000101	0	0	12.7625	0	0	0	scaffold_006.g101.t1	vacuolar membrane-associated protein-like protein IML1
EYC84_000105	13.1932	33.7492	13.9841	0	0	0	scaffold_006.g105.t1	related to ATP-dependent RNA helicase SUV3, mitochondrial precursor
EYC84_000112	11.1186	0	0	0	0	0	scaffold_006.g112.t1	related to GSG1-sporulation specific protein
EYC84_000120	19.9574	13.2581	21.425	0	0	0	scaffold_006.g120.t1	glycoside hydrolase family 125 protein
EYC84_000121	0	0	11.0637	0	0	0	scaffold_006.g121.t1	related to autoinducer 2 sensor kinase/phosphatase luxQ
EYC84_000127	0	11.4714	42.9956	0	0	0	scaffold_006.g127.t1	hypothetical protein BO97DRAFT_424479
EYC84_000128	0	11.5166	22.2873	0	0	0	scaffold_006.g128.t1	putative glucose dehydrogenase
EYC84_000130	0	16.6232	89.9372	0	0	0	scaffold_006.g130.t1	Short-chain dehydrogenase/reductase SDR
EYC84_000131	0	0	12.2811	0	0	0	scaffold_006.g131.t1	FAD binding domain-containing protein
EYC84_000139	22.1033	41.2402	36.8333	0	0	0	scaffold_006.g139.t1	NAD(P)-binding protein
EYC84_000145	15.4754	0	0	0	0	0	scaffold_006.g145.t1	spindle pole body-associated sad1 protein
EYC84_000146	19.752	17.6427	22.8069	0	0	0	scaffold_006.g146.t1	phosphoadenosine phosphosulfate reductase protein
EYC84_000148	0	23.6529	12.4521	0	0	0	scaffold_006.g148.t1	ATP-dependent RNA helicase dbp10
EYC84_000150	0	19.1211	11.4168	0	0	0	scaffold_006.g150.t1	ARM-like repeat-containing protein
EYC84_000151	0	19.0456	15.6873	0	0	0	scaffold_006.g151.t1	isopentenyl-diphosphate Delta-isomerase 1
EYC84_000152	13.1219	0	19.1641	0	0	0	scaffold_006.g152.t1	acetyltransferase protein
EYC84_000153	11.0063	0	0	0	0	0	scaffold_006.g153.t1	replication protein A, subunit RPA32
EYC84_000159	31.0782	18.523	11.1995	0	0	0	scaffold_006.g159.t1	putative Deoxyhypusine hydroxylase
EYC84_000162	10.9349	15.4293	12.2325	0	0	0	scaffold_006.g162.t1	phosphatidylethanolamine N-methyltransferase
EYC84_000166	10.9587	13.649	0	0	0	0	scaffold_006.g166.t1	quino amine dehydrogenase beta chain protein
EYC84_000174	15.445	13.5715	40.1565	0	0	0	scaffold_006.g174.t1	GCN5-related N-acetyltransferas-like protein
EYC84_000182	13.284	24.3225	0	0	0	0	scaffold_006.g182.t1	DUF663-domain-containing protein
EYC84_000184	31.0998	29.7739	15.3155	0	0	0	scaffold_006.g184.t1	alpha-ketoacid dehydrogenase kinase
EYC84_000187	0	10.0607	0	0	0	0	scaffold_006.g187.t1	mitosis protein dim1
EYC84_000189	15.5618	15.2327	55.1232	0	0	0	scaffold_006.g189.t1	Thiolase-like protein
EYC84_000192	10.9825	0	0	0	0	0	scaffold_006.g192.t1	glycosyltransferase family 58 protein
EYC84_000196	0	12.8343	17.4245	0	0	0	scaffold_006.g196.t1	acyl-CoA dehydrogenase-like protein
EYC84_000197	24.2643	22.2875	32.1798	0	0	0	scaffold_006.g197.t1	protein kinase C
EYC84_000198	44.0877	39.4108	21.4188	0	0	0	scaffold_006.g198.t1	prolyl-tRNA synthetase
EYC84_000206	15.4926	18.4075	20.3415	0	0	0	scaffold_006.g206.t1	pentatricopeptide repeat domain-containing protein
EYC84_000208	0	0	11.0777	0	0	0	scaffold_006.g208.t1	glycoside hydrolase family 28 protein
EYC84_000210	11.0495	19.4399	34.8182	0	0	0	scaffold_006.g210.t1	hypothetical protein DID88_005338
EYC84_000211	64.3628	43.2714	26.259	0	0	0	scaffold_006.g211.t1	multisynthetase complex auxiliary component p43
EYC84_000213	0	0	11.0148	0	0	0	scaffold_006.g213.t1	probable pathway-specific regulatory protein nit-4
EYC84_000214	0	0	17.7285	0	0	0	scaffold_006.g214.t1	MFS multidrug transporter-like protein
EYC84_000215	0	12.3878	0	0	0	0	scaffold_006.g215.t1	related to histidine triad protein member
EYC84_000216	0	10.3391	21.2745	0	0	0	scaffold_006.g216.t1	gamma interferon inducible lysosomal thiol reductase protein
EYC84_000218	17.6558	12.8384	0	0	0	0	scaffold_006.g218.t1	related to myb-related protein cdc5
EYC84_000219	42.0412	35.825	18.5997	0	0	0	scaffold_006.g219.t1	DNA/RNA polymerase
EYC84_000220	17.6126	21.3885	13.8418	0	0	0	scaffold_006.g220.t1	ATPase synthesis protein 25
EYC84_000222	42.0585	26.278	34.8142	0	0	0	scaffold_006.g222.t1	AFG1-like ATPase
EYC84_000225	41.9051	30.1472	12.7967	0	0	0	scaffold_006.g225.t1	holo-acyl-carrier-protein synthase
EYC84_000227	0	0	12.1879	0	0	0	scaffold_006.g227.t1	c6 zinc finger domain containing protein
EYC84_000231	0	0	14.1952	0	0	0	scaffold_006.g231.t1	cell morphogenesis protein PAG1
EYC84_000235	0	10.2658	0	0	0	0	scaffold_006.g235.t1	kinase-like protein
EYC84_000236	22.0579	32.5916	35.9669	0	0	0	scaffold_006.g236.t1	26S proteasome non-ATPase regulatory subunit 2
EYC84_000242	0	11.9109	0	0	0	0	scaffold_006.g242.t1	sequence orphan
EYC84_000244	17.8374	17.5346	17.605	0	0	0	scaffold_006.g244.t1	cytoplasmic dynein 1 heavy chain 1
EYC84_000246	48.8053	51.8649	31.6195	16.4915	0	0	scaffold_006.g246.t1	probable mitochondrial import receptor subunit tom-20
EYC84_000247	0	12.57	14.463	0	0	0	scaffold_006.g247.t1	serine/threonine-protein phosphatase pp2a catalytic subunit
EYC84_000248	42.1298	41.8604	48.7541	0	0	0	scaffold_006.g248.t1	serine/threonine-protein phosphatase pp2a catalytic subunit
EYC84_000251	0	14.5243	0	0	0	0	scaffold_006.g251.t1	wyosine base formation
EYC84_000255	35.156	22.1589	12.3159	0	0	0	scaffold_006.g255.t1	probable 60S ribosomal protein L19, mitochondrial precursor
EYC84_000266	15.4472	22.2388	31.098	0	0	0	scaffold_006.g266.t1	putative V-ATPase proteolipid subunit Ppa1
EYC84_000271	0	10.9492	0	0	0	0	scaffold_006.g271.t1	mitotic checkpoint protein-like protein BUB3
EYC84_000273	46.3006	24.2334	31.7111	0	0	0	scaffold_006.g273.t1	DNA-binding domain of Mlu1-box binding protein MBP1
EYC84_000276	13.1457	12.8113	15.902	0	0	0	scaffold_006.g276.t1	Metallo-dependent phosphatase
EYC84_000278	0	0	12.1152	0	0	0	scaffold_006.g278.t1	ARM repeat-containing protein
EYC84_000282	0	0	21.1083	0	0	0	scaffold_006.g282.t1	DUF323 domain protein
EYC84_000287	0	10.4115	16.316	0	0	0	scaffold_006.g287.t1	COPI associated protein
EYC84_000293	0	13.3525	13.4545	0	0	0	scaffold_006.g293.t1	regulator of chromosome condensation
EYC84_000295	13.1219	0	12.8619	0	0	0	scaffold_006.g295.t1	hypothetical protein BCIN_12g04270
EYC84_000305	19.9617	14.02	15.0517	0	0	0	scaffold_006.g305.t1	glycosyltransferase 2 protein
EYC84_000306	11.0517	0	0	0	0	0	scaffold_006.g306.t1	putative adaptin ear-binding coat-associated protein 1
EYC84_000307	19.7304	15.8512	0	0	0	0	scaffold_006.g307.t1	translation initiation factor-like protein eif-2b subunit alpha
EYC84_000310	11.0063	0	10.2414	0	0	0	scaffold_006.g310.t1	probable glycerol-3-phosphate acyltransferase
EYC84_000312	24.4243	12.6742	13.3062	0	0	0	scaffold_006.g312.t1	DUF221-domain-containing protein
EYC84_000320	0	35.6868	18.4699	0	0	0	scaffold_006.g320.t1	Ribose 5-phosphate isomerase
EYC84_000321	13.2581	12.4891	0	0	0	0	scaffold_006.g321.t1	related to auxin-resistance protein
EYC84_000324	10.9349	0	0	0	0	0	scaffold_006.g324.t1	sulfate transporter protein
EYC84_000329	0	10.5277	15.0397	0	0	0	scaffold_006.g329.t1	---NA---
EYC84_000331	0	14.6659	0	0	0	0	scaffold_006.g331.t1	alpha-13-mannosyltransferase (Alg3) protein
EYC84_000350	0	21.9621	0	0	0	0	scaffold_006.g350.t1	biotin synthase
EYC84_000351	11.0063	15.0404	24.7699	0	0	0	scaffold_006.g351.t1	GDP-mannose transporter
EYC84_000353	17.7488	12.6772	18.6322	0	0	0	scaffold_006.g353.t1	vacuolar protein sorting protein-like protein
EYC84_000354	0	0	20.244	0	0	0	scaffold_006.g354.t1	related to leucine permease transcriptional regulator
EYC84_000359	0	12.5723	27.7918	0	0	0	scaffold_006.g359.t1	SH3 domain-containing protein
EYC84_000360	13.2624	0	13.2271	0	0	0	scaffold_006.g360.t1	---NA---
EYC84_000371	97.1286	62.1968	51.6496	19.2644	13.0294	0	scaffold_006.g371.t1	predicted protein
EYC84_000374	11.03	0	0	0	0	0	scaffold_006.g374.t1	---NA---
EYC84_000376	13.3942	17.9659	29.99	0	0	0	scaffold_006.g376.t1	Adaptor protein complex beta subunit
EYC84_000384	0	0	13.7242	0	0	0	scaffold_006.g384.t1	related to apyrase (NDPase/NTPase)
EYC84_000386	15.4472	21.9679	13.215	0	0	0	scaffold_006.g386.t1	3' exoribonuclease family protein
EYC84_000387	15.6266	0	0	0	0	0	scaffold_006.g387.t1	---NA---
EYC84_000389	19.9141	22.5333	18.3638	0	0	0	scaffold_006.g389.t1	related to DNA-directed RNA polymerase chain RPB8
EYC84_000394	0	0	10.1766	0	0	0	scaffold_006.g394.t1	ubiquitin-protein ligase-like protein
EYC84_000396	0	10.7866	0	0	0	0	scaffold_006.g396.t1	tRNA-splicing endonuclease subunit Sen34
EYC84_000397	35.29	26.4878	43.1096	0	11.3759	0	scaffold_006.g397.t1	Mannan polymerase II complex ANP1 subunit
EYC84_000398	0	12.8793	14.7048	0	0	0	scaffold_006.g398.t1	Sec7 domain-containing protein
EYC84_000404	17.6774	12.9543	0	0	0	0	scaffold_006.g404.t1	mitochondrial division protein
EYC84_000407	13.351	13.2485	0	0	0	0	scaffold_006.g407.t1	probable Protein BCP1
EYC84_000412	11.0257	22.2968	0	0	0	0	scaffold_006.g412.t1	predicted protein
EYC84_000416	0	12.6599	0	0	0	0	scaffold_006.g416.t1	L domain-like protein
EYC84_000420	0	15.0506	14.3334	0	0	0	scaffold_006.g420.t1	RNA recognition domain-containing protein
EYC84_000421	26.4989	23.2756	33.8403	0	0	0	scaffold_006.g421.t1	vacuolar ATP synthase subunit d
EYC84_000422	30.9182	25.551	25.5919	0	0	0	scaffold_006.g422.t1	pre-mRNA-splicing factor syf1
EYC84_000426	0	0	11.3011	0	0	0	scaffold_006.g426.t1	Zn2Cys6 transcription factor
EYC84_000436	28.7075	41.8618	18.6462	14.5204	0	0	scaffold_006.g436.t1	carbamoyl-phosphate synth
EYC84_000438	13.2581	0	0	0	0	0	scaffold_006.g438.t1	---NA---
EYC84_000439	19.9833	0	0	0	0	0	scaffold_006.g439.t1	NUDIX domain-containing protein
EYC84_000442	42.1449	60.5864	38.87	0	0	0	scaffold_006.g442.t1	sulphite reductase hemo protein, beta subunit
EYC84_000444	24.3983	17.945	41.717	0	0	0	scaffold_006.g444.t1	DUF1753-domain-containing protein
EYC84_000447	35.249	22.2264	10.546	0	0	0	scaffold_006.g447.t1	related to myosin heavy chain proteins
EYC84_000450	11.1619	0	0	0	0	0	scaffold_006.g450.t1	NAD(P)-binding protein
EYC84_000452	0	0	13.5763	0	0	0	scaffold_006.g452.t1	---NA---
EYC84_000453	13.3078	20.0351	14.8041	0	0	0	scaffold_006.g453.t1	probable external NADH-ubiquinone oxidoreductase 2, mitochondrial precursor
EYC84_000455	17.7272	31.2027	28.2892	0	0	0	scaffold_006.g455.t1	putative NADH dehydrogenase
EYC84_000456	0	13.0928	0	0	0	0	scaffold_006.g456.t1	uridine kinase
EYC84_000459	15.5812	0	0	0	0	0	scaffold_006.g459.t1	predicted protein
EYC84_000462	0	0	17.1767	0	0	0	scaffold_006.g462.t1	MFS general substrate transporter
EYC84_000463	0	0	12.4436	0	0	0	scaffold_006.g463.t1	---NA---
EYC84_000465	0	0	14.3738	0	0	0	scaffold_006.g465.t1	putative Inositol polyphosphate multikinase
EYC84_000466	0	0	11.1001	0	0	0	scaffold_006.g466.t1	Clp1-domain-containing protein
EYC84_000468	13.2862	16.8365	10.6659	0	0	0	scaffold_006.g468.t1	WD40 repeat-like protein
EYC84_000469	15.3089	0	0	0	0	0	scaffold_006.g469.t1	3-hydroxyisobutyrate dehydrogenase-like protein
EYC84_000470	11.0495	0	0	0	0	0	scaffold_006.g470.t1	acetyltransferase protein
EYC84_000486	30.7367	41.671	28.5202	0	0	0	scaffold_006.g486.t1	---NA---
EYC84_000489	17.6818	18.3968	10.1463	0	0	0	scaffold_006.g489.t1	---NA---
EYC84_000490	61.8192	79.9796	46.5842	13.6069	12.581	0	scaffold_006.g490.t1	elongation factor 3
EYC84_000491	64.1208	75.4825	33.505	12.8422	0	0	scaffold_006.g491.t1	putative elongation factor 3
EYC84_000504	0	0	13.5682	0	0	0	scaffold_006.g504.t1	D-lactonohydrolase-like protein-like protein
EYC84_000511	22.1227	17.5677	15.9163	0	0	0	scaffold_006.g511.t1	siroheme synthase middle domains-like protein
EYC84_000512	0	0	15.4152	0	0	0	scaffold_006.g512.t1	probable vacuolar segregation protein pep7
EYC84_000513	0	13.1202	0	0	0	0	scaffold_006.g513.t1	---NA---
EYC84_000515	13.2127	16.5569	18.1712	0	0	0	scaffold_006.g515.t1	Sec7-domain-containing protein
EYC84_000517	11.1186	11.0229	10.3248	0	0	0	scaffold_006.g517.t1	Zinc finger RING FYVE PHD-type protein
EYC84_000526	20.0697	0	0	0	0	0	scaffold_006.g526.t1	snare protein syntaxin-like protein 18/UFE1
EYC84_000527	24.3357	40.6315	56.9553	0	0	0	scaffold_006.g527.t1	PLP-dependent transferase
EYC84_000528	0	10.0346	10.0831	0	0	0	scaffold_006.g528.t1	---NA---
EYC84_000543	19.8212	27.5643	21.6683	0	0	0	scaffold_006.g543.t1	putative succinate-semialdehyde dehydrogenase
EYC84_000544	0	11.7179	0	0	0	0	scaffold_006.g544.t1	putative Pre-rRNA-processing protein ESF2
EYC84_000546	0	0	15.4514	0	0	0	scaffold_006.g546.t1	---NA---
EYC84_000552	0	0	11.9566	0	0	0	scaffold_006.g552.t1	---NA---
EYC84_000559	0	16.9519	0	0	0	0	scaffold_006.g559.t1	glutaminyl-tRNA synthetase
EYC84_000562	37.3646	25.2479	26.6799	0	0	0	scaffold_006.g562.t1	probable general amidase
EYC84_000563	19.9595	0	14.997	0	0	0	scaffold_006.g563.t1	PQ loop repeat protein
EYC84_000569	11.0711	12.4157	0	0	0	0	scaffold_006.g569.t1	Nucleotidylyl transferase
EYC84_000570	11.0733	11.7679	0	0	0	0	scaffold_006.g570.t1	DEAD-domain-containing protein
EYC84_000573	0	10.2514	0	0	0	0	scaffold_006.g573.t1	related to IQ calmodulin-binding motif protein
EYC84_000579	17.792	12.2884	11.6582	0	0	0	scaffold_006.g579.t1	Fip1-domain-containing protein
EYC84_000580	19.8018	0	0	0	0	0	scaffold_006.g580.t1	nucleoporin nup49 nsp49 protein
EYC84_000581	39.7591	0	22.4394	0	0	0	scaffold_006.g581.t1	TauD-domain-containing protein
EYC84_000596	0	12.9338	0	0	0	0	scaffold_006.g596.t1	putative Pre-rRNA-processing protein esf1
EYC84_000609	13.1932	0	14.4207	0	0	0	scaffold_006.g609.t1	CRAL/TRIO domain-containing protein
EYC84_000610	11.0538	13.3081	21.6622	0	0	0	scaffold_006.g610.t1	Molybdopterin binding protein
EYC84_000614	37.7255	19.2643	14.106	0	0	0	scaffold_006.g614.t1	NADP-dependent L-serine/L-allo-threonine dehydrogenase ydfG
EYC84_000618	0	22.3308	14.709	0	0	0	scaffold_006.g618.t1	ARM repeat-containing protein
EYC84_000623	13.1695	0	0	0	0	0	scaffold_006.g623.t1	RhoGEF domain-containing protein
EYC84_000632	10.9825	13.2324	15.3501	0	0	0	scaffold_006.g632.t1	cysteine proteinase
EYC84_000633	13.351	11.337	14.4266	0	0	0	scaffold_006.g633.t1	related to catecholamines up protein
EYC84_000647	0	0	15.1328	0	0	0	scaffold_006.g647.t1	putative multispanning membrane protein
EYC84_000650	15.4688	0	15.9163	0	0	0	scaffold_006.g650.t1	---NA---
EYC84_000653	33.1052	27.4258	17.9337	0	0	0	scaffold_006.g653.t1	related to ribosomal protein
EYC84_000654	10.9825	15.5722	0	0	0	0	scaffold_006.g654.t1	dienelactone hydrolase
EYC84_000657	15.3327	0	0	0	0	0	scaffold_006.g657.t1	related to coenzyme A transporter
EYC84_000666	10.9587	12.0038	11.6627	0	0	0	scaffold_006.g666.t1	related to PAN1-actin-cytoskeleton assembly protein
EYC84_000670	0	10.2397	0	0	0	0	scaffold_006.g670.t1	ATP-dependent RNA helicase DHX8
EYC84_000675	11.0711	0	0	0	0	0	scaffold_006.g675.t1	RNA exonuclease 4 protein
EYC84_000679	15.5596	11.6281	0	0	0	0	scaffold_006.g679.t1	MCM-domain-containing protein
EYC84_000689	0	14.9598	0	0	0	0	scaffold_008.g6.t1	GAT domain-containing protein
EYC84_000694	17.658	24.0369	13.0649	11.4437	0	0	scaffold_008.g11.t1	respiratory complex assembly rmp1 protein
EYC84_000698	24.2837	0	0	0	0	0	scaffold_008.g15.t1	kinase-like protein
EYC84_000701	0	10.7383	15.3579	0	0	0	scaffold_008.g18.t1	putative MAP kinase kinase (Pbs2)
EYC84_000706	0	15.0441	19.3446	0	0	0	scaffold_008.g23.t1	PAB-dependent poly(A)-specific ribonuclease subunit PAN3 protein
EYC84_000707	24.4675	15.1038	14.2845	0	0	0	scaffold_008.g24.t1	ubx domain protein
EYC84_000708	48.5568	93.817	50.3071	12.9143	0	0	scaffold_008.g25.t1	putative viral a-type inclusion protein repeat protein
EYC84_000711	24.3551	17.6109	55.7831	0	0	0	scaffold_008.g28.t1	glycoside hydrolase family 61 protein
EYC84_000712	0	18.7959	21.6904	0	0	0	scaffold_008.g29.t1	cytochrome P450 protein
EYC84_000716	0	0	11.2321	0	0	0	scaffold_008.g33.t1	CFEM domain-containing protein
EYC84_000719	0	0	14.6337	0	0	0	scaffold_008.g36.t1	related to N-acetyltransferase NAT13
EYC84_000726	0	0	11.2116	0	0	0	scaffold_008.g43.t1	phosphoglycerate mutase-like protein
EYC84_000727	17.6148	14.3701	14.1548	0	0	0	scaffold_008.g44.t1	DUF336-domain-containing protein
EYC84_000728	13.2602	24.521	17.5444	14.1052	0	0	scaffold_008.g45.t1	L-gulonolactone/D-arabinono-1,4-lactone oxidase
EYC84_000732	13.3078	0	18.6384	0	0	0	scaffold_008.g49.t1	fasciclin domain family protein
EYC84_000739	39.7181	33.6765	24.5993	0	0	0	scaffold_008.g56.t1	putative altered inheritance of mitochondria protein 13, mitochondrial
EYC84_000743	0	13.6271	26.903	0	0	0	scaffold_008.g60.t1	TRP-domain-containing protein
EYC84_000745	24.4243	10.6649	12.3482	0	0	0	scaffold_008.g62.t1	BRCA1 C Terminus domain-containing protein
EYC84_000748	15.4494	0	21.3355	0	0	0	scaffold_008.g65.t1	WH1-domain-containing protein
EYC84_000752	11.03	0	0	0	0	0	scaffold_008.g69.t1	tRNA-splicing endonuclease
EYC84_000753	15.3564	0	21.4325	0	0	0	scaffold_008.g70.t1	phospholipid-translocating P-type ATPase
EYC84_000755	44.3341	32.666	50.8078	0	0	0	scaffold_008.g72.t1	vacuolar ATP synthase subunit E
EYC84_000756	0	13.5468	29.661	0	0	0	scaffold_008.g73.t1	DUF803 domain-containing protein
EYC84_000776	24.1714	0	20.5848	0	0	0	scaffold_008.g93.t1	multidrug resistance-associated protein
EYC84_000777	0	10.5981	12.8495	0	0	0	scaffold_008.g94.t1	glutathione S-transferas-like protein
EYC84_000785	13.2624	15.5619	18.9466	10.1239	0	0	scaffold_008.g102.t1	oxysterol-binding protein-like protein
EYC84_000789	0	12.8827	17.2861	0	0	0	scaffold_008.g106.t1	putative Nicotinate-nucleotide pyrophosphorylase
EYC84_000796	17.7293	29.4204	12.6446	0	0	0	scaffold_008.g113.t1	putative Leukotriene A-4 hydrolase like protein
EYC84_000797	19.8688	0	26.1317	0	0	0	scaffold_008.g114.t1	M serotype protein
EYC84_000802	26.5161	22.5066	22.442	0	0	0	scaffold_008.g119.t1	related to methyltransferase
EYC84_000807	22.3237	12.4935	0	0	0	0	scaffold_008.g124.t1	P-loop containing nucleoside triphosphate hydrolase protein
EYC84_000816	33.2436	28.2347	30.2747	24.0017	0	0	scaffold_008.g133.t1	ornithine decarboxylase antizyme
EYC84_000821	17.7272	13.4906	20.1277	0	0	0	scaffold_008.g138.t1	capsule polysaccharide biosynthesis protein
EYC84_000824	50.895	49.6336	34.3091	0	0	0	scaffold_008.g141.t1	mitochondrial precursor protein-like protein import receptor tom70
EYC84_000827	24.3983	22.0917	15.1816	0	0	0	scaffold_008.g144.t1	probable DAP1 Damage response protein
EYC84_000831	33.1722	42.8726	38.2844	12.084	0	0	scaffold_008.g148.t1	Pkinase-domain-containing protein
EYC84_000833	39.8909	24.3749	12.5655	0	0	0	scaffold_008.g150.t1	tryptophanyl-tRNA synthetase
EYC84_000838	30.9852	21.576	27.1197	0	0	0	scaffold_008.g155.t1	cupin -type protein
EYC84_000843	10.9349	0	0	0	0	0	scaffold_008.g160.t1	MFS general substrate transporter
EYC84_000845	0	12.3046	10.2376	0	0	0	scaffold_008.g162.t1	membrane protein
EYC84_000846	31.0284	13.6932	17.7995	0	0	0	scaffold_008.g163.t1	related to acetate regulatory DNA binding protein FacB
EYC84_000848	0	0	10.8484	0	0	0	scaffold_008.g165.t1	Rgp1-domain-containing protein
EYC84_000854	17.792	19.8146	12.3726	0	0	0	scaffold_008.g171.t1	kh domain-containing protein
EYC84_000858	0	11.7931	0	0	0	0	scaffold_008.g175.t1	putative GrpE protein like protein, mitochondrial
EYC84_000862	15.538	12.0032	0	0	0	0	scaffold_008.g179.t1	mitochondrial carrier
EYC84_000863	0	10.2778	0	0	0	0	scaffold_008.g180.t1	phenylalanine-tRNA synthetase
EYC84_000865	0	0	12.9004	0	0	0	scaffold_008.g182.t1	putative acetyl-coenzyme A synthetase
EYC84_000866	22.0125	13.8698	28.6791	0	0	0	scaffold_008.g183.t1	putative acetyl-coenzyme A synthetase
EYC84_000868	0	0	12.2651	0	0	0	scaffold_008.g185.t1	ADAM family of metalloprotease-like protein ADM-B
EYC84_000869	19.8018	18.7249	12.4215	0	0	0	scaffold_008.g186.t1	RNA polymerase II subunit 3
EYC84_000871	11.0063	12.8655	12.2205	0	0	0	scaffold_008.g188.t1	probable transcriptional repressor rco-1
EYC84_000872	0	11.9994	0	0	0	0	scaffold_008.g189.t1	mitochondrion organization and biogenesis protein
EYC84_000875	17.6774	15.6387	14.0552	0	0	0	scaffold_008.g192.t1	TIP49-domain-containing protein
EYC84_000878	13.2408	15.4206	0	0	0	0	scaffold_008.g195.t1	release factor
EYC84_000881	15.471	23.658	22.0358	0	0	0	scaffold_008.g198.t1	related to MSP1 protein
EYC84_000886	0	17.8469	21.4957	0	0	0	scaffold_008.g203.t1	vesicular-fusion protein sec17
EYC84_000892	35.3786	0	19.3443	0	0	0	scaffold_008.g209.t1	related to GPI anchored protein
EYC84_000896	37.5527	34.484	21.4371	0	0	0	scaffold_008.g213.t1	putative glucokinase GLK1 protein
EYC84_000898	0	0	15.3094	0	0	0	scaffold_008.g215.t1	---NA---
EYC84_000900	11.0279	15.0462	17.0835	0	0	0	scaffold_008.g217.t1	heterokaryon incompatibility protein
EYC84_000901	10.9349	14.7616	29.4251	0	0	0	scaffold_008.g218.t1	ankyrin repeat protein
EYC84_000902	17.8374	0	13.0322	0	0	0	scaffold_008.g219.t1	---NA---
EYC84_000903	0	12.2835	0	0	0	0	scaffold_008.g220.t1	DNA-directed RNA polymerase III subunit rpc10
EYC84_000904	10.9349	0	0	0	0	0	scaffold_008.g221.t1	mediator of RNA polymerase II transcription subunit 31
EYC84_000907	13.2818	0	0	0	0	0	scaffold_008.g224.t1	3' exoribonuclease family protein
EYC84_000908	19.9098	16.9348	25.5515	0	0	0	scaffold_008.g225.t1	ferric reductase like transmembrane component
EYC84_000909	39.8023	38.3805	31.4771	0	0	0	scaffold_008.g226.t1	putative rab geranylgeranyl transferase escort protein
EYC84_000910	0	0	12.6163	0	0	0	scaffold_008.g227.t1	zinc finger protein
EYC84_000912	17.6148	16.1242	32.5433	0	0	0	scaffold_008.g229.t1	C2H2 and C2HC zinc finger
EYC84_000913	11.1186	0	14.8263	0	0	0	scaffold_008.g230.t1	---NA---
EYC84_000921	0	13.0146	11.5712	0	0	0	scaffold_008.g238.t1	---NA---
EYC84_000922	15.4948	28.2209	26.501	0	0	0	scaffold_008.g239.t1	UPF0041 domain protein
EYC84_000924	11.0711	12.4516	17.3288	0	0	0	scaffold_008.g241.t1	---NA---
EYC84_000925	42.0325	31.079	28.3234	0	0	0	scaffold_008.g242.t1	---NA---
EYC84_000926	37.4532	46.8515	39.6102	0	0	0	scaffold_008.g243.t1	peroxisomal matrix protein
EYC84_000940	0	13.5536	0	0	0	0	scaffold_008.g257.t1	dienelactone hydrolase family protein-like protein
EYC84_000945	24.2449	36.8308	13.8845	0	0	0	scaffold_008.g262.t1	amidophosphoribosyltransferase
EYC84_000950	22.2329	0	11.8367	0	0	0	scaffold_008.g267.t1	probable betaine aldehyde dehydrogenase
EYC84_000954	20.0027	14.019	10.3127	0	0	0	scaffold_008.g271.t1	cora-domain-containing protein
EYC84_000968	0	0	19.8134	0	0	0	scaffold_008.g285.t1	amidase family protein
EYC84_000970	15.5186	0	21.1872	0	0	0	scaffold_008.g287.t1	---NA---
EYC84_000988	0	11.0552	17.0086	0	0	0	scaffold_008.g305.t1	related to G1/S-specific cyclin pas1
EYC84_001000	33.2003	17.8715	52.9227	0	0	0	scaffold_008.g317.t1	phosphoinositide 3-kinase regulatory subunit 4
EYC84_001002	44.2044	40.1079	45.6938	0	0	0	scaffold_008.g319.t1	fumarate hydratase
EYC84_001005	11.1619	17.3243	12.7785	0	0	0	scaffold_008.g322.t1	Spc97 Spc98 family protein
EYC84_001008	0	14.5353	15.269	0	0	0	scaffold_008.g325.t1	WD40 repeat-like protein
EYC84_001012	39.7851	39.871	23.822	10.2004	0	0	scaffold_008.g329.t1	N-acetyl-gamma-glutamyl-phosphate reductase/acetylglutamate kinase
EYC84_001014	24.3075	0	21.7781	0	0	0	scaffold_008.g331.t1	vesicle-associated membrane protein 4
EYC84_001030	15.404	23.736	12.8961	0	0	0	scaffold_008.g347.t1	imidazole glycerol phosphate synthase hisHF
EYC84_001038	11.1403	10.4441	16.9861	0	0	0	scaffold_008.g355.t1	2-methylcitrate dehydratase
EYC84_001042	0	0	11.1223	0	0	0	scaffold_008.g359.t1	DUF1687-domain-containing protein
EYC84_001044	0	10.9945	15.742	0	0	0	scaffold_008.g361.t1	putative phospholipid-binding protein
EYC84_001046	24.3767	17.1344	12.0377	0	0	0	scaffold_008.g363.t1	related to lysophospholipase
EYC84_001056	39.8671	23.4216	19.9518	0	0	0	scaffold_008.g373.t1	ubiquitin-conjugating enzyme E2
EYC84_001059	10.9825	0	0	0	0	0	scaffold_008.g376.t1	cellobiose dehydrogenase
EYC84_001069	0	10.8069	10.1766	0	0	0	scaffold_008.g386.t1	NEK protein kinase
EYC84_001075	0	10.1612	43.5718	0	0	0	scaffold_008.g392.t1	sugar transporter
EYC84_001081	31.0046	24.4497	21.5201	0	0	0	scaffold_008.g398.t1	cysteine proteinase
EYC84_001082	24.3832	34.9	67.4323	0	0	0	scaffold_008.g399.t1	ARP23 complex 20 kDa subunit
EYC84_001084	0	0	11.3295	0	0	0	scaffold_008.g401.t1	acyl-CoA thioesteras-like protein II
EYC84_001085	0	16.4499	24.9364	0	0	0	scaffold_008.g402.t1	protein efr3
EYC84_001091	17.6104	0	22.917	0	0	0	scaffold_008.g408.t1	ArfGap-domain-containing protein
EYC84_001092	15.445	0	22.7766	0	0	0	scaffold_008.g409.t1	RmlC-like cupin
EYC84_001093	0	0	10.2883	0	0	0	scaffold_008.g410.t1	---NA---
EYC84_001106	13.284	0	0	0	0	0	scaffold_008.g423.t1	related to ribosomal protein s25
EYC84_001111	0	10.9365	14.2767	0	0	0	scaffold_008.g428.t1	related to Lactobacillus putative histidine protein kinase SppK
EYC84_001112	13.2818	20.4277	22.0687	0	0	0	scaffold_008.g429.t1	histone H1-binding protein
EYC84_001114	0	10.4698	0	0	0	0	scaffold_008.g431.t1	GTPase-activating protein gyp1
EYC84_001115	0	15.3666	15.1755	0	0	0	scaffold_008.g432.t1	related to heterogeneous nuclear ribonucleoprotein D0
EYC84_001122	19.8212	33.4588	26.9207	0	0	0	scaffold_008.g439.t1	proteasome subunit alpha type 6
EYC84_001123	13.3294	0	0	0	0	0	scaffold_008.g440.t1	proteasome subunit alpha type 6 protein
EYC84_001124	11.097	0	18.652	0	0	0	scaffold_008.g441.t1	hypothetical protein DID88_005527
EYC84_001133	0	17.7734	10.5457	0	0	0	scaffold_008.g450.t1	dimethyladenosine transferase
EYC84_001134	33.196	38.4936	20.2536	0	0	0	scaffold_008.g451.t1	putative Ribosome biogenesis protein tsr1 like protein
EYC84_001137	28.7053	40.8748	26.0711	0	0	0	scaffold_008.g454.t1	adenylosuccinate synthetase
EYC84_001156	13.2862	0	0	0	0	0	scaffold_008.g473.t1	pseudouridine synthase
EYC84_001175	19.9811	0	0	0	0	0	scaffold_008.g492.t1	PTH2-domain-containing protein
EYC84_001178	13.1932	0	19.3786	0	0	0	scaffold_008.g495.t1	ER to Golgi transport protein-like protein Yif1
EYC84_001179	0	11.7985	0	0	0	0	scaffold_008.g496.t1	signal recognition particle receptor subunit alpha
EYC84_001183	0	10.6069	0	0	0	0	scaffold_008.g500.t1	---NA---
EYC84_001184	17.6818	22.03	30.5588	0	0	0	scaffold_008.g501.t1	probable nitrogen regulatory protein areA
EYC84_001194	22.2373	0	0	0	0	0	scaffold_008.g511.t1	SSS family solute:Na+ symporter
EYC84_001196	22.2805	0	17.7246	0	0	0	scaffold_008.g513.t1	helicase protein
EYC84_001205	0	11.6288	0	0	0	0	scaffold_008.g522.t1	pentatricopeptide repeat domain-containing protein
EYC84_001214	19.7996	0	0	0	0	0	scaffold_008.g531.t1	U3 small nucleolar ribonucleoprotein IMP3
EYC84_001215	22.0298	25.3724	14.9279	0	0	0	scaffold_008.g532.t1	ribosomal protein S18
EYC84_001216	0	0	19.9206	0	0	0	scaffold_008.g533.t1	integral membrane protein
EYC84_001218	15.538	15.5268	0	0	0	0	scaffold_008.g535.t1	pre-mRNA-splicing factor prp1
EYC84_001222	0	10.0392	11.7393	0	0	0	scaffold_008.g539.t1	phospholipid metabolism enzyme regulator protein
EYC84_001230	20.0027	17.9022	10.0183	0	0	0	scaffold_008.g547.t1	putative 60s ribosomal protein
EYC84_001235	41.9699	29.7118	24.4941	0	0	0	scaffold_008.g552.t1	peptidyl-prolyl cis-trans isomerase
EYC84_001237	22.0363	13.6267	16.4968	0	0	0	scaffold_008.g554.t1	related to general negative regulator of transcription, subunit 3 (NOT3)
EYC84_001238	0	19.1635	10.8464	0	0	0	scaffold_008.g555.t1	WD40 repeat-like protein
EYC84_001240	17.6602	10.6429	0	0	0	0	scaffold_008.g557.t1	MRC1-like domain-containing protein
EYC84_001242	32.9409	32.8149	25.8144	0	0	0	scaffold_008.g559.t1	mitochondrial large ribosomal subunit protein
EYC84_001243	22.1703	19.9559	18.4595	10.751	0	0	scaffold_008.g560.t1	related to pre-mRNA splicing factor
EYC84_001246	33.103	38.7316	48.3056	0	0	0	scaffold_008.g563.t1	neutral trehalase
EYC84_001254	17.6818	13.5425	0	0	0	0	scaffold_008.g571.t1	RNA polymerase II transcription elongation factor Rtf1p
EYC84_001259	0	0	20.2642	0	0	0	scaffold_008.g576.t1	chitin synthase 1
EYC84_001260	17.658	0	0	0	0	0	scaffold_008.g577.t1	phosphotyrosine phosphatase protein
EYC84_001262	26.5205	16.166	18.4514	0	0	0	scaffold_008.g579.t1	SNARE docking complex subunit
EYC84_001270	11.0495	14.9996	18.0536	0	0	0	scaffold_008.g587.t1	CASC3 Barentsz domain-containing protein
EYC84_001278	10.9587	19.0727	0	0	0	0	scaffold_008.g595.t1	related to S.pombe Rnp24p, Nsr1p and human splicing factor
EYC84_001281	17.7466	43.176	29.8803	10.1283	0	0	scaffold_008.g598.t1	probable isocitrate dehydrogenase [NADP] precursor
EYC84_001288	22.0579	22.0309	10.603	0	0	0	scaffold_008.g605.t1	---NA---
EYC84_001290	15.5618	23.363	33.8422	0	0	0	scaffold_008.g607.t1	DUF1275 domain protein
EYC84_001291	0	14.99	21.5491	0	0	0	scaffold_008.g608.t1	---NA---
EYC84_001297	15.4234	0	0	0	0	0	scaffold_008.g614.t1	zinc finger protein
EYC84_001309	28.889	21.7406	11.0718	0	0	0	scaffold_008.g626.t1	glutamine synthetase-like protein
EYC84_001313	0	11.5866	10.8708	0	0	0	scaffold_008.g630.t1	---NA---
EYC84_001316	30.9226	47.4926	43.3159	0	11.5144	0	scaffold_008.g633.t1	DnaJ-domain-containing protein
EYC84_001321	15.4234	19.5771	13.1052	0	0	0	scaffold_008.g638.t1	periplasmic binding protein-like II
EYC84_001322	13.3726	12.2428	10.0447	0	0	0	scaffold_008.g639.t1	---NA---
EYC84_001334	10.9349	0	29.5577	0	0	0	scaffold_008.g651.t1	related to nitrate assimilation regulatory protein nirA
EYC84_001340	17.6148	26.68	18.4595	0	0	0	scaffold_008.g657.t1	ATPase get3
EYC84_001345	44.3103	33.4717	39.6992	0	0	0	scaffold_008.g662.t1	multiprotein-bridging factor 1
EYC84_001347	0	0	24.5344	0	0	0	scaffold_008.g664.t1	---NA---
EYC84_001354	22.0557	25.7415	19.9108	0	0	0	scaffold_008.g671.t1	SPT16-domain-containing protein
EYC84_001355	28.8177	37.1869	18.123	0	0	0	scaffold_008.g672.t1	putative FACT complex subunit SPT16 protein
EYC84_001357	0	19.1721	12.8433	0	0	0	scaffold_008.g674.t1	cysteine proteinase
EYC84_001360	0	10.3117	13.0508	0	0	0	scaffold_008.g677.t1	kinesin-domain-containing protein
EYC84_001361	86.2435	138.911	62.1536	21.7751	15.8218	0	scaffold_008.g678.t1	related to hexamer-binding protein HEXBP
EYC84_001362	61.8646	68.1667	33.4891	0	0	0	scaffold_008.g679.t1	---NA---
EYC84_001368	0	0	18.7315	0	0	0	scaffold_008.g685.t1	related to cell division protein CDC50
EYC84_001379	17.632	13.3415	15.7986	0	0	0	scaffold_005.g9.t1	glycosyltransferase family 4 protein
EYC84_001381	35.383	34.9031	27.451	15.8468	0	0	scaffold_005.g11.t1	ribonucleotide reductase large subunit
EYC84_001382	88.2142	63.6331	42.2431	13.4082	0	0	scaffold_005.g12.t1	CFEM domain-containing protein
EYC84_001385	11.0733	12.6478	14.4148	0	0	0	scaffold_005.g15.t1	kinase-like protein
EYC84_001387	15.3327	0	14.9973	0	0	0	scaffold_005.g17.t1	glycosyltransferase family 31 protein
EYC84_001396	48.5978	0	0	10.7576	0	0	scaffold_005.g26.t1	methyltransferase protein
EYC84_001405	0	0	25.4518	0	0	0	scaffold_005.g35.t1	hypothetical protein DID88_001058
EYC84_001408	35.45	100.542	53.9273	0	0	0	scaffold_005.g38.t1	aldo/keto reductase
EYC84_001413	0	0	10.3548	0	0	0	scaffold_005.g43.t1	maltose permease MAL61
EYC84_001414	15.4018	32.2224	43.9355	0	10.3686	0	scaffold_005.g44.t1	DAO-domain-containing protein
EYC84_001428	19.7996	25.2489	42.1675	0	0	0	scaffold_005.g58.t1	heavy-metal-associated domain-containing protein
EYC84_001430	19.9098	21.3014	25.5472	0	0	0	scaffold_005.g60.t1	phosphatase 2c protein
EYC84_001451	0	0	16.1176	0	0	0	scaffold_005.g81.t1	glycoside hydrolase family 35 protein
EYC84_001455	0	0	10.4464	0	0	0	scaffold_005.g85.t1	WD repeat-containing protein pop3
EYC84_001457	28.9128	26.1067	34.2582	0	0	0	scaffold_005.g87.t1	predicted protein
EYC84_001460	26.6091	27.1397	12.4416	0	0	0	scaffold_005.g90.t1	ribosomal l32p family protein
EYC84_001461	0	10.6687	0	0	0	0	scaffold_005.g91.t1	WD40 repeat-like protein
EYC84_001468	26.5399	15.3177	0	0	0	0	scaffold_005.g98.t1	phosphoglycerate mutase family protein
EYC84_001470	0	13.2074	10.6777	0	0	0	scaffold_005.g100.t1	pentatricopeptide repeat protein
EYC84_001473	13.2581	24.4164	27.9145	0	0	0	scaffold_005.g103.t1	R3H domain-containing protein
EYC84_001474	93.0746	87.9117	46.7183	15.5605	0	0	scaffold_005.g104.t1	Mov34-domain-containing protein
EYC84_001475	13.1457	15.1007	0	0	0	0	scaffold_005.g105.t1	U3 small nucleolar RNA-associated protein 25
EYC84_001476	0	16.3073	14.8732	0	0	0	scaffold_005.g106.t1	50S ribosomal protein L17
EYC84_001477	26.4989	38.4663	26.1701	0	0	0	scaffold_005.g107.t1	Ureidoglycolate hydrolase protein
EYC84_001481	11.0754	10.9495	12.9186	0	0	0	scaffold_005.g111.t1	adaptor complexes medium subunit family protein
EYC84_001488	0	11.6335	11.9954	0	0	0	scaffold_005.g118.t1	aldehyde dehydrogenase
EYC84_001489	28.7528	38.0632	20.1197	0	0	0	scaffold_005.g119.t1	related to RSM24-mitochondrial ribosomal protein, small subunit
EYC84_001494	0	20.2161	11.9996	0	0	0	scaffold_005.g124.t1	transcription elongation factor Spt6
EYC84_001496	0	0	15.9101	0	0	0	scaffold_005.g126.t1	oxysterol-binding protein
EYC84_001497	11.1186	11.8914	0	0	0	0	scaffold_005.g127.t1	IFRD domain-containing protein
EYC84_001505	19.9552	11.5073	15.125	0	0	0	scaffold_005.g135.t1	adaptor complexes medium subunit family protein
EYC84_001506	41.9742	20.6235	18.6709	0	0	0	scaffold_005.g136.t1	chromatin remodelling complex ATPase chain ISW1
EYC84_001508	11.0041	0	27.7797	0	0	0	scaffold_005.g138.t1	tat pathway signal sequence
EYC84_001509	13.1219	0	14.2888	0	0	0	scaffold_005.g139.t1	High-affinity methionine permease
EYC84_001517	0	0	16.1193	0	0	0	scaffold_005.g147.t1	peptide-N4-(N-acetyl-beta-glucosaminyl)asparagine amidase A protein
EYC84_001523	13.2386	0	11.7963	0	0	0	scaffold_005.g153.t1	probable protein kinase family protein
EYC84_001525	39.7115	45.2907	35.6404	0	0	0	scaffold_005.g155.t1	Glutathione reductase
EYC84_001529	73.3787	56.6964	31.468	0	0	0	scaffold_005.g159.t1	leucyl-tRNA synthetase
EYC84_001539	17.6364	11.6343	18.7113	0	0	0	scaffold_005.g169.t1	fructose-26-bisphosphatase protein
EYC84_001547	33.2176	25.1489	13.9109	0	0	0	scaffold_005.g177.t1	ribose-phosphate pyrophosphokinase 3
EYC84_001548	15.3564	31.212	14.4308	0	0	0	scaffold_005.g178.t1	related to TOM1 protein
EYC84_001552	15.3327	20.0153	16.9838	0	0	0	scaffold_005.g182.t1	related to TSC13-required for elongation of VLCFA moiety of sphingolipids
EYC84_001553	0	0	38.7424	0	0	0	scaffold_005.g183.t1	fatty acid oxygenase
EYC84_001559	22.1205	0	12.194	0	0	0	scaffold_005.g189.t1	putative wd domain containing protein
EYC84_001565	13.3294	10.5956	15.6788	0	0	0	scaffold_005.g195.t1	hydroxymethylglutaryl-CoA lyase
EYC84_001568	28.5973	21.3933	16.2515	0	0	0	scaffold_005.g198.t1	acetylornithine and succinylornithine aminotransferase
EYC84_001573	15.4516	10.5326	10.5685	0	0	0	scaffold_005.g203.t1	geranylgeranyl transferas-like protein type II alpha subunit
EYC84_001577	15.404	0	22.9756	0	0	0	scaffold_005.g207.t1	Protein BTN1
EYC84_001578	0	0	13.688	0	0	0	scaffold_005.g208.t1	phosphoesterase-domain-containing protein
EYC84_001579	13.2602	0	0	0	0	0	scaffold_005.g209.t1	MFS general substrate transporter
EYC84_001580	19.7974	0	0	0	0	0	scaffold_005.g210.t1	probable candidate tumor suppressor DPH2L1
EYC84_001587	42.0585	48.8562	30.9842	10.196	0	0	scaffold_005.g217.t1	methionine aminopeptidase 2-like protein
EYC84_001588	0	0	14.0979	0	0	0	scaffold_005.g218.t1	sphingolipid delta4-desaturase
EYC84_001590	13.1911	14.6783	17.9439	0	0	0	scaffold_005.g220.t1	UBX domain protein
EYC84_001592	0	12.8597	17.5379	0	0	0	scaffold_005.g222.t1	tethering factor for nuclear proteasome sts1
EYC84_001594	30.8037	38.3915	20.0672	0	0	0	scaffold_005.g224.t1	putative aconitate hydratase 2
EYC84_001597	22.2567	29.5678	16.6124	0	0	0	scaffold_005.g227.t1	ornithine carbamoyltransferase
EYC84_001599	13.2602	18.7582	21.4957	0	0	0	scaffold_005.g229.t1	YCII-related domain protein
EYC84_001601	0	0	10.7975	0	0	0	scaffold_005.g231.t1	related to UPF0662 protein C30C2.08
EYC84_001603	48.559	33.9763	18.2973	0	0	0	scaffold_005.g233.t1	methionyl-tRNA synthetase
EYC84_001606	28.6448	15.0808	0	0	0	0	scaffold_005.g236.t1	GTP-binding protein-like protein GUF1
EYC84_001607	0	0	10.2193	0	0	0	scaffold_005.g237.t1	mitotic spindle checkpoint component mad2
EYC84_001618	0	11.1686	13.2085	0	0	0	scaffold_005.g248.t1	SNF7 family protein
EYC84_001619	13.3726	14.4386	0	0	0	0	scaffold_005.g249.t1	hypothetical protein DID88_000847
EYC84_001623	0	0	13.4297	0	0	0	scaffold_005.g253.t1	NAD(P)-binding protein
EYC84_001624	15.3802	20.5394	16.2938	0	0	0	scaffold_005.g254.t1	acyl-CoA N-acyltransferase
EYC84_001627	0	10.6392	0	0	0	0	scaffold_005.g257.t1	DUF1761-domain-containing protein
EYC84_001635	15.4472	36.5138	39.9207	0	0	0	scaffold_005.g265.t1	Calponin-homology, CH-domain-containing protein
EYC84_001644	75.5397	50.5129	47.5889	13.8977	0	0	scaffold_005.g274.t1	putative pre-mRNA splicing factor (Srp1)
EYC84_001648	17.7682	14.5497	14.5832	0	0	0	scaffold_005.g278.t1	related to USO1 Intracellular protein transport protein
EYC84_001649	28.5929	44.9485	48.9972	0	11.2333	0	scaffold_005.g279.t1	oligosaccharyl transferase
EYC84_001651	0	15.4265	0	0	0	0	scaffold_005.g281.t1	ABC1 family protein
EYC84_001652	26.4773	39.7389	42.5392	0	0	0	scaffold_005.g282.t1	solute carrier family 25 member 33
EYC84_001653	13.3078	13.9405	11.4392	0	0	0	scaffold_005.g283.t1	---NA---
EYC84_001656	24.1519	41.5987	42.8356	0	0	0	scaffold_005.g286.t1	---NA---
EYC84_001659	0	0	12.9674	0	0	0	scaffold_005.g289.t1	---NA---
EYC84_001670	0	23.2763	46.2431	0	0	0	scaffold_005.g300.t1	Acetyl-CoA synthetase-like protein
EYC84_001671	13.2127	0	11.5768	0	0	0	scaffold_005.g301.t1	related to DNA-damage repair protein DRT111 precursor
EYC84_001683	0	0	12.1553	0	0	0	scaffold_005.g313.t1	---NA---
EYC84_001686	30.875	11.2063	0	0	0	0	scaffold_005.g316.t1	ER membrane protein-like protein
EYC84_001687	46.3654	45.6561	22.3443	0	0	0	scaffold_005.g317.t1	MYG1 protein
EYC84_001688	30.8728	22.5744	18.6279	0	0	0	scaffold_005.g318.t1	Endosulfine-domain-containing protein
EYC84_001690	13.2386	18.8793	0	0	0	0	scaffold_005.g320.t1	probable DUF431 domain protein
EYC84_001691	28.8652	24.2765	48.6763	0	0	0	scaffold_005.g321.t1	serine carboxypeptidase
EYC84_001692	17.684	21.6774	19.9089	0	0	0	scaffold_005.g322.t1	WD40 repeat-like protein
EYC84_001696	11.03	14.8306	0	0	0	0	scaffold_005.g326.t1	putative Branched-chain-amino-acid aminotransferase
EYC84_001699	11.0279	37.6318	27.1891	0	0	0	scaffold_005.g329.t1	probable glutaredoxin
EYC84_001702	11.0949	12.7914	0	0	0	0	scaffold_005.g332.t1	nagb/rpia/CoA transferase-like protein
EYC84_001704	11.0517	12.085	16.5981	0	0	0	scaffold_005.g334.t1	related to nuclear envelope protein NEM1
EYC84_001705	37.5267	33.563	19.1476	0	0	0	scaffold_005.g335.t1	beta and beta-prime subunits of DNA dependent RNA-polymerase
EYC84_001706	11.0733	0	0	0	0	0	scaffold_005.g336.t1	neutral/alkaline nonlysosomal ceramidase-like protein
EYC84_001710	13.351	17.9072	17.7653	0	0	0	scaffold_005.g340.t1	carbohydrate-Binding Module family 48 protein
EYC84_001715	44.1503	23.3653	14.8445	0	0	0	scaffold_005.g345.t1	ubiquitin carboxyl-terminal hydrolase-like protein
EYC84_001716	20.0006	18.0995	20.0027	0	0	0	scaffold_005.g346.t1	FeS cluster assembly scaffold IscU
EYC84_001717	44.2498	56.7926	25.6727	11.0918	0	0	scaffold_005.g347.t1	ATP-dependent RNA helicase DBP3
EYC84_001718	15.404	0	0	0	0	0	scaffold_005.g348.t1	rft domain-containing protein
EYC84_001722	15.5142	0	0	0	0	0	scaffold_005.g352.t1	ubiquitin fusion degradation protein
EYC84_001724	28.6383	14.943	11.4898	0	0	0	scaffold_005.g354.t1	TIP49-domain-containing protein
EYC84_001727	15.4256	30.7185	13.9474	0	0	0	scaffold_005.g357.t1	brix domain-containing protein 2
EYC84_001731	48.7816	35.1027	21.1263	0	0	0	scaffold_005.g361.t1	NOL1/NOP2/sun family putative RNA met
EYC84_001732	37.6175	60.0617	49.9432	0	0	0	scaffold_005.g362.t1	ubiquitin supergroup protein
EYC84_001734	72.9313	59.9346	46.3565	0	11.3912	0	scaffold_005.g364.t1	putative heat shock protein 60
EYC84_001748	0	14.4857	22.4212	0	0	0	scaffold_005.g378.t1	putative NAD/NADP-dependent indole-3-acetaldehyde reductase
EYC84_001754	0	10.1098	11.7944	0	0	0	scaffold_005.g384.t1	hypothetical protein sscle_01g003870
EYC84_001761	13.2581	0	0	0	0	0	scaffold_005.g391.t1	heat shock transcription factor (hsf)
EYC84_001764	24.4199	21.5725	0	0	0	0	scaffold_005.g394.t1	predicted protein
EYC84_001765	35.3138	27.3305	27.3796	11.5202	0	0	scaffold_005.g395.t1	histone H2A.Z
EYC84_001770	0	0	17.1119	0	0	0	scaffold_005.g400.t1	predicted protein
EYC84_001779	0	0	12.342	0	0	0	scaffold_005.g409.t1	Concanavalin A-like lectin glucanases superfamily protein
EYC84_001782	17.7726	19.0487	13.219	0	0	0	scaffold_005.g412.t1	WD40 repeat-like protein
EYC84_001784	19.9574	21.1948	11.5996	0	0	0	scaffold_005.g414.t1	inorganic phosphate transporter
EYC84_001792	0	0	15.5534	0	0	0	scaffold_005.g422.t1	DUF803-domain-containing protein
EYC84_001795	20.046	13.4449	13.3043	0	0	0	scaffold_005.g425.t1	putative Reticulon-like protein 1
EYC84_001798	0	10.3254	19.7404	0	0	0	scaffold_005.g428.t1	NAD(P)-binding protein
EYC84_001805	0	0	11.7637	0	0	0	scaffold_005.g435.t1	related to Lactobacillus putative histidine protein kinase SppK
EYC84_001808	13.3726	12.8905	13.8017	0	0	0	scaffold_005.g438.t1	glutamine repeat -1 protein
EYC84_001811	15.4018	18.0135	14.5301	0	0	0	scaffold_005.g441.t1	related to vesicular transport-associated repeat protein Tb-291
EYC84_001813	0	0	10.1401	0	0	0	scaffold_005.g443.t1	DnaJ domain-containing protein
EYC84_001815	26.5918	19.22	10.8099	0	0	0	scaffold_005.g445.t1	putative pro-apoptotic serine protease
EYC84_001817	0	0	20.073	0	0	0	scaffold_005.g447.t1	related to Rab6 GTPase activating protein, GAPCenA
EYC84_001818	11.0041	26.5498	19.316	0	0	0	scaffold_005.g448.t1	DNA topoisomerase 2
EYC84_001820	15.471	12.4935	0	0	0	0	scaffold_005.g450.t1	TPR-like protein
EYC84_001822	17.792	0	0	0	0	0	scaffold_005.g452.t1	glutathione S-transferase domain-containing protein
EYC84_001824	0	10.3388	13.8744	0	0	0	scaffold_005.g454.t1	---NA---
EYC84_001825	31.1214	23.1162	27.051	0	0	0	scaffold_005.g455.t1	calcium-binding protein NCS-1
EYC84_001826	26.5248	26.6132	25.4941	0	0	0	scaffold_005.g456.t1	survival factor 1
EYC84_001832	17.7466	0	0	0	0	0	scaffold_005.g462.t1	---NA---
EYC84_001833	11.0711	19.325	14.7129	0	0	0	scaffold_005.g463.t1	RCC1/BLIP-II protein
EYC84_001836	11.1619	0	0	0	0	0	scaffold_005.g466.t1	KH domain-containing protein
EYC84_001845	24.1519	17.4138	19.9392	0	0	0	scaffold_005.g475.t1	mitochondria fission 1 protein
EYC84_001846	15.5142	15.2464	16.0583	0	0	0	scaffold_005.g476.t1	mitochondrial fission 1 protein
EYC84_001847	0	0	10.6575	0	0	0	scaffold_005.g477.t1	kinetochore protein spc24
EYC84_001855	28.8177	22.1792	48.933	0	10.1194	0	scaffold_005.g485.t1	endocytosis and cytoskeletal organization protein
EYC84_001859	11.0257	11.0418	27.4428	0	0	0	scaffold_005.g489.t1	Autophagy-related protein
EYC84_001872	0	18.3944	12.5857	0	0	0	scaffold_005.g502.t1	---NA---
EYC84_001873	35.1582	41.3498	46.191	0	0	0	scaffold_005.g503.t1	3-isopropylmalate dehydratase
EYC84_001878	0	10.884	0	0	0	0	scaffold_005.g508.t1	GATA factor AREB gamma
EYC84_001879	11.0279	21.9822	11.453	0	0	0	scaffold_005.g509.t1	eukaryotic type KH-domain (KH-domain type I)
EYC84_001882	0	0	40.4872	0	0	0	scaffold_005.g512.t1	MFS general substrate transporter
EYC84_001886	0	0	10.605	0	0	0	scaffold_005.g516.t1	---NA---
EYC84_001890	11.0063	19.7779	12.7645	0	0	0	scaffold_005.g520.t1	54S ribosomal protein L4, mitochondrial
EYC84_001894	13.2386	0	0	0	0	0	scaffold_005.g524.t1	---NA---
EYC84_001895	28.8458	21.0559	32.6769	0	0	0	scaffold_005.g525.t1	related to regulatory protein amdA
EYC84_001898	35.3376	46.2091	34.853	0	10.1673	0	scaffold_005.g528.t1	methylenetetrahydrofolate reductase 1
EYC84_001899	0	11.8935	12.3241	0	0	0	scaffold_005.g529.t1	probable spindle pole body component 97
EYC84_001900	37.6175	24.6489	27.5406	0	0	0	scaffold_005.g530.t1	20S proteasome alpha subunit E
EYC84_001906	0	0	12.8215	0	0	0	scaffold_005.g536.t1	---NA---
EYC84_001909	0	11.5156	0	0	0	0	scaffold_005.g539.t1	RecF/RecN/SMC N terminal domain-containing protein
EYC84_001913	0	0	13.6271	0	0	0	scaffold_005.g543.t1	related to C6 finger domain protein
EYC84_001914	33.2154	12.5559	18.2706	0	0	0	scaffold_005.g544.t1	related to cell division control protein CDC36
EYC84_001925	11.1186	15.8414	0	0	0	0	scaffold_005.g555.t1	related to heat shock protein MDJ1
EYC84_001929	10.9803	12.2891	15.8212	0	0	0	scaffold_005.g559.t1	putative vacuolar protein-sorting protein bro1 protein
EYC84_001930	0	12.0598	11.7152	0	0	0	scaffold_005.g560.t1	ATP-dependent protease La
EYC84_001940	0	12.0594	0	0	0	0	scaffold_005.g570.t1	thiazole biosynthetic enzyme
EYC84_001949	22.0839	0	0	0	0	0	scaffold_005.g579.t1	related to alpha/beta hydrolase
EYC84_001950	13.2127	0	0	0	0	0	scaffold_005.g580.t1	Spo7-domain-containing protein
EYC84_001958	0	0	15.5915	0	0	0	scaffold_005.g588.t1	predicted protein
EYC84_001960	64.0472	71.199	34.5765	0	0	0	scaffold_005.g590.t1	CTP synthase
EYC84_001967	0	0	18.0318	0	0	0	scaffold_005.g597.t1	putative cytochrome c peroxidase
EYC84_001972	19.8234	41.6426	28.242	0	0	0	scaffold_005.g602.t1	ferredoxin reductase-like protein
EYC84_001974	15.4256	24.3784	18.6117	0	0	0	scaffold_005.g604.t1	UCH-domain-containing protein
EYC84_001975	0	12.477	0	0	0	0	scaffold_005.g605.t1	related to RNA helicase, mitochondrial
EYC84_001979	13.3078	17.3387	0	0	0	0	scaffold_005.g609.t1	putative Nucleolar complex-associated protein 3
EYC84_001980	24.1281	19.8169	0	0	0	0	scaffold_005.g610.t1	60S ribosome subunit biogenesis protein Nip7
EYC84_001982	0	11.1997	0	0	0	0	scaffold_005.g612.t1	putative denitrification regulatory protein nirq protein
EYC84_001983	46.1795	72.5861	34.6987	0	0	0	scaffold_005.g613.t1	ClpS-like protein
EYC84_001985	0	20.5181	14.5624	0	0	0	scaffold_005.g615.t1	putative UPF0674 endoplasmic reticulum membrane protein
EYC84_001989	46.3849	40.1233	56.2087	0	0	0	scaffold_005.g619.t1	---NA---
EYC84_001994	0	0	12.3257	0	0	0	scaffold_005.g624.t1	nucleoside transporter
EYC84_001998	20.0913	15.4392	11.3578	0	0	0	scaffold_005.g628.t1	mitochondrial distribution and morphology protein 34
EYC84_002001	0	0	12.1817	0	0	0	scaffold_005.g631.t1	NAD(P)-binding protein
EYC84_002012	0	0	13.032	0	0	0	scaffold_005.g642.t1	hypothetical protein BCIN_07g05350
EYC84_002013	0	0	11.234	0	0	0	scaffold_005.g643.t1	---NA---
EYC84_002019	0	0	11.3457	0	0	0	scaffold_005.g649.t1	glycoside hydrolase subgroup catalytic core protein
EYC84_002024	0	14.226	10.9193	0	0	0	scaffold_005.g654.t1	histone acetyltransferase type B
EYC84_002031	22.1205	39.5568	19.4033	12.1495	0	0	scaffold_005.g661.t1	---NA---
EYC84_002043	0	12.6985	13.2796	0	0	0	scaffold_005.g673.t1	---NA---
EYC84_002047	17.6558	0	0	0	0	0	scaffold_005.g677.t1	HCP-like protein
EYC84_002048	22.1443	18.6047	11.5709	0	0	0	scaffold_005.g678.t1	sporulation protein
EYC84_002051	0	18.8094	0	0	0	0	scaffold_005.g681.t1	putative atp-dependent rna helicase dbp9 protein
EYC84_002053	19.9833	18.5025	0	0	0	0	scaffold_005.g683.t1	putative Chromosome segregation protein sudA
EYC84_002054	35.2252	21.022	10.9255	0	0	0	scaffold_005.g684.t1	RIO1 family protein
EYC84_002057	11.0949	0	0	0	0	0	scaffold_005.g687.t1	predicted protein
EYC84_002062	52.9674	48.4611	23.0121	0	0	0	scaffold_005.g692.t1	arginyl-tRNA synthetase
EYC84_002084	0	0	0	10.4625	0	0	scaffold_005.g714.t1	bola-like protein
EYC84_002086	17.7056	0	23.1802	0	0	0	scaffold_005.g716.t1	GDSL Lipase/Acylhydrolase family protein
EYC84_002097	19.7304	0	15.2283	0	0	0	scaffold_005.g727.t1	APG17-domain-containing protein
EYC84_002106	35.4284	0	13.7854	0	0	0	scaffold_005.g736.t1	WD40 repeat-like protein
EYC84_002110	0	15.1545	0	0	0	0	scaffold_005.g740.t1	inosine-uridine preferring nucleoside hydrolase
EYC84_002111	0	20.9149	0	0	0	0	scaffold_005.g741.t1	putative acetyl-CoA carboxylase
EYC84_002112	28.6924	41.2985	12.5918	0	0	0	scaffold_005.g742.t1	putative acetyl-CoA carboxylase
EYC84_002115	26.6545	11.0475	13.8952	0	0	0	scaffold_005.g745.t1	related to nuclear distribution protein RO11
EYC84_002126	28.755	25.2106	23.3163	0	0	0	scaffold_005.g756.t1	related to Similarity to mucins, glucan 1,4-alpha-glucosidase and exo-alpha-sialidase
EYC84_002139	0	14.0278	23.2841	0	0	0	scaffold_007.g4.t1	general substrate transporter
EYC84_002140	0	12.6529	16.2007	0	0	0	scaffold_007.g5.t1	probable quinate 5-dehydrogenase QA-3
EYC84_002141	13.3056	10.1591	0	0	0	0	scaffold_007.g6.t1	inositol monophosphatase
EYC84_002142	31.0046	19.9271	0	0	0	0	scaffold_007.g7.t1	phosphoribosyl pyrophosphokinase
EYC84_002147	26.6134	18.6389	0	0	0	0	scaffold_007.g12.t1	rRNA processing protein-like protein Bystin
EYC84_002150	13.3726	0	0	0	0	0	scaffold_007.g15.t1	37S ribosomal Rsm22 protein
EYC84_002153	13.2148	12.1442	18.8775	0	0	0	scaffold_007.g18.t1	general substrate transporter
EYC84_002155	11.0538	0	10.2945	0	0	0	scaffold_007.g20.t1	monooxygenase flavin-binding family protein-like protein
EYC84_002168	19.752	26.637	39.9392	0	0	0	scaffold_007.g33.t1	GroES-like protein
EYC84_002174	0	0	21.8107	0	0	0	scaffold_007.g39.t1	putative trichothecene 3-o-acetyltransferase protein
EYC84_002175	13.1457	16.2661	38.3768	0	0	0	scaffold_007.g40.t1	predicted protein
EYC84_002176	0	0	20.1259	0	0	0	scaffold_007.g41.t1	predicted protein
EYC84_002186	17.658	13.1199	12.8456	0	0	0	scaffold_007.g51.t1	Spc7 kinetochore protein
EYC84_002192	0	0	12.4521	0	0	0	scaffold_007.g57.t1	ABC transporter-like protein
EYC84_002194	19.845	0	26.1499	0	0	0	scaffold_007.g59.t1	tripeptidyl-peptidase 1 precursor
EYC84_002203	88.6011	87.742	41.2397	0	10.738	0	scaffold_007.g68.t1	putative ribosome-associated complex subunit SSZ1
EYC84_002210	0	0	11.9566	0	0	0	scaffold_007.g75.t1	S-adenosyl-L-methionine-dependent methyltransferase
EYC84_002213	33.222	0	0	0	0	0	scaffold_007.g78.t1	OPT oligopeptide transporter
EYC84_002226	0	11.5921	0	0	0	0	scaffold_007.g91.t1	putative Phosducin-like protein 2
EYC84_002230	42.0109	14.7637	26.9191	0	0	0	scaffold_007.g95.t1	vacuolar protein sorting-associated protein vps17
EYC84_002234	28.6189	33.0286	16.4789	10.327	0	0	scaffold_007.g99.t1	aspartyl-tRNA synthetase
EYC84_002236	13.1219	11.2506	23.3209	0	0	0	scaffold_007.g101.t1	putative wd repeat domain-containing protein mip1 protein
EYC84_002237	0	0	11.421	0	0	0	scaffold_007.g102.t1	putative kelch domain-containing protein
EYC84_002238	0	0	15.5189	0	0	0	scaffold_007.g103.t1	Kelch motif
EYC84_002246	13.1932	0	0	0	0	0	scaffold_007.g111.t1	related to POP7 Nuclear RNase P subunit
EYC84_002252	17.859	11.8886	0	0	0	0	scaffold_007.g117.t1	dihydrofolate reductase protein
EYC84_002253	32.9669	30.9534	39.7706	11.4503	0	0	scaffold_007.g118.t1	26S proteasome non-ATPase regulatory subunit 12
EYC84_002254	15.4494	0	191.523	0	0	0	scaffold_007.g119.t1	Aromatic prenyltransferase protein
EYC84_002259	0	15.4083	12.2507	0	0	0	scaffold_007.g124.t1	putative tho complex subunit 2 protein
EYC84_002261	26.3389	39.4818	29.29	0	0	0	scaffold_007.g126.t1	homoserine o-acetyltransferase
EYC84_002266	22.1011	22.134	14.5161	0	0	0	scaffold_007.g131.t1	mitochondrial ferrochelatase-like protein
EYC84_002269	21.9866	36.2271	20.1666	0	0	0	scaffold_007.g134.t1	hypothetical protein DID88_002641
EYC84_002274	0	0	15.6628	0	0	0	scaffold_007.g139.t1	DUF500-domain-containing protein
EYC84_002305	13.2365	27.9879	0	0	0	0	scaffold_007.g170.t1	related to tyrosine--trna ligase precursor, mitochondrial (cyt-18)
EYC84_002310	0	19.1693	11.4412	0	0	0	scaffold_007.g175.t1	succinic semialdehyde dehydrogenase
EYC84_002314	0	0	95.8567	0	0	0	scaffold_007.g179.t1	carbohydrate-binding module family 35 protein
EYC84_002316	0	0	55.6917	0	0	0	scaffold_007.g181.t1	glycoside hydrolase family 79 protein
EYC84_002322	15.5186	0	0	0	0	0	scaffold_007.g187.t1	putative cytochrome c oxidase subunit vib protein
EYC84_002328	17.7942	14.6159	31.798	0	0	0	scaffold_007.g193.t1	membrane-associating domain-containing protein
EYC84_002335	17.6623	19.0637	27.6576	0	0	0	scaffold_007.g200.t1	phosphatidylinositol-glycan biosynthesis class S protein
EYC84_002340	0	0	10.678	0	0	0	scaffold_007.g205.t1	hypothetical protein BcDW1_7172
EYC84_002341	0	11.7406	18.7214	0	0	0	scaffold_007.g206.t1	related to hydroxyproline-rich glycoprotein precursor
EYC84_002342	22.1487	30.1208	12.4518	0	0	0	scaffold_007.g207.t1	ribosomal protein S8
EYC84_002346	0	21.7467	0	0	0	0	scaffold_007.g211.t1	DUF757 domain-containing protein
EYC84_002349	13.2862	12.3789	73.0709	0	0	0	scaffold_007.g214.t1	hypothetical protein DID88_009145
EYC84_002354	0	0	20.5643	0	0	0	scaffold_007.g219.t1	putative ADP-ribosylation factor GTPase-activating protein GCS1
EYC84_002359	28.6599	31.3405	20.8832	0	0	0	scaffold_007.g224.t1	Annexin
EYC84_002364	0	13.3147	11.5428	0	0	0	scaffold_007.g229.t1	sco1 protein
EYC84_002365	22.0298	14.7569	28.1898	0	0	0	scaffold_007.g230.t1	reticulocyte-binding 2 a protein
EYC84_002366	0	0	11.5588	0	0	0	scaffold_007.g231.t1	---NA---
EYC84_002373	15.5164	16.9122	15.3156	0	0	0	scaffold_007.g238.t1	predicted protein
EYC84_002378	0	0	13.3346	0	0	0	scaffold_007.g243.t1	Ribonucleotide reductase inhibitor protein
EYC84_002381	15.5142	15.7137	0	0	0	0	scaffold_007.g246.t1	sn-1,2-diacylglycerol cholinephosphotransferas-like protein
EYC84_002385	13.2602	17.5191	26.8076	0	0	0	scaffold_007.g250.t1	amino acid transporter
EYC84_002389	17.8158	0	0	0	0	0	scaffold_007.g254.t1	serine/threonine-protein phosphatase-like protein PP-Z
EYC84_002399	0	18.9303	0	0	0	0	scaffold_007.g264.t1	predicted protein
EYC84_002403	0	0	12.7746	0	0	0	scaffold_007.g268.t1	hypothetical protein SBOR_7789
EYC84_002405	19.979	29.5462	18.9303	0	0	0	scaffold_007.g270.t1	lipid phosphate phosphatase 2 protein
EYC84_002406	50.56	49.7994	39.4679	0	0	0	scaffold_007.g271.t1	nucleolar gtp-binding 2 protein
EYC84_002411	44.3146	26.7438	22.4869	0	0	0	scaffold_007.g276.t1	DnaJ domain-containing protein
EYC84_002412	39.7591	22.3509	23.347	0	0	0	scaffold_007.g277.t1	farnesyl-diphosphate farnesyltransferase
EYC84_002413	13.3294	0	12.4723	0	0	0	scaffold_007.g278.t1	TPT-domain-containing protein
EYC84_002426	0	10.313	0	0	0	0	scaffold_007.g291.t1	carboxypeptidase cpdS protein
EYC84_002429	26.568	43.4277	24.2442	0	0	0	scaffold_007.g294.t1	elongation factor G, mitochondrial
EYC84_002433	15.5164	14.5044	39.9859	0	0	0	scaffold_007.g298.t1	acyl-CoA dehydrogenase NM domain-like protein
EYC84_002436	13.1932	12.5442	33.3571	0	0	0	scaffold_007.g301.t1	General substrate transporter
EYC84_002450	0	0	14.3718	0	0	0	scaffold_007.g315.t1	cutinase transcription factor 1 alpha protein
EYC84_002452	11.0538	0	0	0	0	0	scaffold_007.g317.t1	cutinase family protein
EYC84_002454	0	11.0808	10.1971	0	0	0	scaffold_007.g319.t1	pyridoxamine 5 -phosphate oxidase protein
EYC84_002458	13.2624	13.5026	18.0944	0	0	0	scaffold_007.g323.t1	Cysteine proteinase
EYC84_002459	19.9833	0	0	0	0	0	scaffold_007.g324.t1	probable COP9 signalosome subunit 2 (CsnB)
EYC84_002473	0	13.2619	12.6325	0	0	0	scaffold_007.g338.t1	related to 3-OXOADIPATE ENOL-LACTONASE I
EYC84_002486	19.9379	13.3654	17.4692	0	0	0	scaffold_007.g351.t1	phosphoribosylaminoimidazole-succinocarboxamide synthase protein
EYC84_002488	28.6664	14.665	0	0	0	0	scaffold_007.g353.t1	Aldo/keto reductase
EYC84_002491	19.9357	0	12.385	0	0	0	scaffold_007.g356.t1	syntaxin 5
EYC84_002504	11.0041	0	0	0	0	0	scaffold_007.g369.t1	hypothetical protein DID88_007529
EYC84_002510	35.2684	10.935	19.2531	0	0	0	scaffold_007.g375.t1	predicted protein
EYC84_002514	0	10.847	11.2038	0	0	0	scaffold_007.g379.t1	Phosphotyrosyl phosphatase activator
EYC84_002519	0	10.2335	13.5297	0	0	0	scaffold_007.g384.t1	---NA---
EYC84_002521	0	0	11.2764	0	0	0	scaffold_007.g386.t1	basic proline-rich protein
EYC84_002525	0	0	18.3762	0	0	0	scaffold_007.g390.t1	nucleotide-diphospho-sugar transferase
EYC84_002531	0	0	10.4324	0	0	0	scaffold_007.g396.t1	DUF300-domain-containing protein
EYC84_002533	17.6774	0	14.6784	0	0	0	scaffold_007.g398.t1	C6 transcription factor protein
EYC84_002535	15.5834	11.8674	24.4875	10.8165	0	0	scaffold_007.g400.t1	putative phytase
EYC84_002540	13.217	23.397	14.9849	0	0	0	scaffold_007.g405.t1	Mannose-P-dolichol utilization defect 1 protein
EYC84_002545	13.3034	0	0	0	0	0	scaffold_007.g410.t1	RmlC-like cupin
EYC84_002548	17.6342	0	0	0	0	0	scaffold_007.g413.t1	related to S. pombe protein Asp1p
EYC84_002550	22.2135	22.7888	13.4137	0	0	0	scaffold_007.g415.t1	Utp21-domain-containing protein
EYC84_002558	11.0063	0	0	0	0	0	scaffold_007.g423.t1	Acetyl-CoA synthetase-like protein
EYC84_002571	28.6859	28.5035	30.0467	0	0	0	scaffold_007.g436.t1	OPT-domain-containing protein
EYC84_002575	0	0	10.0447	0	0	0	scaffold_007.g440.t1	glycoside hydrolase family 31 protein
EYC84_002576	0	11.7034	25.2606	0	0	0	scaffold_007.g441.t1	glycoside hydrolase family 3 protein
EYC84_002583	41.8791	0	0	0	0	0	scaffold_007.g448.t1	---NA---
EYC84_002584	53.0259	0	13.6799	0	0	0	scaffold_007.g449.t1	subtilisin-like protein
EYC84_002596	11.0063	26.194	31.7048	0	0	0	scaffold_007.g461.t1	RNA binding domain-containing protein
EYC84_002597	0	12.174	0	0	0	0	scaffold_007.g462.t1	V-type ATPase, C subunit family protein
EYC84_002598	39.8499	34.1183	71.5711	0	0	0	scaffold_007.g463.t1	Cell wall proline rich protein
EYC84_002599	0	0	15.7964	0	0	0	scaffold_007.g464.t1	---NA---
EYC84_002600	0	0	11.4083	0	0	0	scaffold_007.g465.t1	UBC-like protein
EYC84_002604	20.046	0	0	0	0	0	scaffold_007.g469.t1	RNA recognition domain-containing protein
EYC84_002616	11.1403	0	0	0	0	0	scaffold_007.g481.t1	terpenoid cyclases/Protein prenyltransferase
EYC84_002619	13.3942	0	0	0	0	0	scaffold_007.g484.t1	flavin-containing monooxygenase-like protein
EYC84_002622	21.939	24.0554	0	0	0	0	scaffold_007.g487.t1	WD40 repeat-like protein
EYC84_002626	0	0	16.0583	0	0	0	scaffold_007.g491.t1	pre-mRNA splicing factor atp-dependent RNA helicase prp16 protein
EYC84_002633	11.0517	17.7735	14.5849	0	0	0	scaffold_007.g498.t1	related to cystathionine beta-synthase
EYC84_002634	30.8988	24.3468	14.7249	0	0	0	scaffold_007.g499.t1	topoisomerase ii-associated protein
EYC84_002637	0	0	42.7236	0	0	0	scaffold_007.g502.t1	predicted protein
EYC84_002638	0	0	10.7549	0	0	0	scaffold_007.g503.t1	---NA---
EYC84_002643	28.6599	49.1832	40.6676	11.6512	0	0	scaffold_007.g508.t1	kinesin heavy chain
EYC84_002645	0	0	16.4323	0	0	0	scaffold_007.g510.t1	ubiquitin-conjugating enzyme E2 2
EYC84_002651	11.1619	0	12.111	0	0	0	scaffold_007.g516.t1	UBC-like protein
EYC84_002652	15.4494	14.1657	0	0	0	0	scaffold_007.g517.t1	related to DUF1014 domain protein
EYC84_002653	0	0	16.9965	0	0	0	scaffold_007.g518.t1	MFS multidrug transporter-like protein
EYC84_002655	11.1619	0	0	0	0	0	scaffold_007.g520.t1	related to positive transcriptional regulator for purine utilization
EYC84_002660	0	10.9259	0	0	0	0	scaffold_007.g525.t1	Copper resistance crd2 protein
EYC84_002662	35.2706	18.9767	39.3427	0	0	0	scaffold_007.g527.t1	Pkinase-domain-containing protein
EYC84_002668	24.3551	15.9542	15.756	0	0	0	scaffold_007.g533.t1	RNA polymerase Rpb3/RpoA insert domain-containing protein
EYC84_002673	15.4904	0	0	0	0	0	scaffold_007.g538.t1	WLM domain-containing protein
EYC84_002675	17.7272	0	0	0	0	0	scaffold_007.g540.t1	proline iminopeptidase protein
EYC84_002684	0	0	12.9528	0	0	0	scaffold_007.g549.t1	DUF254-domain-containing protein
EYC84_002685	0	0	12.5755	0	0	0	scaffold_007.g550.t1	cellular morphogenesis regulator
EYC84_002696	24.3119	26.6217	20.7998	0	0	0	scaffold_007.g561.t1	U2 snRNP auxilliary factor
EYC84_002698	13.3942	16.2206	36.1724	0	0	0	scaffold_007.g563.t1	SNase-domain-containing protein
EYC84_002701	44.2022	16.0961	24.4432	0	0	0	scaffold_007.g566.t1	cellular morphogenesis protein
EYC84_002714	0	19.7354	12.0726	0	0	0	scaffold_007.g579.t1	KH domain RNA binding protein
EYC84_002724	0	0	0	10.3314	0	0	scaffold_007.g589.t1	Nitrilotriacetate monooxygenase component A/pristinamycin IIA synthase subunit A
EYC84_002725	26.3843	0	0	0	0	0	scaffold_007.g590.t1	FAD/NAD(P)-binding domain-containing protein
EYC84_002726	41.8597	0	0	0	0	0	scaffold_007.g591.t1	DUF895 domain membrane protein
EYC84_002727	19.819	0	34.9505	0	0	0	scaffold_007.g592.t1	---NA---
EYC84_002736	28.7269	18.0038	31.2012	0	0	0	scaffold_007.g601.t1	bZIP transcription factor protein
EYC84_002737	15.3327	21.9147	29.014	0	0	0	scaffold_007.g602.t1	---NA---
EYC84_002740	26.4751	52.026	56.3135	0	0	0	scaffold_007.g605.t1	putative nadh:ubiquinone oxidoreductase subunit protein
EYC84_002745	0	35.9405	34.0774	0	0	0	scaffold_007.g610.t1	Small nuclear ribonucleoprotein Sm D1
EYC84_002746	0	24.2514	17.9598	0	0	0	scaffold_007.g611.t1	n -glutamine methyltransferase mtq2
EYC84_002749	22.0579	0	0	10.6833	0	0	scaffold_007.g614.t1	Clavaminate synthase-like protein
EYC84_002751	24.2211	33.1019	41.098	13.1941	0	0	scaffold_007.g616.t1	N-terminal nucleophile aminohydrolase
EYC84_002752	11.1619	18.7366	15.7094	0	0	0	scaffold_007.g617.t1	related to nucleoporin
EYC84_002753	11.0279	20.9427	19.3909	0	0	0	scaffold_007.g618.t1	---NA---
EYC84_002756	19.9552	36.8345	25.6306	12.639	0	0	scaffold_007.g621.t1	uroporphyrinogen decarboxylase
EYC84_002757	22.1011	0	0	0	0	0	scaffold_007.g622.t1	fungal specific transcription factor domain containing protein
EYC84_002758	0	12.5686	0	0	0	0	scaffold_007.g623.t1	WD repeat domain-containing protein
EYC84_002760	0	22.0042	0	0	0	0	scaffold_007.g625.t1	muts domain V
EYC84_002762	0	11.0623	43.0509	0	0	0	scaffold_007.g627.t1	benzoquinone reductase
EYC84_002765	0	0	10.2213	0	0	0	scaffold_007.g630.t1	related to PHD finger protein
EYC84_002770	0	0	12.7847	0	0	0	scaffold_007.g635.t1	TAM domain methyltransferase protein
EYC84_002772	13.2581	0	0	0	0	0	scaffold_007.g637.t1	GPI-anchor transamidase precursor
EYC84_002773	0	0	10.3858	0	0	0	scaffold_007.g638.t1	phosphoglycerate mutase
EYC84_002778	24.1973	24.1219	27.6807	0	0	0	scaffold_007.g643.t1	endosomal integral membrane protein
EYC84_002781	0	0	15.886	0	0	0	scaffold_007.g646.t1	related to zinc transporter
EYC84_002782	0	11.3445	13.418	0	0	0	scaffold_007.g647.t1	glycosyltransferase family 33 protein
EYC84_002784	0	0	19.0785	0	0	0	scaffold_007.g649.t1	ubiquitin carrier protein
EYC84_002789	21.9628	11.208	21.1184	0	0	0	scaffold_007.g654.t1	ubiquitin-conjugating enzyme E2
EYC84_002800	57.4215	40.6155	18.7661	0	0	0	scaffold_007.g665.t1	related to tRNA (cytosine-5-)-methyltransferase
EYC84_002801	0	15.0363	10.6574	0	0	0	scaffold_007.g666.t1	---NA---
EYC84_002802	26.568	20.1963	15.8231	0	0	0	scaffold_007.g667.t1	RPB5 subunit of DNA-directed RNA polymerase
EYC84_002803	99.4236	108.869	53.9622	17.1165	14.998	0	scaffold_007.g668.t1	nuclear segregation protein
EYC84_002806	13.217	0	12.0664	0	0	0	scaffold_007.g671.t1	serine threonine phosphatase protein
EYC84_002810	15.3564	14.7266	26.6386	0	0	0	scaffold_007.g675.t1	predicted protein
EYC84_002811	22.1703	13.3414	17.7856	0	0	0	scaffold_007.g676.t1	mitochondrial carrier
EYC84_002814	26.4059	0	0	0	0	0	scaffold_007.g679.t1	FAD/NAD(P)-binding domain-containing protein
EYC84_002815	17.725	0	0	0	0	0	scaffold_007.g680.t1	CDC45-like protein
EYC84_002824	41.8359	70.4313	18.0315	10.8275	0	0	scaffold_007.g689.t1	DEAD-domain-containing protein
EYC84_002825	11.1403	0	0	0	0	0	scaffold_007.g690.t1	WD40 repeat-like protein
EYC84_002837	10.9587	0	12.0397	0	0	0	scaffold_007.g702.t1	transglutaminase-like superfamily protein
EYC84_002840	11.0733	16.3165	11.2543	0	0	0	scaffold_007.g705.t1	WD domain-containing protein
EYC84_002841	24.2859	30.628	47.6442	0	0	0	scaffold_007.g706.t1	P34-Arc-domain-containing protein
EYC84_002842	24.3141	28.1195	22.6932	0	0	0	scaffold_007.g707.t1	ARM repeat-containing protein
EYC84_002845	0	0	20.4138	0	0	0	scaffold_007.g710.t1	hypothetical protein BCIN_06g06450
EYC84_002858	0	0	14.4575	0	0	0	scaffold_007.g723.t1	telomere-associated recQ-like helicase
EYC84_002863	0	11.7229	0	0	0	0	scaffold_004.g5.t1	prefoldin subunit 4
EYC84_002864	15.538	0	0	0	0	0	scaffold_004.g6.t1	MFS general substrate transporter
EYC84_002868	0	0	10.1906	0	0	0	scaffold_004.g10.t1	predicted protein
EYC84_002869	17.658	0	18.3035	0	0	0	scaffold_004.g11.t1	autophagy protein Atg27
EYC84_002877	19.6828	11.2951	22.3443	0	0	0	scaffold_004.g19.t1	aldolase
EYC84_002882	11.1165	10.7499	14.1184	0	0	0	scaffold_004.g24.t1	glycosyltransferase family 4 protein
EYC84_002888	0	21.6628	16.964	0	0	0	scaffold_004.g30.t1	hypothetical protein DID88_000458
EYC84_002891	24.2405	39.917	34.0247	0	0	0	scaffold_004.g33.t1	actin-like ATPase domain-containing protein
EYC84_002892	0	19.102	14.4086	0	0	0	scaffold_004.g34.t1	actin-like ATPase domain-containing protein
EYC84_002893	0	24.4394	29.5958	0	12.019	0	scaffold_004.g35.t1	glycoside hydrolase family 11 enzyme
EYC84_002904	0	10.2429	0	0	0	0	scaffold_004.g46.t1	peptidylprolyl isomerase
EYC84_002913	24.3573	20.3183	0	0	0	0	scaffold_004.g55.t1	SDA1 domain-containing protein
EYC84_002916	15.5142	16.703	36.4588	0	0	0	scaffold_004.g58.t1	bZIP transcription factor protein
EYC84_002925	0	10.5319	13.3163	0	0	0	scaffold_004.g67.t1	adenosine deaminase
EYC84_002928	28.9128	22.2652	12.0234	0	0	0	scaffold_004.g70.t1	hypothetical protein BcDW1_8087
EYC84_002932	11.0063	0	0	0	0	0	scaffold_004.g74.t1	ankyrin repeat-containing protein
EYC84_002933	11.1403	0	0	0	0	0	scaffold_004.g75.t1	ankyrin repeat-containing protein
EYC84_002937	11.0279	0	0	0	0	0	scaffold_004.g79.t1	PAP2 superfamily protein
EYC84_002940	61.9964	76.9333	53.1682	10.8865	17.163	0	scaffold_004.g82.t1	glutamate decarboxylase
EYC84_002941	0	13.7499	11.2787	0	0	0	scaffold_004.g83.t1	related to pathway-specific nitrogen regulator
EYC84_002946	19.778	18.5476	17.0304	0	0	0	scaffold_004.g88.t1	related to chicken microfibril-associated protein
EYC84_002947	11.0711	0	28.6342	12.7679	0	0	scaffold_004.g89.t1	related to acriflavine sensitivity control protein ACR-2
EYC84_002948	10.9587	11.3613	0	0	0	0	scaffold_004.g90.t1	putative aldehyde dehydrogenase
EYC84_002951	33.1938	35.7791	32.0378	0	0	0	scaffold_004.g93.t1	related to senescence marker protein 30
EYC84_002979	0	0	17.2477	0	0	0	scaffold_004.g121.t1	glycoside hydrolase family 5 protein
EYC84_002985	0	0	13.631	0	0	0	scaffold_004.g127.t1	mitochondrial putative 4-hydroxy-2-oxoglutarate aldolase
EYC84_003004	22.1205	43.7787	45.6125	0	11.7644	0	scaffold_004.g146.t1	probable 100 kda protein P100
EYC84_003006	15.4234	10.9182	10.879	0	0	0	scaffold_004.g148.t1	RhoGEF protein-like protein
EYC84_003011	0	10.235	0	0	0	0	scaffold_004.g153.t1	leucyl-tRNA synthetase
EYC84_003012	0	0	16.0241	0	0	0	scaffold_004.g154.t1	amino acid transporter
EYC84_003013	11.097	0	0	0	0	0	scaffold_004.g155.t1	dolichyl pyrophosphate phosphatase protein
EYC84_003014	0	0	94.0212	0	0	0	scaffold_004.g156.t1	p53-like transcription factor
EYC84_003019	0	14.1548	0	0	0	0	scaffold_004.g161.t1	glycoside hydrolase family 18 protein
EYC84_003020	13.3034	10.8103	28.839	0	0	0	scaffold_004.g162.t1	Med5-domain-containing protein
EYC84_003028	0	17.9476	11.8269	0	0	0	scaffold_004.g170.t1	DEAD helicases superfamily protein-like protein
EYC84_003029	11.1403	0	0	0	0	0	scaffold_004.g171.t1	guanylate kinase
EYC84_003039	0	13.4656	23.3271	0	0	0	scaffold_004.g181.t1	dTDP-D-glucose 4,6-dehydratase
EYC84_003045	26.3129	11.951	0	0	0	0	scaffold_004.g187.t1	Brix-domain-containing protein
EYC84_003046	46.4519	52.0308	30.4581	0	0	0	scaffold_004.g188.t1	glycyl-tRNA synthetase
EYC84_003049	15.5834	18.0025	17.7657	0	0	0	scaffold_004.g191.t1	psi protein
EYC84_003053	0	12.1512	31.0598	0	0	0	scaffold_004.g195.t1	ubiquitin-conjugating enzyme
EYC84_003054	22.1659	0	0	0	0	0	scaffold_004.g196.t1	Urease accessory protein
EYC84_003055	37.8185	12.8411	18.4172	0	0	0	scaffold_004.g197.t1	related to origin recognition complex subunit 2
EYC84_003056	13.2365	0	0	0	0	0	scaffold_004.g198.t1	calcium ATPase
EYC84_003059	0	0	11.9465	0	0	0	scaffold_004.g201.t1	---NA---
EYC84_003062	10.9349	23.9542	17.7393	0	0	0	scaffold_004.g204.t1	Arginine biosynthesis bifunctional protein ArgJ 1 beta chain
EYC84_003063	42.0131	51.9684	56.8824	0	0	0	scaffold_004.g205.t1	NADH-ubiquinone oxidoreductase subunit B17.2
EYC84_003072	24.4027	12.1606	27.2721	0	0	0	scaffold_004.g214.t1	probable DigA protein
EYC84_003078	0	11.4899	12.3485	0	0	0	scaffold_004.g220.t1	DUF1770-domain-containing protein
EYC84_003081	15.5142	0	12.0299	0	0	0	scaffold_004.g223.t1	smg7 protein
EYC84_003084	0	15.5966	35.17	0	0	0	scaffold_004.g226.t1	peroxin-3 family protein
EYC84_003086	0	13.0966	15.3116	0	0	0	scaffold_004.g228.t1	BcCMK3, calcium/calmodulin-dependent protein kinase
EYC84_003088	22.1227	30.1568	33.5842	0	0	0	scaffold_004.g230.t1	NADH-ubiquinone oxidoreductase 14.8 kDa subunit
EYC84_003089	0	13.6442	0	0	0	0	scaffold_004.g231.t1	dna-directed RNA polymerase i and iii 14 kda polypeptide protein
EYC84_003091	15.4494	14.1673	15.8902	0	0	0	scaffold_004.g233.t1	serine/threonine-protein kinase hal4
EYC84_003093	0	11.6048	16.3752	0	0	0	scaffold_004.g235.t1	related to MID1 protein
EYC84_003095	11.0257	0	11.5002	0	0	0	scaffold_004.g237.t1	related to cephalosporin C regulator 1 (cpcR1 gene)
EYC84_003096	17.7466	17.4182	19.2108	0	0	0	scaffold_004.g238.t1	aspartate kinase
EYC84_003104	59.5046	45.2229	25.2814	10.7532	0	0	scaffold_004.g246.t1	Cse1-domain-containing protein
EYC84_003107	10.9587	0	0	0	0	0	scaffold_004.g249.t1	Adenine nucleotide alpha hydrolases-like protein
EYC84_003110	0	0	13.978	0	0	0	scaffold_004.g252.t1	---NA---
EYC84_003113	28.5497	11.3808	0	0	0	0	scaffold_004.g255.t1	DUF185-domain-containing protein
EYC84_003119	24.5129	24.3801	14.0125	0	0	0	scaffold_004.g261.t1	ATP-dependent metallopeptidase Hfl
EYC84_003121	0	0	11.0835	0	0	0	scaffold_004.g263.t1	related to transcriptional activator Mut3p
EYC84_003123	0	0	14.682	0	0	0	scaffold_004.g265.t1	adenovirus e3 region CR2 domain-containing protein
EYC84_003129	19.8882	18.4087	20.7184	0	0	0	scaffold_004.g271.t1	ADP-ribosylation factor-like 1
EYC84_003132	17.7034	0	0	0	0	0	scaffold_004.g274.t1	---NA---
EYC84_003135	10.9587	0	14.9869	0	0	0	scaffold_004.g277.t1	glycosyltransferase family 22 protein
EYC84_003137	0	0	14.9731	0	0	0	scaffold_004.g279.t1	acyl-CoA dehydrogenase
EYC84_003138	17.7704	0	11.654	0	0	0	scaffold_004.g280.t1	14-3-3 protein
EYC84_003144	15.3996	0	0	0	0	0	scaffold_004.g286.t1	protein phosphatase 2C
EYC84_003147	26.4513	22.1387	12.0116	0	0	0	scaffold_004.g289.t1	transmembrane GTPase fzo1
EYC84_003152	11.0733	11.3821	15.6687	0	0	0	scaffold_004.g294.t1	related to dma1, component of spindle assembly checkpoint
EYC84_003153	24.3551	20.3492	13.4932	0	0	0	scaffold_004.g295.t1	Mitochondrial-processing peptidase subunit alpha protein
EYC84_003154	0	0	12.0846	0	0	0	scaffold_004.g296.t1	putative vacuolar protein sorting-associated protein
EYC84_003155	0	0	11.9608	0	0	0	scaffold_004.g297.t1	ATPase associated with various cellular activities AAA_3 protein
EYC84_003169	15.3802	0	0	0	0	0	scaffold_004.g311.t1	transcription factor spt20 protein
EYC84_003170	15.4926	14.0505	0	0	0	0	scaffold_004.g312.t1	related to EMI1 Protein required for transcriptional induction of the early meiotic-specific transcription factor IME1, also required for sporulation
EYC84_003171	13.3034	0	0	0	0	0	scaffold_004.g313.t1	escape protein-like protein 2
EYC84_003175	13.217	11.2211	11.6664	0	0	0	scaffold_004.g317.t1	Zinc finger domain-containing CCCH-type protein
EYC84_003176	22.0082	13.8273	19.9798	0	0	0	scaffold_004.g318.t1	related to myosin II
EYC84_003186	13.3056	13.9846	19.5652	0	0	0	scaffold_004.g328.t1	serine-threonine kinase receptor-associated protein
EYC84_003187	30.9204	28.015	30.4731	0	0	0	scaffold_004.g329.t1	PFU-domain-containing protein
EYC84_003190	0	0	13.9636	0	0	0	scaffold_004.g332.t1	gpi anchored protein
EYC84_003198	15.4904	0	0	0	0	0	scaffold_004.g340.t1	related to sucrose cleavage protein
EYC84_003206	15.4926	10.5614	12.6586	0	0	0	scaffold_004.g348.t1	hydroxyproline-rich glyco protein
EYC84_003208	0	0	14.4999	0	0	0	scaffold_004.g350.t1	metal ion transporter metal ion transporter
EYC84_003212	0	0	12.2648	0	0	0	scaffold_004.g354.t1	cleavage and polyadenylation specifity factor
EYC84_003214	0	0	22.803	0	0	0	scaffold_004.g356.t1	glycerol kinase
EYC84_003217	15.5164	13.4408	21.1002	0	0	0	scaffold_004.g359.t1	putative rna splicing factor protein
EYC84_003218	0	15.4601	22.444	0	0	0	scaffold_004.g360.t1	splicing factor, CC1-like protein
EYC84_003219	17.6818	18.2233	0	0	0	0	scaffold_004.g361.t1	Pet127-domain-containing protein
EYC84_003222	24.1281	13.3987	16.2612	0	0	0	scaffold_004.g364.t1	related to P.glauca late embryogenesis abundant protein and YBR177c and YPL095c
EYC84_003223	0	12.0159	0	0	0	0	scaffold_004.g365.t1	60S ribosomal subunit assembly export protein loc-1
EYC84_003224	0	20.3642	10.7408	0	0	0	scaffold_004.g366.t1	imidazoleglycerol-phosphate dehydratase
EYC84_003229	0	14.7716	27.9195	0	0	0	scaffold_004.g371.t1	serine-rich protein
EYC84_003232	0	18.9496	22.5414	0	0	0	scaffold_004.g374.t1	---NA---
EYC84_003233	0	15.3393	21.6198	0	0	0	scaffold_004.g375.t1	thioredoxin-like protein
EYC84_003234	0	0	23.7552	0	0	0	scaffold_004.g376.t1	GDP-mannose transporter
EYC84_003235	15.3996	0	14.9703	0	0	0	scaffold_004.g377.t1	GDP-mannose transporter
EYC84_003236	0	11.998	10.2981	0	0	0	scaffold_004.g378.t1	---NA---
EYC84_003237	0	11.6095	0	0	0	0	scaffold_004.g379.t1	mitochondrial outer membrane protein mmm1
EYC84_003238	0	0	16.0323	0	0	0	scaffold_004.g380.t1	glycosyltransferase family 32 protein
EYC84_003251	0	19.8973	25.728	0	0	0	scaffold_004.g393.t1	predicted protein
EYC84_003253	20.0697	0	22.3688	0	0	0	scaffold_004.g395.t1	MCM2 3 5 family protein
EYC84_003274	13.1932	11.8835	10.5685	0	0	0	scaffold_004.g416.t1	mitochondrial 2-oxodicarboxylate carrier protein
EYC84_003276	0	0	10.2864	0	0	0	scaffold_004.g418.t1	putative ef-hand calcium-binding domain protein
EYC84_003285	0	10.8589	10.8484	0	0	0	scaffold_004.g427.t1	related to eukaryotic translation initiation factor EIF-2B subunit 3
EYC84_003286	0	12.1777	27.8993	0	0	0	scaffold_004.g428.t1	peroxin 22 protein
EYC84_003287	13.1911	18.3279	0	0	0	0	scaffold_004.g429.t1	signal recognition particle, SRP19 subunit
EYC84_003294	11.0279	0	0	0	0	0	scaffold_004.g436.t1	related to mechanosensitive ion channel
EYC84_003308	70.8113	75.8224	41.47	0	0	0	scaffold_004.g450.t1	4 family polyadenylate binding protein
EYC84_003309	0	20.3931	0	0	0	0	scaffold_004.g451.t1	---NA---
EYC84_003310	0	13.1014	0	0	0	0	scaffold_004.g452.t1	hypothetical protein DID88_008442
EYC84_003311	22.0536	0	26.6555	0	0	0	scaffold_004.g453.t1	universal stress protein
EYC84_003313	13.351	25.3511	22.1514	0	0	0	scaffold_004.g455.t1	ribosomal protein S7
EYC84_003315	0	0	10.0548	0	0	0	scaffold_004.g457.t1	hypothetical protein DID88_008447
EYC84_003316	0	0	11.5911	0	0	0	scaffold_004.g458.t1	2-nitropropane dioxygenase-like protein
EYC84_003320	37.4381	40.0369	24.1692	0	0	0	scaffold_004.g462.t1	SRP40-C-like protein
EYC84_003321	22.1941	24.5995	30.8833	0	0	0	scaffold_004.g463.t1	related to SEC3-component of exocyst complex
EYC84_003327	64.4298	34.5619	32.9493	0	0	0	scaffold_004.g469.t1	related to Nup98-Nup96 precursor
EYC84_003330	15.4278	14.9859	31.6722	0	0	0	scaffold_004.g472.t1	ENTH-domain-containing protein
EYC84_003331	0	10.4767	0	0	0	0	scaffold_004.g473.t1	GTP-binding ribosome biogenesis protein
EYC84_003332	0	11.5266	0	0	0	0	scaffold_004.g474.t1	Complex 1 LYR protein
EYC84_003333	15.5358	0	0	0	0	0	scaffold_004.g475.t1	---NA---
EYC84_003337	19.8731	19.3515	30.6051	0	0	0	scaffold_004.g479.t1	QDE2 protein
EYC84_003338	0	0	13.8809	0	0	0	scaffold_004.g480.t1	MFS general substrate transporter
EYC84_003344	0	12.4482	0	0	0	0	scaffold_004.g486.t1	putative CTR1 suppressor protein
EYC84_003345	22.0773	20.5591	27.9706	0	0	0	scaffold_004.g487.t1	3-ketosteroid reductase
EYC84_003348	0	10.4084	0	0	0	0	scaffold_004.g490.t1	related to cyclin pclA
EYC84_003352	26.4297	18.9465	0	0	0	0	scaffold_004.g494.t1	Utp14-domain-containing protein
EYC84_003353	11.1186	15.7895	14.0979	0	0	0	scaffold_004.g495.t1	50S ribosomal protein YmL27
EYC84_003356	0	19.5139	28.1429	0	0	0	scaffold_004.g498.t1	---NA---
EYC84_003357	0	26.4956	35.5548	0	0	0	scaffold_004.g499.t1	---NA---
EYC84_003359	11.0754	11.9531	0	0	0	0	scaffold_004.g501.t1	1,2-dihydroxy-3-keto-5-methylthiopentene dioxygenase
EYC84_003361	0	0	12.5231	0	0	0	scaffold_004.g503.t1	der1-like family protein
EYC84_003362	19.8255	17.5486	17.8422	0	0	0	scaffold_004.g504.t1	histone H3
EYC84_003363	33.3106	45.121	20.2011	0	0	0	scaffold_004.g505.t1	homoserine kinase
EYC84_003364	35.383	26.9972	0	0	0	0	scaffold_004.g506.t1	phosphoribosylamine--glycine ligase
EYC84_003368	0	0	0	10.3292	0	0	scaffold_004.g510.t1	ARM repeat-containing protein
EYC84_003370	44.0185	30.8869	28.754	0	0	0	scaffold_004.g512.t1	putative Xaa-pro aminopeptidase P
EYC84_003371	30.8534	25.2218	33.623	10.8908	0	0	scaffold_004.g513.t1	Sad1 unc domain protein
EYC84_003374	0	12.9155	13.29	0	0	0	scaffold_004.g516.t1	Translation initiation factor eIF4e
EYC84_003380	0	0	24.7149	0	0	0	scaffold_004.g522.t1	prolipoprotein diacylglyceryl transferase
EYC84_003383	26.3367	37.9624	16.158	0	0	0	scaffold_004.g525.t1	mitochondrial import translocase, subunit Tom22
EYC84_003384	13.2818	29.1958	0	0	0	0	scaffold_004.g526.t1	---NA---
EYC84_003399	11.0063	0	13.3447	0	0	0	scaffold_004.g541.t1	Salicylate hydroxylase
EYC84_003400	24.1519	20.8148	30.0959	0	0	0	scaffold_004.g542.t1	alpha-actinin, sarcomeric (f-actin cross linking protein)
EYC84_003404	0	0	38.2583	0	0	0	scaffold_004.g546.t1	predicted protein
EYC84_003406	11.0279	16.0827	26.7056	0	0	0	scaffold_004.g548.t1	Filamentation protein
EYC84_003410	41.9915	32.3936	17.0183	0	0	0	scaffold_004.g552.t1	related to DNA-directed RNA polymerase A (I) chain
EYC84_003411	0	0	14.5204	0	0	0	scaffold_004.g553.t1	glycoside hydrolase family 13 protein
EYC84_003413	0	14.646	14.8448	0	0	0	scaffold_004.g555.t1	enoyl-CoA hydratase
EYC84_003414	22.0363	12.3358	13.1723	0	0	0	scaffold_004.g556.t1	rer1 protein
EYC84_003416	0	11.6222	12.21	0	0	0	scaffold_004.g558.t1	Paf1-domain-containing protein
EYC84_003417	0	0	21.4879	0	0	0	scaffold_004.g559.t1	autophagy related lipase
EYC84_003418	0	0	20.4083	0	0	0	scaffold_004.g560.t1	VPS9 domain protein
EYC84_003422	26.5659	22.6619	35.6529	0	0	0	scaffold_004.g564.t1	hypothetical protein SS1G_00228
EYC84_003424	13.1457	0	0	0	0	0	scaffold_004.g566.t1	2-dehydropantoate 2-reductase
EYC84_003431	15.378	14.6535	0	0	0	0	scaffold_004.g573.t1	inosine triphosphate pyrophosphatase-like protein
EYC84_003438	0	21.9566	25.1856	0	0	0	scaffold_004.g580.t1	Calcineurin subunit B
EYC84_003441	0	15.902	10.6112	0	0	0	scaffold_004.g583.t1	ribosomal protein S9/S16
EYC84_003443	22.1681	23.4579	0	0	0	0	scaffold_004.g585.t1	HAD-like protein
EYC84_003445	11.1619	13.9743	32.2854	0	0	0	scaffold_004.g587.t1	---NA---
EYC84_003452	0	0	11.2357	0	0	0	scaffold_004.g594.t1	Pkinase-domain-containing protein
EYC84_003457	11.0711	0	0	0	0	0	scaffold_004.g599.t1	---NA---
EYC84_003462	13.1457	0	20.8386	0	0	0	scaffold_004.g604.t1	GTP cyclohydrolase II
EYC84_003464	15.471	16.1499	14.3516	0	0	0	scaffold_004.g606.t1	related to ELF1 Protein required for growth on glycerol mediumTranscription elongation factor, implicated in the maintenance of proper chromatin structure
EYC84_003465	24.1973	25.6357	25.3908	0	0	0	scaffold_004.g607.t1	PRTase-like protein
EYC84_003469	26.4557	18.8261	11.1304	0	0	0	scaffold_004.g611.t1	mitochondrial 37S ribosomal protein rsm10
EYC84_003470	39.7203	24.9746	12.4641	0	0	0	scaffold_004.g612.t1	probable FCF2 Essential nucleolar protein involved in the early steps of 35S rRNA processing
EYC84_003472	15.538	21.3983	17.9054	0	0	0	scaffold_004.g614.t1	histone-fold-containing protein
EYC84_003481	0	0	17.132	0	0	0	scaffold_004.g623.t1	---NA---
EYC84_003482	0	0	11.494	0	0	0	scaffold_004.g624.t1	---NA---
EYC84_003486	15.3327	16.1378	18.2546	0	0	0	scaffold_004.g628.t1	CaaX farnesyltransferas-like protein beta subunit Ram1
EYC84_003489	0	0	15.4296	0	0	0	scaffold_004.g631.t1	---NA---
EYC84_003490	0	0	13.1743	0	0	0	scaffold_004.g632.t1	---NA---
EYC84_003491	28.9322	0	18.1937	0	0	0	scaffold_004.g633.t1	---NA---
EYC84_003497	0	0	10.4971	0	0	0	scaffold_004.g639.t1	---NA---
EYC84_003503	0	0	15.3198	0	0	0	scaffold_004.g645.t1	hypothetical protein SBOR_0233
EYC84_003507	0	10.336	0	0	0	0	scaffold_004.g649.t1	YTH-domain-containing protein
EYC84_003510	0	12.6214	10.6148	0	0	0	scaffold_004.g652.t1	NAD(P)-binding protein
EYC84_003511	26.4319	0	11.997	0	0	0	scaffold_004.g653.t1	carbonic anhydrase
EYC84_003512	59.63	104.198	46.7057	21.6331	0	0	scaffold_004.g654.t1	---NA---
EYC84_003522	0	0	14.1851	0	0	0	scaffold_004.g664.t1	---NA---
EYC84_003526	0	10.1657	0	0	0	0	scaffold_004.g668.t1	upf0664 stress-induced protein
EYC84_003535	15.5812	20.0179	37.7954	0	0	0	scaffold_004.g677.t1	---NA---
EYC84_003547	26.4729	11.4387	0	0	0	0	scaffold_004.g689.t1	---NA---
EYC84_003550	0	0	10.9236	0	0	0	scaffold_004.g692.t1	cytosolic regulator Pianissimo
EYC84_003551	0	0	13.6695	0	0	0	scaffold_004.g693.t1	uricase
EYC84_003556	0	14.3049	17.1731	0	0	0	scaffold_004.g698.t1	related to NADPH oxidase cytosolic protein p67phox
EYC84_003559	0	20.2068	18.2768	0	0	0	scaffold_004.g701.t1	kinase-like protein
EYC84_003562	0	16.4938	0	0	0	0	scaffold_004.g704.t1	surface SP1 protein
EYC84_003564	0	0	11.4956	0	0	0	scaffold_004.g706.t1	ribosomal l34e protein
EYC84_003569	0	13.7	10.6639	0	0	0	scaffold_004.g711.t1	prephenate dehydrogenase
EYC84_003570	42.106	28.7045	16.6245	0	0	0	scaffold_004.g712.t1	---NA---
EYC84_003576	33.2436	11.8599	20.4304	0	0	0	scaffold_004.g718.t1	---NA---
EYC84_003577	46.4606	33.1275	36.6917	0	0	0	scaffold_004.g719.t1	Transcriptional regulator protein
EYC84_003578	0	17.347	16.3163	0	0	0	scaffold_004.g720.t1	---NA---
EYC84_003589	79.5398	99.9606	61.1542	17.3851	13.8748	0	scaffold_004.g731.t1	probable ATP-dependent RNA helicase dbp2
EYC84_003590	19.8234	31.5453	16.8258	0	0	0	scaffold_004.g732.t1	---NA---
EYC84_003591	13.3726	10.3368	22.4254	0	0	0	scaffold_004.g733.t1	glycosyltransferase family 90 protein
EYC84_003593	104.15	119.287	62.9813	12.2106	11.3735	0	scaffold_004.g735.t1	---NA---
EYC84_003595	103.919	133.925	58.8451	16.0544	15.7718	0	scaffold_004.g737.t1	Putative Peptidyl-prolyl cis-trans isomerase pin4
EYC84_003601	0	10.2178	0	0	0	0	scaffold_004.g743.t1	Pseudouridine synthase Pus7 protein
EYC84_003607	17.8374	11.1481	0	0	0	0	scaffold_004.g749.t1	DEAD-domain-containing protein
EYC84_003609	28.7378	18.2583	29.0424	0	0	0	scaffold_004.g751.t1	map kinase kinase
EYC84_003614	48.4357	30.0346	17.9116	0	0	0	scaffold_004.g756.t1	porphobilinogen deaminase
EYC84_003615	24.2837	31.3248	18.3582	0	0	0	scaffold_004.g757.t1	glycine cleavage system H protein
EYC84_003617	0	0	17.0246	0	0	0	scaffold_004.g759.t1	septum-promoting GTP-binding protein 1
EYC84_003620	26.4275	41.7284	34.3719	0	0	0	scaffold_004.g762.t1	related to cylicin I
EYC84_003621	0	16.7047	12.7358	0	0	0	scaffold_004.g763.t1	putative Cullin-associated NEDD8-dissociated protein 1
EYC84_003622	30.8274	28.3592	15.9997	0	0	0	scaffold_004.g764.t1	---NA---
EYC84_003623	147.976	116.196	53.986	12.6456	16.1697	0	scaffold_004.g765.t1	translation elongation factor tu
EYC84_003627	0	10.5438	0	0	0	0	scaffold_004.g769.t1	related to triacylglycerol lipase
EYC84_003631	19.8255	10.3065	0	0	0	0	scaffold_004.g773.t1	emopamil binding protein
EYC84_003632	0	19.2004	0	0	0	0	scaffold_004.g774.t1	---NA---
EYC84_003633	0	18.2422	0	0	0	0	scaffold_004.g775.t1	glucose-repressible protein
EYC84_003635	0	0	17.9908	0	0	0	scaffold_004.g777.t1	tyrosyl-DNA phosphodiesterase domain protein
EYC84_003637	0	0	13.0362	0	0	0	scaffold_004.g779.t1	---NA---
EYC84_003639	17.6148	11.9617	25.3036	0	0	0	scaffold_004.g781.t1	---NA---
EYC84_003640	0	10.5181	19.0746	0	0	0	scaffold_004.g782.t1	---NA---
EYC84_003643	15.4516	15.3305	0	0	0	0	scaffold_004.g785.t1	glucose-inhibited division protein A subfamily
EYC84_003648	26.3346	0	0	0	0	0	scaffold_004.g790.t1	---NA---
EYC84_003649	19.8882	21.3899	24.8774	0	0	0	scaffold_004.g791.t1	microsomal signal peptidase 12 kDa subunit
EYC84_003650	15.4688	16.8216	14.3047	0	0	0	scaffold_004.g792.t1	---NA---
EYC84_003652	0	14.2319	20.8829	0	0	0	scaffold_004.g794.t1	RING-box protein 1
EYC84_003653	0	0	11.8041	0	0	0	scaffold_004.g795.t1	proteophosphoglycan 5
EYC84_003663	0	10.3882	0	0	0	0	scaffold_004.g805.t1	Acyl-CoA N-acyltransferases (Nat)
EYC84_003666	0	0	17.8465	0	0	0	scaffold_004.g808.t1	hypothetical protein DID88_004877
EYC84_003667	11.097	0	0	0	0	0	scaffold_004.g809.t1	related to polypeptide chain release factors
EYC84_003670	10.9349	0	0	0	0	0	scaffold_004.g812.t1	RCC1 domain-containing protein
EYC84_003672	50.8302	76.191	31.2928	13.9654	0	0	scaffold_004.g814.t1	iron-sulfur cluster assembly accessory protein
EYC84_003675	22.0557	0	0	0	0	0	scaffold_004.g817.t1	NAD-specific glutamate dehydrogenase
EYC84_003694	26.3605	12.6862	21.7798	0	0	0	scaffold_004.g836.t1	related to SREBP cleavage activating protein
EYC84_003699	13.3056	0	0	0	0	0	scaffold_004.g841.t1	glycoside hydrolase family 16 protein
EYC84_003700	0	11.292	0	0	0	0	scaffold_004.g842.t1	kinase-like protein
EYC84_003703	35.3138	30.772	17.3288	0	0	0	scaffold_004.g845.t1	serine/threonine-protein phosphatase 5
EYC84_003704	0	11.0341	0	0	0	0	scaffold_004.g846.t1	---NA---
EYC84_003705	75.0015	126.228	45.687	0	16.6793	0	scaffold_004.g847.t1	saccharopine dehydrogenase
EYC84_003706	15.4732	25.4287	16.7464	0	0	0	scaffold_004.g848.t1	centromere microtubule-binding Cbf5 protein
EYC84_003712	0	0	17.6028	0	0	0	scaffold_004.g854.t1	---NA---
EYC84_003713	11.0754	0	18.0859	0	0	0	scaffold_004.g855.t1	predicted protein
EYC84_003716	0	19.9843	10.39	0	0	0	scaffold_004.g858.t1	predicted protein
EYC84_003722	0	0	14.2054	0	0	0	scaffold_004.g864.t1	---NA---
EYC84_003727	22.1897	12.1194	17.9058	0	0	0	scaffold_004.g869.t1	---NA---
EYC84_003732	37.7061	19.5397	20.1278	0	0	0	scaffold_004.g874.t1	pentatricopeptide repeat protein
EYC84_003749	0	21.4025	10.3372	0	0	0	scaffold_004.g891.t1	HEAT repeat protein-like protein
EYC84_003756	11.1403	0	10.7242	0	0	0	scaffold_004.g898.t1	WD40 repeat-like protein
EYC84_003757	0	0	13.834	0	0	0	scaffold_004.g899.t1	DNase I-like protein
EYC84_003763	13.2581	13.3675	11.5931	0	0	0	scaffold_004.g905.t1	probable mitotic checkpoint serine/threonine protein kinase
EYC84_003773	0	11.4861	12.8599	0	0	0	scaffold_004.g915.t1	related to ubiquitin--protein ligase
EYC84_003774	17.7488	40.392	39.3669	0	0	0	scaffold_004.g916.t1	---NA---
EYC84_003775	28.621	13.1453	13.9314	0	0	0	scaffold_004.g917.t1	related to RNA binding protein Pym
EYC84_003776	0	11.5084	0	0	0	0	scaffold_004.g918.t1	nucleoside hydrolase
EYC84_003790	11.097	16.4372	0	10.0584	0	0	scaffold_004.g932.t1	DEAD DEAH box helicase protein
EYC84_003791	24.3119	54.6593	31.9749	0	0	0	scaffold_004.g933.t1	putative Acyl-CoA-binding protein like protein
EYC84_003797	17.7228	16.4935	28.5104	0	0	0	scaffold_004.g939.t1	Yip1 domain-containing protein
EYC84_003817	13.2646	0	0	0	0	0	scaffold_004.g959.t1	nlp p60 protein
EYC84_003820	28.7053	26.5035	32.3502	0	0	0	scaffold_004.g962.t1	adenylyl cyclase-associated protein
EYC84_003825	0	13.5049	0	0	0	0	scaffold_004.g967.t1	DNA replication licensing factor mcm3
EYC84_003827	19.9336	22.0941	22.4192	0	0	0	scaffold_004.g969.t1	hypothetical protein DID88_000337
EYC84_003828	26.4037	27.2976	12.8801	10.6855	0	0	scaffold_004.g970.t1	60S ribosomal protein L3
EYC84_003829	0	13.0938	0	0	0	0	scaffold_004.g971.t1	---NA---
EYC84_003830	55.4787	37.7877	19.6531	0	0	0	scaffold_004.g972.t1	La domain-containing protein
EYC84_003831	42.0369	30.4311	14.8836	0	0	0	scaffold_004.g973.t1	alpha-L RNA-binding motif-containing protein
EYC84_003832	19.8666	18.6968	40.9543	0	0	0	scaffold_004.g974.t1	acyltransferase ChoActase/COT/CPT
EYC84_003835	15.5596	0	25.4437	0	0	0	scaffold_004.g977.t1	cyclin protein
EYC84_003839	0	0	17.6396	0	0	0	scaffold_004.g981.t1	Exo70 exocyst complex subunit
EYC84_003841	30.7367	0	0	0	0	0	scaffold_004.g983.t1	OPT superfamily oligopeptide transporter
EYC84_003858	44.3146	36.3311	21.2588	0	0	0	scaffold_004.g1000.t1	DNA-directed RNA polymerase I polypeptide 2
EYC84_003862	0	10.5114	20.7751	0	0	0	scaffold_002.g2.t1	clathrin coat assembly protein
EYC84_003865	13.1932	17.2259	12.7785	0	0	0	scaffold_002.g5.t1	histidinol-phosphate aminotransferase
EYC84_003870	15.4732	26.581	10.0138	0	0	0	scaffold_002.g10.t1	diphthine synthase
EYC84_003879	17.6602	10.8594	24.8654	0	0	0	scaffold_002.g19.t1	choriogenin Hminor protein
EYC84_003888	0	15.2925	12.0706	0	0	0	scaffold_002.g28.t1	mitochondrial intermediate peptidase protein
EYC84_003889	35.4954	41.9511	32.8991	0	0	0	scaffold_002.g29.t1	related to mitochondrial protein
EYC84_003893	24.2449	33.8731	40.5377	0	0	0	scaffold_002.g33.t1	proteasome subunit beta type-5 precursor
EYC84_003895	0	13.935	0	0	0	0	scaffold_002.g35.t1	translation factor
EYC84_003896	26.3605	30.5697	38.8326	0	0	0	scaffold_002.g36.t1	coatomer zeta subunit
EYC84_003898	0	12.1057	10.5907	0	0	0	scaffold_002.g38.t1	MCM-domain-containing protein
EYC84_003900	11.0041	0	21.9345	0	0	0	scaffold_002.g40.t1	VTC domain-containing protein
EYC84_003903	55.2345	64.1084	29.6959	0	0	0	scaffold_002.g43.t1	putative Hexokinase
EYC84_003904	15.5402	12.3358	0	0	0	0	scaffold_002.g44.t1	arginine N-methyltransferase 2
EYC84_003910	0	0	11.8025	0	0	0	scaffold_002.g50.t1	cytochrome P450
EYC84_003914	10.9587	12.3036	17.952	0	0	0	scaffold_002.g54.t1	related to C6 finger domain protein
EYC84_003926	0	0	14.1158	0	0	0	scaffold_002.g66.t1	glycosyltransferase family 22 protein
EYC84_003927	0	16.0141	0	0	0	0	scaffold_002.g67.t1	NAF1-domain-containing protein
EYC84_003930	0	0	30.9726	0	0	0	scaffold_002.g70.t1	Extradiol aromatic ring-opening dioxygenase
EYC84_003932	52.8572	44.5255	54.0146	13.3295	16.0232	0	scaffold_002.g72.t1	thioredoxin-domain-containing protein
EYC84_003933	15.538	0	0	0	0	0	scaffold_002.g73.t1	DUF605-domain-containing protein
EYC84_003934	26.6329	0	38.7544	0	0	0	scaffold_002.g74.t1	related to integral membrane protein
EYC84_003937	39.7785	14.2206	14.995	11.4569	0	0	scaffold_002.g77.t1	Oligopeptide transporter OPT superfamily protein
EYC84_003939	11.0538	0	0	0	0	0	scaffold_002.g79.t1	Ras GTPase activating
EYC84_003941	15.605	0	0	0	0	0	scaffold_002.g81.t1	endoglucanase-like protein II
EYC84_003963	0	0	11.8491	0	0	0	scaffold_002.g103.t1	---NA---
EYC84_003965	22.0363	0	16.3082	0	0	0	scaffold_002.g105.t1	related to glutamate carboxypeptidase II
EYC84_003972	0	0	11.7025	0	0	0	scaffold_002.g112.t1	related to endoplasmic reticulum retention receptor
EYC84_003975	0	54.1574	131.855	0	0	0	scaffold_002.g115.t1	alcohol dehydrogenase
EYC84_003979	0	0	13.6066	0	0	0	scaffold_002.g119.t1	related to DHA14-like major facilitator efflux transporter (MFS transporter)
EYC84_003980	17.6602	10.2243	12.0784	0	0	0	scaffold_002.g120.t1	related to multidrug resistance protein
EYC84_003990	26.4341	12.1685	15.0986	0	0	0	scaffold_002.g130.t1	calcineurin-like phosphoesterase protein
EYC84_003992	39.8953	25.8872	29.243	0	0	0	scaffold_002.g132.t1	small nuclear ribonucleoprotein g
EYC84_003994	15.4256	32.5763	12.7847	15.6238	0	0	scaffold_002.g134.t1	DUF699-domain-containing protein
EYC84_003996	11.0538	19.8894	11.6807	0	0	0	scaffold_002.g136.t1	putative u5 small nuclear ribonucleoprotein component protein
EYC84_003998	0	0	15.4192	0	0	0	scaffold_002.g138.t1	transcription factor Cys6
EYC84_003999	0	0	11.4044	0	0	0	scaffold_002.g139.t1	hypothetical protein BCIN_05g07370
EYC84_004000	22.1703	14.6601	19.2088	0	0	0	scaffold_002.g140.t1	arsenate reductase protein
EYC84_004002	26.4081	0	14.3415	0	0	0	scaffold_002.g142.t1	thioredoxin protein
EYC84_004003	0	0	10.4851	0	0	0	scaffold_002.g143.t1	PX domain-containing protein
EYC84_004009	0	17.9289	42.7753	0	0	0	scaffold_002.g149.t1	cation efflux protein
EYC84_004015	17.7682	0	0	0	0	0	scaffold_002.g155.t1	lysyl-tRNA synthetase
EYC84_004016	20.0027	24.5321	0	0	0	0	scaffold_002.g156.t1	probable mitochondrial import inner membrane translocase subunit TIM10
EYC84_004017	17.6558	14.0132	29.7581	0	0	0	scaffold_002.g157.t1	putative sin3 complex subunit protein
EYC84_004023	0	0	14.9119	0	0	0	scaffold_002.g163.t1	related to cell division control protein/predicted DNA repair exonuclease
EYC84_004024	0	0	11.3396	0	0	0	scaffold_002.g164.t1	CAP20-like protein
EYC84_004026	0	0	25.8251	0	0	0	scaffold_002.g166.t1	putative chaperone protein HSP31
EYC84_004032	13.3488	0	0	0	0	0	scaffold_002.g172.t1	RhoGAP-domain-containing protein
EYC84_004033	0	24.7663	12.4133	0	0	0	scaffold_002.g173.t1	probable translocase of inner membrane
EYC84_004034	26.5659	35.6338	15.1898	0	0	0	scaffold_002.g174.t1	nucleoporin-like protein
EYC84_004035	61.9748	28.652	27.4409	0	0	0	scaffold_002.g175.t1	anthranilate synthase
EYC84_004040	48.5806	65.8479	60.6107	0	12.9987	0	scaffold_002.g180.t1	DUF543 domain protein
EYC84_004042	13.2818	0	0	0	0	0	scaffold_002.g182.t1	ATP-dependent RNA helicase rok1
EYC84_004048	0	21.4747	39.6936	0	0	0	scaffold_002.g188.t1	---NA---
EYC84_004054	0	0	11.4572	0	0	0	scaffold_002.g194.t1	predicted protein
EYC84_004065	0	0	14.6982	0	0	0	scaffold_002.g205.t1	related to CYC8 General repressor of transcription
EYC84_004066	19.7542	17.1858	19.8415	0	0	0	scaffold_002.g206.t1	Glycolate oxidase protein
EYC84_004072	30.983	12.9152	33.5011	0	0	0	scaffold_002.g212.t1	glycoside hydrolase family 72 protein
EYC84_004083	0	0	10.7105	0	0	0	scaffold_002.g223.t1	---NA---
EYC84_004084	0	0	11.3477	0	0	0	scaffold_002.g224.t1	hypothetical protein DID88_002848
EYC84_004087	53.0885	43.724	53.3911	0	10.7946	0	scaffold_002.g227.t1	related to Protein OS-9 homolog
EYC84_004103	46.3654	54.7852	38.9528	0	0	0	scaffold_002.g243.t1	histidine biosynthesis trifunctional protein
EYC84_004107	17.5672	0	27.611	0	0	0	scaffold_002.g247.t1	related to peroxisomal membrane protein pex13
EYC84_004112	33.0814	26.3513	24.3777	0	0	0	scaffold_002.g252.t1	cut8 proteasome-binding domain-containing protein
EYC84_004119	48.6714	45.844	42.4532	0	0	0	scaffold_002.g259.t1	casein kinase II
EYC84_004125	22.2373	14.9975	11.5119	0	0	0	scaffold_002.g265.t1	transcription elongation factor S-II
EYC84_004131	13.2581	0	14.9077	0	0	0	scaffold_002.g271.t1	autophagy apg6 protein
EYC84_004141	15.4256	19.6466	11.2483	0	0	0	scaffold_002.g281.t1	ribose-phosphate pyrophosphokinase
EYC84_004147	0	13.4782	0	0	0	0	scaffold_002.g287.t1	pseudouridine synthase
EYC84_004148	15.4688	21.9604	31.4306	0	0	0	scaffold_002.g288.t1	vesicular-fusion protein sec18
EYC84_004152	11.0063	11.0845	0	0	0	0	scaffold_002.g292.t1	ATP-dependent rRNA helicase spb4
EYC84_004153	15.5358	0	0	0	0	0	scaffold_002.g293.t1	cytidylyltransferase
EYC84_004158	105.861	82.1064	44.1246	0	14.4653	0	scaffold_002.g298.t1	putative nucleolar protein 58
EYC84_004159	17.6104	27.5561	55.5855	0	0	0	scaffold_002.g299.t1	vacuolar ATP synthase subunit d
EYC84_004160	48.6692	32.2515	26.574	0	0	0	scaffold_002.g300.t1	ribosomal protein-like protein S15
EYC84_004162	11.0711	0	0	0	0	0	scaffold_002.g302.t1	---NA---
EYC84_004169	26.6588	32.8457	21.08	0	0	0	scaffold_002.g309.t1	ornithine decarboxylase
EYC84_004170	26.5464	0	0	0	0	0	scaffold_002.g310.t1	predicted protein
EYC84_004171	26.5421	12.6632	0	0	0	0	scaffold_002.g311.t1	presequence protease-like protein
EYC84_004172	15.3564	0	0	0	0	0	scaffold_002.g312.t1	myosin-like coiled-coil protein
EYC84_004174	0	0	17.248	0	0	0	scaffold_002.g314.t1	C6 zinc finger protein
EYC84_004182	0	12.2442	11.4305	0	0	0	scaffold_002.g322.t1	pci domain-containing protein
EYC84_004184	15.445	10.2144	13.217	0	0	0	scaffold_002.g324.t1	rgs domain containing protein
EYC84_004187	35.2944	23.193	13.5316	0	0	0	scaffold_002.g327.t1	---NA---
EYC84_004189	0	10.8268	0	14.4306	0	0	scaffold_002.g329.t1	probable ubiquitin-conjugating enzyme E2-C
EYC84_004200	0	15.1652	0	0	0	0	scaffold_002.g340.t1	methionyl-tRNA synthetase
EYC84_004208	48.3665	50.3278	72.4376	18.9847	18.9043	0	scaffold_002.g348.t1	class I/II aminotransferas-like protein
EYC84_004213	0	20.7723	20.349	0	0	0	scaffold_002.g353.t1	NAD(P)-binding protein
EYC84_004216	28.8198	45.584	27.5181	0	0	0	scaffold_002.g356.t1	---NA---
EYC84_004218	0	14.9712	17.9093	0	0	0	scaffold_002.g358.t1	ENTH-domain-containing protein
EYC84_004226	11.0041	0	15.1595	0	0	0	scaffold_002.g366.t1	related to morphogenesis-related protein MSB1
EYC84_004227	24.2665	44.0565	19.5215	0	0	0	scaffold_002.g367.t1	formyltetrahydrofolate deformylase
EYC84_004237	0	0	13.5235	0	0	0	scaffold_002.g377.t1	hypothetical protein sscle_05g043610
EYC84_004238	13.2127	0	18.226	0	0	0	scaffold_002.g378.t1	FAR-17a AIG1 protein
EYC84_004239	0	0	13.7773	0	0	0	scaffold_002.g379.t1	peroxisomal biogenesis factor 2
EYC84_004242	0	0	17.0349	0	0	0	scaffold_002.g382.t1	3 exoribonuclease family protein
EYC84_004243	44.2887	19.4399	14.7816	0	0	0	scaffold_002.g383.t1	NIF-domain-containing protein
EYC84_004247	0	0	11.4715	0	0	0	scaffold_002.g387.t1	RmlC-like cupin
EYC84_004251	0	38.2458	26.3079	0	0	0	scaffold_002.g391.t1	manganese superoxide dismutase
EYC84_004253	0	0	16.3646	0	0	0	scaffold_002.g393.t1	S-adenosyl-L-methionine-dependent methyltransferase
EYC84_004259	181.034	0	0	49.2819	0	0	scaffold_002.g399.t1	endo-rhamnogalacturonase F
EYC84_004261	15.3802	0	0	0	0	0	scaffold_002.g401.t1	tfdA family taurine dioxygenase
EYC84_004263	15.4494	0	11.6279	0	0	0	scaffold_002.g403.t1	succinate-semialdehyde dehydrogenase protein
EYC84_004269	0	22.0498	27.8751	0	0	0	scaffold_002.g409.t1	hypothetical protein DID88_008923
EYC84_004271	0	0	15.4863	0	0	0	scaffold_002.g411.t1	putative glucose transporter rco-3
EYC84_004275	22.1919	0	26.8943	0	0	0	scaffold_002.g415.t1	flavocytochrome c
EYC84_004278	21.9628	18.3715	17.9624	0	0	0	scaffold_002.g418.t1	related to transcription regulatory protein
EYC84_004284	0	0	15.6873	0	0	0	scaffold_002.g424.t1	predicted protein
EYC84_004286	0	0	19.8727	0	0	0	scaffold_002.g426.t1	cytochrome P450
EYC84_004290	11.1403	0	0	0	0	0	scaffold_002.g430.t1	maintenance of telomere capping 1 protein
EYC84_004291	15.5596	13.2512	11.4858	0	0	0	scaffold_002.g431.t1	related to D.melanogaster troponin T and human nucleolin
EYC84_004294	15.538	17.4539	20.5588	0	0	0	scaffold_002.g434.t1	SPS1, Serine threonine protein kinase
EYC84_004295	17.591	50.9346	18.9244	0	0	0	scaffold_002.g435.t1	YjgF-like protein
EYC84_004299	0	0	17.2826	0	0	0	scaffold_002.g439.t1	com1 regulatory protein
EYC84_004302	11.0257	11.5331	27.4448	0	0	0	scaffold_002.g442.t1	Dynein light chain
EYC84_004303	24.3379	0	0	0	0	0	scaffold_002.g443.t1	RNA-binding domain-containing protein
EYC84_004309	30.9226	18.0611	0	0	0	0	scaffold_002.g449.t1	PALP-domain-containing protein
EYC84_004310	13.3726	12.6995	0	0	0	0	scaffold_002.g450.t1	DUF185-domain-containing protein
EYC84_004318	22.1703	0	0	0	0	0	scaffold_002.g458.t1	related to sensory transduction histidine kinase
EYC84_004324	0	0	10.3512	0	0	0	scaffold_002.g464.t1	Fibronectin type III domain-containing protein
EYC84_004326	0	0	20.063	0	0	0	scaffold_002.g466.t1	LNS2-domain-containing protein
EYC84_004329	11.1165	0	14.1646	0	0	0	scaffold_002.g469.t1	---NA---
EYC84_004337	22.1919	45.6951	23.6288	0	0	0	scaffold_002.g477.t1	saccharopine dehydrogenase
EYC84_004341	17.591	0	16.9454	0	0	0	scaffold_002.g481.t1	glycosyltransferase family 31 protein
EYC84_004348	35.3398	18.3307	37.4406	0	0	0	scaffold_002.g488.t1	phosphatidylinositol-specific phospholipase
EYC84_004350	0	0	26.3141	0	0	0	scaffold_002.g490.t1	hypothetical protein DID88_008850
EYC84_004351	0	0	31.5101	0	0	0	scaffold_002.g491.t1	hypothetical protein DID88_008849
EYC84_004356	50.6292	33.1564	12.0237	0	0	0	scaffold_002.g496.t1	Noc2-domain-containing protein
EYC84_004358	0	0	16.0606	0	0	0	scaffold_002.g498.t1	S-adenosyl-L-methionine-dependent methyltransferase
EYC84_004359	0	0	12.196	0	0	0	scaffold_002.g499.t1	hypothetical protein SPBR_06644
EYC84_004361	0	0	12.8778	0	0	0	scaffold_002.g501.t1	predicted protein
EYC84_004369	0	16.7644	11.4839	0	0	0	scaffold_002.g509.t1	SAPS-domain-containing protein
EYC84_004374	0	0	14.3373	0	0	0	scaffold_002.g514.t1	outer arm dynein light chain 1
EYC84_004375	0	12.5804	10.2212	0	0	0	scaffold_002.g515.t1	Actin/actin-like protein
EYC84_004379	0	0	13.7734	0	0	0	scaffold_002.g519.t1	related to RLM1-transcription factor of the MADS box family
EYC84_004388	17.7228	0	0	0	0	0	scaffold_002.g528.t1	DNA-directed RNA polymeras-like protein II subunit RPB11
EYC84_004389	26.6113	0	11.2624	0	0	0	scaffold_002.g529.t1	related to FMN-dependent 2-nitropropane dioxygenase
EYC84_004407	19.8428	0	0	0	0	0	scaffold_002.g547.t1	chromatin modification-related protein
EYC84_004408	11.0538	0	0	0	0	0	scaffold_002.g548.t1	Undecaprenyl diphosphate synthase
EYC84_004410	10.9825	13.4141	0	0	0	0	scaffold_002.g550.t1	ribosomal L34 protein
EYC84_004411	26.4059	14.0749	0	0	0	0	scaffold_002.g551.t1	predicted protein
EYC84_004412	35.1582	48.2997	47.2074	13.3383	0	0	scaffold_002.g552.t1	putative CAAX prenyl protease 1
EYC84_004416	0	14.9962	20.8142	0	0	0	scaffold_002.g556.t1	ATP-dependent metallopeptidase Hfl
EYC84_004418	35.6315	12.678	38.2143	0	0	0	scaffold_002.g558.t1	mevalonate kinase
EYC84_004422	13.2127	32.4404	18.3807	0	0	0	scaffold_002.g562.t1	igr domain-containing protein
EYC84_004424	0	0	15.6505	0	0	0	scaffold_002.g564.t1	INO80 chromatin remodeling complex Ies1 protein
EYC84_004428	0	0	14.7494	0	0	0	scaffold_002.g568.t1	DnaJ-domain-containing protein
EYC84_004430	0	0	13.0323	0	0	0	scaffold_002.g570.t1	FAD/NAD(P)-binding domain-containing protein
EYC84_004454	44.2001	0	0	0	0	0	scaffold_002.g594.t1	related to sulfonate dioxygenase
EYC84_004458	0	0	18.3361	0	0	0	scaffold_002.g598.t1	Eisosome 1 protein
EYC84_004462	0	10.2768	22.9711	0	0	0	scaffold_002.g602.t1	quercetin 3-O-methyltransferase 1 protein
EYC84_004466	11.0495	0	0	0	0	0	scaffold_002.g606.t1	serine/threonine-protein kinase
EYC84_004468	0	0	10.7509	0	0	0	scaffold_002.g608.t1	Acyltransferase family protein
EYC84_004469	0	0	11.1549	0	0	0	scaffold_002.g609.t1	hyaluronan synthase
EYC84_004474	13.2408	0	0	0	0	0	scaffold_002.g614.t1	C6 zinc finger domain protein
EYC84_004475	19.979	14.0151	18.5937	0	0	0	scaffold_002.g615.t1	c2h2 transcription factor protein
EYC84_004491	11.0041	0	0	0	0	0	scaffold_002.g631.t1	---NA---
EYC84_004492	11.1165	11.1617	0	0	0	0	scaffold_002.g632.t1	MRS7 family protein
EYC84_004500	0	0	16.5515	0	0	0	scaffold_002.g640.t1	predicted protein
EYC84_004503	0	0	16.229	0	0	0	scaffold_002.g643.t1	predicted protein
EYC84_004513	0	10.7143	0	0	0	0	scaffold_002.g653.t1	cobW domain-containing protein
EYC84_004519	22.0773	10.8035	27.4836	0	0	0	scaffold_002.g659.t1	high-affinity methionine permease protein
EYC84_004522	13.3272	11.6089	0	0	0	0	scaffold_002.g662.t1	actin binding protein-like protein
EYC84_004523	0	11.4906	0	0	0	0	scaffold_002.g663.t1	putative urb2 npa2 family protein
EYC84_004527	13.1911	18.2586	12.4762	0	0	0	scaffold_002.g667.t1	CypX, Cytochrome P450
EYC84_004529	0	11.5415	0	0	0	0	scaffold_002.g669.t1	seryl-tRNA synthetase
EYC84_004530	0	0	11.9895	0	0	0	scaffold_002.g670.t1	chromosome segregation ATPase family protein
EYC84_004532	123.465	108.984	50.2683	10.8209	10.3934	0	scaffold_002.g672.t1	---NA---
EYC84_004536	15.404	0	12.7218	0	0	0	scaffold_002.g676.t1	tetratricopeptide repeat domain-containing protein
EYC84_004537	22.0514	13.0881	13.5542	0	0	0	scaffold_002.g677.t1	AP-3 complex subunit delta
EYC84_004538	15.4494	44.8851	42.7418	0	0	0	scaffold_002.g678.t1	predicted protein
EYC84_004539	33.0792	27.5058	39.1066	0	0	0	scaffold_002.g679.t1	predicted protein
EYC84_004553	35.2468	20.1636	11.5712	0	0	0	scaffold_002.g693.t1	WD40 repeat-like protein
EYC84_004554	22.0752	30.6955	31.2159	0	0	0	scaffold_002.g694.t1	putative proteasome subunit beta type-2
EYC84_004556	101.6	77.2733	44.155	17.737	12.2805	0	scaffold_002.g696.t1	DEAD-domain-containing protein
EYC84_004557	44.2476	36.3763	17.5197	0	0	0	scaffold_002.g697.t1	predicted protein
EYC84_004559	13.2818	0	0	0	0	0	scaffold_002.g699.t1	3-ketoacyl-acyl carrier reductase protein
EYC84_004560	0	0	11.9853	0	0	0	scaffold_002.g700.t1	LPS-induced tumor necrosis factor alpha factor protein
EYC84_004562	15.3564	0	0	0	0	0	scaffold_002.g702.t1	predicted protein
EYC84_004565	11.1186	28.3159	28.3439	0	0	0	scaffold_002.g705.t1	endoplasmic oxidoreductin
EYC84_004568	0	11.7042	13.5053	0	0	0	scaffold_002.g708.t1	cyclin-dependent kinase regulatory subunit CKS1
EYC84_004570	15.5358	0	10.3978	0	0	0	scaffold_002.g710.t1	Bromodomain-containing protein-like protein
EYC84_004573	0	10.884	0	0	0	0	scaffold_002.g713.t1	ribosome recycling factor
EYC84_004574	17.6126	30.6472	14.6823	0	0	0	scaffold_002.g714.t1	predicted protein
EYC84_004580	0	15.7789	32.1372	0	0	0	scaffold_002.g720.t1	heavy metal translocatin
EYC84_004582	17.5888	0	13.7063	0	0	0	scaffold_002.g722.t1	DUF155-domain-containing protein
EYC84_004588	17.7488	10.6563	0	0	0	0	scaffold_002.g728.t1	deubiquitination-protection dph1 protein
EYC84_004594	0	23.4807	17.7289	0	0	0	scaffold_002.g734.t1	DUF1713 domain protein
EYC84_004595	22.0795	20.9201	0	0	0	0	scaffold_002.g735.t1	beta-flanking protein
EYC84_004598	0	13.121	24.5487	0	0	0	scaffold_002.g738.t1	palmitoyltransferase pfa4
EYC84_004602	26.4297	18.3029	21.7716	0	0	0	scaffold_002.g742.t1	---NA---
EYC84_004605	0	11.1864	0	0	0	0	scaffold_002.g745.t1	ARM repeat-containing protein
EYC84_004608	35.45	47.3199	30.9924	0	0	0	scaffold_002.g748.t1	---NA---
EYC84_004609	26.7215	42.1936	27.4976	12.7767	0	0	scaffold_002.g749.t1	adenine phosphoribosyltransferase
EYC84_004620	0	12.611	20.4936	0	0	0	scaffold_002.g760.t1	MFS transporter
EYC84_004624	30.916	0	0	0	0	0	scaffold_002.g764.t1	related to transcription factor TFIIA-L
EYC84_004625	13.3272	0	11.2585	0	0	0	scaffold_002.g765.t1	---NA---
EYC84_004627	11.1165	15.516	14.9911	0	0	0	scaffold_002.g767.t1	---NA---
EYC84_004628	15.5142	12.1805	14.9667	0	0	0	scaffold_002.g768.t1	kelch domain-containing protein
EYC84_004630	15.497	13.4614	0	0	0	0	scaffold_002.g770.t1	c-14 sterol reductase protein
EYC84_004633	19.8234	12.789	17.7901	0	0	0	scaffold_002.g773.t1	CDC24 calponin
EYC84_004634	0	0	25.5713	0	0	0	scaffold_002.g774.t1	WD40 repeat-like protein
EYC84_004638	17.8374	24.9862	32.1085	0	0	0	scaffold_002.g778.t1	ribonuclease H-like protein
EYC84_004639	19.8688	0	0	0	0	0	scaffold_002.g779.t1	U6 snRNA-associated Sm-like protein LSm5
EYC84_004643	24.4481	15.5605	12.4947	0	0	0	scaffold_002.g783.t1	predicted protein
EYC84_004645	11.0063	16.3015	13.95	0	0	0	scaffold_002.g785.t1	putative hsp90-like protein
EYC84_004646	15.5358	0	38.4511	0	0	0	scaffold_002.g786.t1	related to endothelin-converting enzyme 1
EYC84_004649	0	13.2058	25.5941	0	0	0	scaffold_002.g789.t1	DIL domain-containing protein
EYC84_004651	0	0	12.9244	0	0	0	scaffold_002.g791.t1	related to CYTOCHROME B561
EYC84_004653	0	0	38.3723	0	0	0	scaffold_002.g793.t1	beta-lactamase/transpeptidase-like protein
EYC84_004658	13.3056	12.8641	30.8462	0	0	0	scaffold_002.g798.t1	DUF250 domain membrane protein
EYC84_004659	13.2624	0	10.1056	0	0	0	scaffold_002.g799.t1	---NA---
EYC84_004669	15.5164	43.2381	32.929	0	0	0	scaffold_002.g809.t1	NADH-cytochrome b5 reductase
EYC84_004672	13.2386	34.3568	36.1295	0	0	0	scaffold_002.g812.t1	ubiquitin-protein ligase sel1
EYC84_004680	28.8631	33.0143	31.3456	0	0	0	scaffold_002.g820.t1	NLI interacting factor-like phosphatase protein
EYC84_004681	11.0495	0	13.3587	0	0	0	scaffold_002.g821.t1	---NA---
EYC84_004683	15.4688	17.0559	35.3567	0	0	0	scaffold_002.g823.t1	plasma membrane phosphatase required for sodium stress response
EYC84_004692	17.7682	0	0	0	0	0	scaffold_002.g832.t1	L domain-like protein
EYC84_004693	0	16.3225	12.5306	0	0	0	scaffold_002.g833.t1	putative NAD(P)H-dependent D-xylose reductase xyl1
EYC84_004696	0	0	11.4634	0	0	0	scaffold_002.g836.t1	glycosyltransferase family 2 protein
EYC84_004703	13.1695	0	16.771	0	0	0	scaffold_002.g843.t1	glutathione oxidoreductase Glr1
EYC84_004704	39.8931	30.337	47.6729	0	0	0	scaffold_002.g844.t1	probable DNA-directed RNA polymerase II largest chain
EYC84_004710	39.6987	44.3607	32.5212	0	0	0	scaffold_002.g850.t1	high mobility group protein
EYC84_004712	11.1186	26.0482	21.9606	0	0	0	scaffold_002.g852.t1	putative nima-interacting protein
EYC84_004713	11.03	0	0	0	0	0	scaffold_002.g853.t1	hypothetical protein DID88_008584
EYC84_004718	0	11.6376	0	0	0	0	scaffold_002.g858.t1	predicted protein
EYC84_004721	15.5142	19.0901	10.7773	0	0	0	scaffold_002.g861.t1	hypothetical protein DID88_008591
EYC84_004722	59.764	69.7391	50.1016	0	0	0	scaffold_002.g862.t1	putative thioredoxin reductase
EYC84_004724	11.0495	0	0	0	0	0	scaffold_002.g864.t1	related to subunit of VP52-54 complex
EYC84_004735	0	14.5466	27.4428	0	0	0	scaffold_002.g875.t1	---NA---
EYC84_004736	0	0	20.1646	0	0	0	scaffold_002.g876.t1	hypothetical protein DID88_008597
EYC84_004738	37.5267	18.7658	29.2815	0	0	0	scaffold_002.g878.t1	26S proteasome regulatory subunit
EYC84_004739	24.1498	10.8566	10.9904	0	0	0	scaffold_002.g879.t1	histone deacetylase RpdA/Rpd3
EYC84_004743	0	11.5135	20.0405	0	0	0	scaffold_002.g883.t1	Zinc/iron permease
[truncated: 2,056 more rows]

## Sheet: Table S3
Table S3: DEGs profiles in peach fruits among three different comparison groups (CHI–CT, MF–CT, CHI_MF–CT) at 12, 24 and 48 HAI; CHI: chitosan treated fruits, MF: Monilinia fructicola inoculated fruits, CHI_MF: chitosan pre-treated and Monilinia fructicola inoculated fruits, CT: untreated - mock inoculated fruits
CHI-CT																								MF-CT																								CHI_MF-CT
12 HAI								24 HAI								48 HAI								12 HAI								24 HAI								48 HAI								12 HAI
Gene ID	log2foldchange	pvalue	padj	Regulation	gene_description	KEGG term	GO term	Gene ID	log2foldchange	pvalue	padj	Regulation	gene_description	KEGG term	GO term	Gene ID	log2foldchange	pvalue	padj	Regulation	gene_description	KEGG term	GO; term	Gene ID	log2foldchange	pvalue	padj	Regulation	gene_description	KEGG term	GO term	Gene ID	log2foldchange	pvalue	padj	Regulation	gene_description	KEGG term	GO term	Gene ID	log2foldchange	pvalue	padj	Regulation	gene_description	KEGG term	GO term	Gene ID	log2foldchange
LOC18779301	7.65775522032553	1.13040778972504e-09	2.69260958661191e-08	UP	stigma-specific STIG1-like protein 1			LOC18780569	9.88338383670363	7.24805447835001e-82	2.57085460841399e-80	UP	uncharacterized LOC18780569			LOC18785238	-8.80410290602988	4.17888521436569e-13	4.07836220233628e-12	DOWN	NAC domain-containing protein 86			LOC18774038	8.75676375441934	6.8535079907476e-13	2.18464778909369e-11	UP	uncharacterized LOC18774038			LOC18770782	9.87397964939218	3.81442997653888e-16	4.41229786270777e-15	UP	ethylene-responsive transcription factor 2		molecular function:DNA-binding transcription factor activity(GO:0003700); molecular function:transcription regulator activity(GO:0140110)	LOC18770127	9.99884233762014	1.19621110512891e-16	9.64286132884502e-16	UP	ethylene-responsive transcription factor 2		molecular function:DNA-binding transcription factor activity(GO:0003700); molecular function:transcription regulator activity(GO:0140110)	LOC18775056	8.47604690584103
LOC18779363	7.08502773800735	1.15000632576156e-15	6.22333110725402e-14	UP	cold and drought-regulated protein CORA			LOC18766656	9.50589419524888	0	0	UP	protein SULFUR DEFICIENCY-INDUCED 1			LOC18793489	-8.36463707078426	3.78596079783255e-12	3.4188008476453e-11	DOWN	uncharacterized ATP-dependent helicase C29A10.10c			LOC18769120	-8.61315218157057	3.33569213755376e-12	9.80693488440804e-11	DOWN	uncharacterized LOC18769120			LOC18772399	9.85490510779457	2.83230479594575e-108	2.83185283241448e-106	UP	probable mannitol dehydrogenase			LOC18767671	9.98061468579601	8.03119996866579e-17	6.51451394425317e-16	UP	pentatricopeptide repeat-containing protein At4g32430, mitochondrial			LOC18774038	7.66525248361511
LOC18787499	6.71599341886315	1.81158687369807e-14	8.47871618698093e-13	UP	protein ECERIFERUM 1	pper00073:Cutin, suberine and wax biosynthesis	biological process:fatty acid biosynthetic process(GO:0006633); biological process:fatty acid metabolic process(GO:0006631); biological process:monocarboxylic acid biosynthetic process(GO:0072330); biological process:lipid biosynthetic process(GO:0008610); biological process:monocarboxylic acid metabolic process(GO:0032787); biological process:cellular lipid metabolic process(GO:0044255); biologi…	LOC18781613	-9.25389009784559	1.7919973407547e-19	1.61124310296195e-18	DOWN	uncharacterized LOC18781613		molecular function:calcium ion binding(GO:0005509)	LOC18783011	-8.30838303768567	1.27788687462928e-36	3.64133651232157e-35	DOWN	transcription initiation factor IIB	pper03022:Basal transcription factors		LOC18792573	8.59724463334685	1.98176586721576e-12	6.08802581695451e-11	UP	lignin-forming anionic peroxidase	pper00940:Phenylpropanoid biosynthesis	biological process:response to stress(GO:0006950); biological process:response to oxidative stress(GO:0006979); molecular function:heme binding(GO:0020037); molecular function:tetrapyrrole binding(GO:0046906); molecular function:cofactor binding(GO:0048037); molecular function:peroxidase activity(GO:0004601); molecular function:oxidoreductase activity, acting on peroxide as acceptor(GO:0016684); …	LOC18774641	9.18993673371983	1.75876599976118e-26	3.17269908805286e-25	UP	secoisolariciresinol dehydrogenase			LOC18786681	9.97727144376966	2.21895595578541e-32	3.00924183534031e-31	UP	pectinesterase 2	pper00040:Pentose and glucuronate interconversions	biological process:cell wall organization or biogenesis(GO:0071554); biological process:cell wall modification(GO:0042545); biological process:external encapsulating structure organization(GO:0045229); biological process:cell wall organization(GO:0071555); biological process:cellular component organization(GO:0016043); biological process:cellular component organization or biogenesis(GO:0071840); …	LOC18774517	6.88881864639433
LOC18778790	-6.47864340855692	8.8377855176375e-09	1.80689411816917e-07	DOWN	uncharacterized LOC18778790			LOC18787422	9.21340753804378	1.02826069485318e-15	7.80482497309835e-15	UP	serine carboxypeptidase-like 40		biological process:proteolysis(GO:0006508); molecular function:serine-type carboxypeptidase activity(GO:0004185); molecular function:carboxypeptidase activity(GO:0004180); molecular function:serine-type exopeptidase activity(GO:0070008); molecular function:serine-type peptidase activity(GO:0008236); molecular function:serine hydrolase activity(GO:0017171); molecular function:exopeptidase activity…	LOC18772304	7.96873691892659	1.5098866610267e-43	5.24001399264664e-42	UP	laccase-7		molecular function:copper ion binding(GO:0005507)	LOC18774580	8.41117319079634	7.74702459503167e-12	2.16660890678975e-10	UP	probable serine/threonine-protein kinase roco5			LOC18767333	9.06132131728885	2.85733579124857e-13	2.81495497212261e-12	UP	protein DMR6-LIKE OXYGENASE 2			LOC18774580	9.9727393687282	1.39636584571282e-72	3.55662594819794e-71	UP	probable serine/threonine-protein kinase roco5			LOC18774580	6.77571447585596
LOC18769374	6.14180192356103	1.31350975276324e-05	0.0001384421691333	UP	myb-related protein 2			LOC18779301	9.03632602604818	1.82962265875601e-19	1.64269826488984e-18	UP	stigma-specific STIG1-like protein 1			LOC18793670	-7.90558262436786	5.1382264737004e-14	5.31605216222555e-13	DOWN	BTB/POZ domain-containing protein At4g08455			LOC18774517	8.09716527365077	7.0768121211705e-11	1.73143407426767e-09	UP	cytochrome P450 94C1		molecular function:iron ion binding(GO:0005506); molecular function:heme binding(GO:0020037); molecular function:tetrapyrrole binding(GO:0046906); molecular function:cofactor binding(GO:0048037); molecular function:oxidoreductase activity, acting on paired donors, with incorporation or reduction of molecular oxygen(GO:0016705)	LOC18786369	8.86666030378733	1.27052396462851e-116	1.46515576460872e-114	UP	cytochrome P450 714C2		molecular function:tetrapyrrole binding(GO:0046906); molecular function:heme binding(GO:0020037); molecular function:oxidoreductase activity, acting on paired donors, with incorporation or reduction of molecular oxygen(GO:0016705); molecular function:iron ion binding(GO:0005506)	LOC18779967	9.9508562245665	1.38164625382049e-16	1.10934299214037e-15	UP	cysteine-rich receptor-like protein kinase 10			LOC18779363	6.70236565943103
LOC18778276	6.09429467209422	1.30266810416746e-05	0.000137466810236855	UP	AT-rich interactive domain-containing protein 4B			LOC18788991	-7.95505498587305	6.58585676542649e-11	3.67331329364909e-10	DOWN	plant cysteine oxidase 1		molecular function:oxidoreductase activity, acting on single donors with incorporation of molecular oxygen(GO:0016701); molecular function:oxidoreductase activity, acting on single donors with incorporation of molecular oxygen, incorporation of two atoms of oxygen(GO:0016702); molecular function:dioxygenase activity(GO:0051213)	LOC18785541	-7.8446565141518	1.79606863478578e-32	4.50073669658083e-31	DOWN	NAC domain-containing protein 86			LOC18775534	8.05573822322562	1.03689866934037e-10	2.48562218754141e-09	UP	uncharacterized LOC18775534			LOC18769119	8.84595823798878	1.1627486119523e-12	1.09664754936615e-11	UP	uncharacterized LOC18769119		biological process:lipid metabolic process(GO:0006629)	LOC18778711	9.94296733849124	3.80289443236015e-62	8.59123455241014e-61	UP	myb-related protein Myb4			LOC18775534	6.49819655013098
LOC18776400	-5.88648239406421	0.000106733793941251	0.000856888785201964	DOWN	dehydration-responsive element-binding protein 1A		molecular function:DNA-binding transcription factor activity(GO:0003700); molecular function:transcription regulator activity(GO:0140110)	LOC18767537	-7.72431695958938	5.14885836776124e-26	5.98146018476472e-25	DOWN	stearoyl-[acyl-carrier-protein] 9-desaturase 6, chloroplastic	pper01040:Biosynthesis of unsaturated fatty acids; pper00061:Fatty acid biosynthesis; pper01212:Fatty acid metabolism	biological process:fatty acid metabolic process(GO:0006631); biological process:lipid metabolic process(GO:0006629); biological process:cellular lipid metabolic process(GO:0044255); biological process:monocarboxylic acid metabolic process(GO:0032787); biological process:small molecule metabolic process(GO:0044281); biological process:oxoacid metabolic process(GO:0043436); biological process:organ…	LOC18772007	7.72579966862395	2.89303644791408e-10	2.19489497205948e-09	UP	uncharacterized LOC18772007			LOC18773071	7.8248919952405	4.13493011868534e-10	9.02429472650995e-09	UP	DNA damage-repair/toleration protein DRT100			LOC18774057	8.82539568286419	2.24614255400825e-24	3.71988912666899e-23	UP	uncharacterized LOC18774057			LOC109947208	9.94258583707594	8.46823576922658e-10	4.64565115231236e-09	UP	extensin-like			LOC18768766	6.43948342210184
LOC18776867	5.88357006006909	2.26492463325904e-13	8.83371618787092e-12	UP	cytochrome P450 86A22	pper00073:Cutin, suberine and wax biosynthesis	molecular function:iron ion binding(GO:0005506); molecular function:cofactor binding(GO:0048037); molecular function:oxidoreductase activity, acting on paired donors, with incorporation or reduction of molecular oxygen(GO:0016705); molecular function:heme binding(GO:0020037); molecular function:tetrapyrrole binding(GO:0046906)	LOC18770210	-7.52667755123536	0	0	DOWN	1-aminocyclopropane-1-carboxylate oxidase 1	pper00270:Cysteine and methionine metabolism		LOC18784790	7.51647588417023	5.87691281990748e-24	1.04861355446307e-22	UP	polygalacturonase	pper00040:Pentose and glucuronate interconversions	biological process:carbohydrate metabolic process(GO:0005975); molecular function:hydrolase activity, acting on glycosyl bonds(GO:0016798); molecular function:hydrolase activity, hydrolyzing O-glycosyl compounds(GO:0004553); molecular function:polygalacturonase activity(GO:0004650)	LOC18768766	7.77638663317084	1.79165919051024e-13	6.02424234812962e-12	UP	allene oxide synthase 1, chloroplastic	pper00592:alpha-Linolenic acid metabolism	molecular function:iron ion binding(GO:0005506); molecular function:heme binding(GO:0020037); molecular function:tetrapyrrole binding(GO:0046906); molecular function:cofactor binding(GO:0048037); molecular function:oxidoreductase activity, acting on paired donors, with incorporation or reduction of molecular oxygen(GO:0016705)	LOC18769528	8.8232557392565	1.87263418809799e-12	1.74084593638367e-11	UP	beta-glucosidase 12		biological process:carbohydrate metabolic process(GO:0005975); molecular function:hydrolase activity, hydrolyzing O-glycosyl compounds(GO:0004553); molecular function:hydrolase activity, acting on glycosyl bonds(GO:0016798)	LOC18774013	9.9264153345619	2.27279444325152e-16	1.8073038804098e-15	UP	beta-glucosidase 12		biological process:carbohydrate metabolic process(GO:0005975); molecular function:hydrolase activity, hydrolyzing O-glycosyl compounds(GO:0004553); molecular function:hydrolase activity, acting on glycosyl bonds(GO:0016798)	LOC18773846	6.2988105138146
LOC18772551	5.87908096049274	4.04532310816403e-05	0.000368311568160234	UP	uncharacterized LOC18772551		molecular function:pattern binding(GO:0001871); molecular function:polysaccharide binding(GO:0030247); molecular function:carbohydrate binding(GO:0030246)	LOC18773241	7.5122626761632	7.45966110771147e-09	3.54224732213217e-08	UP	sulfate transporter 2.1		biological process:sulfate transport(GO:0008272); biological process:sulfur compound transport(GO:0072348); biological process:inorganic anion transport(GO:0015698); biological process:ion transport(GO:0006811); biological process:anion transport(GO:0006820); molecular function:transmembrane transporter activity(GO:0022857); molecular function:sulfate transmembrane transporter activity(GO:0015116…	LOC18787422	-7.27711508415669	1.60299833821565e-08	1.0358396542736e-07	DOWN	serine carboxypeptidase-like 40		biological process:proteolysis(GO:0006508); molecular function:serine-type carboxypeptidase activity(GO:0004185); molecular function:carboxypeptidase activity(GO:0004180); molecular function:exopeptidase activity(GO:0008238); molecular function:serine-type exopeptidase activity(GO:0070008); molecular function:serine-type peptidase activity(GO:0008236); molecular function:serine hydrolase activity…	LOC109947208	7.7621348717831	9.30731108934994e-10	1.94993100525639e-08	UP	extensin-like			LOC18784424	8.65584711446362	4.06498102069964e-24	6.63276460469541e-23	UP	tryptophan synthase alpha chain	pper00400:Phenylalanine, tyrosine and tryptophan biosynthesis; pper00260:Glycine, serine and threonine metabolism; pper01230:Biosynthesis of amino acids	biological process:amine metabolic process(GO:0009308); biological process:cellular biogenic amine metabolic process(GO:0006576); biological process:cellular amine metabolic process(GO:0044106); biological process:alpha-amino acid metabolic process(GO:1901605); biological process:aromatic amino acid family metabolic process(GO:0009072); biological process:cellular amino acid metabolic process(GO:…	LOC18766172	9.92616602616991	1.84966193780508e-16	1.47664407378943e-15	UP	calmodulin-like protein 11	pper04626:Plant-pathogen interaction; pper04016:MAPK signaling pathway - plant; pper04070:Phosphatidylinositol signaling system	molecular function:calcium ion binding(GO:0005509)	LOC18786762	6.27755808397264
LOC18785809	5.82492812183877	1.01233417036077e-13	4.23444222901871e-12	UP	3-ketoacyl-CoA synthase 19	pper04626:Plant-pathogen interaction; pper00062:Fatty acid elongation	biological process:fatty acid biosynthetic process(GO:0006633); biological process:fatty acid metabolic process(GO:0006631); biological process:monocarboxylic acid biosynthetic process(GO:0072330); biological process:lipid biosynthetic process(GO:0008610); biological process:monocarboxylic acid metabolic process(GO:0032787); biological process:cellular lipid metabolic process(GO:0044255); biologi…	LOC18769055	-7.38207351984779	2.24358822853381e-09	1.11207825663537e-08	DOWN	early nodulin-93			LOC18781267	-7.25697576690995	5.91976737688043e-12	5.25379354698138e-11	DOWN	cyclic nucleotide-gated ion channel 4	pper04626:Plant-pathogen interaction	biological process:ion transport(GO:0006811); biological process:transmembrane transport(GO:0055085); molecular function:transporter activity(GO:0005215); molecular function:inorganic molecular entity transmembrane transporter activity(GO:0015318); molecular function:ion transmembrane transporter activity(GO:0015075); molecular function:transmembrane transporter activity(GO:0022857); molecular fu…	LOC18789400	7.28452118906969	6.67312942355107e-19	3.50132604887029e-17	UP	IAA-amino acid hydrolase ILR1-like 1			LOC18768766	8.62046342874089	2.43110577829911e-213	1.20256566617601e-210	UP	allene oxide synthase 1, chloroplastic	pper00592:alpha-Linolenic acid metabolism	molecular function:tetrapyrrole binding(GO:0046906); molecular function:heme binding(GO:0020037); molecular function:oxidoreductase activity, acting on paired donors, with incorporation or reduction of molecular oxygen(GO:0016705); molecular function:iron ion binding(GO:0005506)	LOC18783394	9.91368680304566	1.72781813164922e-16	1.38058438234502e-15	UP	non-functional pseudokinase ZED1			LOC18789438	6.2636162666783
LOC18789438	5.80780176926798	1.1684579970398e-05	0.000124518074675312	UP	3-ketoacyl-CoA synthase 20	pper04626:Plant-pathogen interaction; pper00062:Fatty acid elongation	biological process:fatty acid biosynthetic process(GO:0006633); biological process:fatty acid metabolic process(GO:0006631); biological process:monocarboxylic acid biosynthetic process(GO:0072330); biological process:lipid biosynthetic process(GO:0008610); biological process:monocarboxylic acid metabolic process(GO:0032787); biological process:cellular lipid metabolic process(GO:0044255); biologi…	LOC18770886	7.1698392950305	7.7391554509356e-08	3.35711283999315e-07	UP	O-acyltransferase WSD1		biological process:lipid biosynthetic process(GO:0008610); biological process:lipid metabolic process(GO:0006629); biological process:cellular lipid metabolic process(GO:0044255); biological process:glycerolipid biosynthetic process(GO:0045017); biological process:glycerolipid metabolic process(GO:0046486); molecular function:transferase activity, transferring acyl groups other than amino-acyl gr…	LOC18786620	-7.20562900557861	3.75718471723713e-08	2.3255083923791e-07	DOWN	heavy metal-associated isoprenylated plant protein 3			LOC109946536	7.28403821374572	5.7867709187699e-12	1.65747655929404e-10	UP	VQ motif-containing protein 20-like			LOC18766704	8.44450751204894	1.47003851108444e-11	1.28821976190462e-10	UP	probable F-box protein At4g22030			LOC18779203	9.90086736791757	1.24597084276803e-16	1.00350866902477e-15	UP	probable F-box protein At4g22030			LOC18792573	6.20393317840876
LOC18786762	5.80747123774249	9.81330917628713e-06	0.000106144331671308	UP	probable inactive purple acid phosphatase 27		molecular function:acid phosphatase activity(GO:0003993); molecular function:hydrolase activity, acting on ester bonds(GO:0016788); molecular function:phosphatase activity(GO:0016791); molecular function:phosphoric ester hydrolase activity(GO:0042578)	LOC18780598	-7.08002144208568	5.5795515490044e-09	2.67603324549551e-08	DOWN	epidermis-specific secreted glycoprotein EP1			LOC18784446	-7.09983901746319	4.41696212089169e-83	3.07204222612222e-81	DOWN	endoribonuclease Dicer homolog 2		biological process:RNA processing(GO:0006396); molecular function:ribonuclease activity(GO:0004540); molecular function:endoribonuclease activity(GO:0004521); molecular function:endonuclease activity(GO:0004519); molecular function:ribonuclease III activity(GO:0004525); molecular function:double-stranded RNA-specific ribonuclease activity(GO:0032296); molecular function:catalytic activity, acting…	LOC109949353	6.89472485356329	1.37224154325384e-37	1.98439514876878e-35	UP	uncharacterized LOC109949353			LOC18782145	8.4360661732241	2.66180102841688e-66	1.29286495946129e-64	UP	peroxidase P7	pper00940:Phenylpropanoid biosynthesis	biological process:response to stress(GO:0006950); biological process:response to oxidative stress(GO:0006979); molecular function:tetrapyrrole binding(GO:0046906); molecular function:heme binding(GO:0020037); molecular function:peroxidase activity(GO:0004601); molecular function:oxidoreductase activity, acting on peroxide as acceptor(GO:0016684); molecular function:antioxidant activity(GO:001620…	LOC18767901	9.90056337931036	1.46247236682878e-80	4.04817693503016e-79	UP	ethylene-responsive transcription factor 1B	pper04016:MAPK signaling pathway - plant; pper04075:Plant hormone signal transduction	molecular function:DNA-binding transcription factor activity(GO:0003700); molecular function:transcription regulator activity(GO:0140110)	LOC18767656	-6.17810847355374
LOC18793838	5.78352795953867	1.17834721002062e-05	0.000125417569981113	UP	signal peptidase complex-like protein DTM1		biological process:protein processing(GO:0016485); biological process:protein maturation(GO:0051604); biological process:proteolysis(GO:0006508); biological process:cellular amide metabolic process(GO:0043603); biological process:peptide metabolic process(GO:0006518); cellular component:peptidase complex(GO:1905368); cellular component:endoplasmic reticulum membrane(GO:0005789); cellular componen…	LOC18789997	-6.97242198771001	2.69815914181921e-08	1.2212410264173e-07	DOWN	basic 7S globulin 2			PrpeC_p025	-7.04634906084479	0.00016886462296697	0.000635818346125022	DOWN		pper00190:Oxidative phosphorylation	molecular function:cofactor binding(GO:0048037); molecular function:iron-sulfur cluster binding(GO:0051536); molecular function:metal cluster binding(GO:0051540)	LOC18791324	6.84956227036089	3.37509067831468e-07	4.56522721636374e-06	UP	uncharacterized LOC18791324			LOC18786860	8.39105951497569	1.23519633944673e-20	1.75760678217867e-19	UP	protein RDM1		biological process:macromolecule methylation(GO:0043414); biological process:methylation(GO:0032259); biological process:DNA metabolic process(GO:0006259); cellular component:nucleus(GO:0005634)	LOC18771943	9.89484083510232	1.32932898212403e-60	2.92677686064258e-59	UP	GRF1-interacting factor 1			LOC18789496	6.0887751245873
LOC18771640	5.68012732124656	0.000131847688302786	0.00102939874586986	UP	GDSL esterase/lipase EXL3		molecular function:hydrolase activity, acting on ester bonds(GO:0016788)	LOC18792251	6.94565979349276	5.69591810844717e-07	2.26779223536703e-06	UP	transcription factor HY5-like	pper04712:Circadian rhythm - plant	molecular function:DNA-binding transcription factor activity(GO:0003700); molecular function:transcription regulator activity(GO:0140110); molecular function:sequence-specific DNA binding(GO:0043565)	LOC18787361	-6.94541604665666	5.91132420393384e-25	1.09607143019622e-23	DOWN	NAC domain-containing protein 67			LOC18771075	6.84293978545186	5.35229507429363e-08	8.4279036240593e-07	UP	putative transcription factor bHLH041		molecular function:protein dimerization activity(GO:0046983)	LOC18770127	8.38967783331141	1.14729029239378e-22	1.78819366717462e-21	UP	ethylene-responsive transcription factor 2		molecular function:DNA-binding transcription factor activity(GO:0003700); molecular function:transcription regulator activity(GO:0140110)	LOC18773360	9.88545134071356	2.4399469730671e-16	1.93598933910114e-15	UP	short-chain dehydrogenase reductase 2a			LOC18772575	5.99642301372593
LOC18780076	5.6633729845627	0.00011148449794744	0.000888847629353509	UP	uncharacterized protein PHLOEM PROTEIN 2-LIKE A4			LOC18768619	6.92844086879139	5.27706179402968e-73	1.68010481043024e-71	UP	probable 2-oxoglutarate-dependent dioxygenase At5g05600			PrpeC_p022	-6.78912442133946	1.88950026991301e-05	8.32463983659082e-05	DOWN				LOC18786762	6.79362848161736	6.13182250942799e-08	9.53380480552409e-07	UP	probable inactive purple acid phosphatase 27		molecular function:acid phosphatase activity(GO:0003993); molecular function:hydrolase activity, acting on ester bonds(GO:0016788); molecular function:phosphatase activity(GO:0016791); molecular function:phosphoric ester hydrolase activity(GO:0042578)	LOC109948885	8.30096856412747	6.10426475120899e-11	5.0996384234878e-10	UP	uncharacterized LOC109948885			LOC18776084	9.88505486791162	3.27260571572565e-61	7.24034155063098e-60	UP	caffeic acid 3-O-methyltransferase	pper00940:Phenylpropanoid biosynthesis; pper00380:Tryptophan metabolism	molecular function:O-methyltransferase activity(GO:0008171); molecular function:protein dimerization activity(GO:0046983); molecular function:transferase activity, transferring one-carbon groups(GO:0016741); molecular function:methyltransferase activity(GO:0008168)	LOC109947208	5.94961199071309
LOC18781225	5.56559522005224	0.000228658086551598	0.00164165509320648	UP	MDIS1-interacting receptor like kinase 2			LOC18792278	6.85621289599938	1.30036921185607e-10	7.09800713446423e-10	UP	galactinol synthase 2	pper00052:Galactose metabolism	molecular function:transferase activity, transferring glycosyl groups(GO:0016757)	LOC109947178	-6.766101946715	8.5990088751153e-167	1.4951746044078e-164	DOWN	NAC domain-containing protein 100-like			LOC18786787	6.76365685468298	3.51156027724168e-07	4.72824546943965e-06	UP	hydroxyproline O-galactosyltransferase GALT3			LOC18791463	8.26331049083523	6.42634981960444e-33	1.44320307716971e-31	UP	nudix hydrolase 1			LOC18785098	9.88487709488997	7.54064868918595e-22	7.55560534774301e-21	UP	UDP-glycosyltransferase 76F1		molecular function:transferase activity, transferring hexosyl groups(GO:0016758); molecular function:transferase activity, transferring glycosyl groups(GO:0016757)	LOC18772551	5.87321282646581
LOC18792023	5.46798204896341	0.000357843636896519	0.00242061650786602	UP	receptor protein kinase CLAVATA1			LOC18792266	6.75223423119567	1.24009214284442e-06	4.78222387537172e-06	UP	photosynthetic NDH subunit of lumenal location 2, chloroplastic	pper00195:Photosynthesis	biological process:photosynthesis(GO:0015979); cellular component:photosynthetic membrane(GO:0034357); cellular component:photosystem(GO:0009521); cellular component:thylakoid(GO:0009579); cellular component:thylakoid part(GO:0044436); cellular component:photosystem II(GO:0009523); cellular component:thylakoid membrane(GO:0042651); cellular component:membrane protein complex(GO:0098796); cellular…	PrpeC_p017	-6.7542416452569	2.21002258942473e-06	1.10696016824801e-05	DOWN		pper00195:Photosynthesis	biological process:photosynthesis(GO:0015979); biological process:photosynthesis, light reaction(GO:0019684); biological process:electron transport chain(GO:0022900); biological process:generation of precursor metabolites and energy(GO:0006091); cellular component:photosynthetic membrane(GO:0034357); cellular component:photosystem(GO:0009521); cellular component:thylakoid(GO:0009579); cellular co…	LOC18769382	6.74260961153436	6.08375380705659e-23	4.26030429000455e-21	UP	polygalacturonase-like	pper00040:Pentose and glucuronate interconversions	biological process:carbohydrate metabolic process(GO:0005975); molecular function:hydrolase activity, acting on glycosyl bonds(GO:0016798); molecular function:hydrolase activity, hydrolyzing O-glycosyl compounds(GO:0004553); molecular function:polygalacturonase activity(GO:0004650)	LOC18785947	8.25512148526233	1.74027764715234e-12	1.62261899471838e-11	UP	probable carboxylesterase 15			LOC18782260	9.881867846888	2.22651219006732e-16	1.77127518322678e-15	UP	uncharacterized LOC18782260			LOC18787499	5.86100302171755
LOC18773195	5.45083953126292	5.06971190136338e-05	0.000447919392836274	UP	ADP-ribosylation factor 1	pper04144:Endocytosis	molecular function:purine nucleoside binding(GO:0001883); molecular function:GTP binding(GO:0005525); molecular function:ribonucleoside binding(GO:0032549); molecular function:purine ribonucleoside binding(GO:0032550); molecular function:guanyl ribonucleotide binding(GO:0032561); molecular function:nucleoside binding(GO:0001882); molecular function:guanyl nucleotide binding(GO:0019001)	LOC18788873	-6.73528297577921	1.30874551457896e-10	7.1395511887426e-10	DOWN	probable pectate lyase 5	pper00040:Pentose and glucuronate interconversions		LOC109949006	-6.67047603910364	5.79943467315281e-10	4.31162158946439e-09	DOWN	monothiol glutaredoxin-S17-like		biological process:regulation of biological quality(GO:0065008); biological process:cellular homeostasis(GO:0019725); biological process:homeostatic process(GO:0042592); biological process:cell redox homeostasis(GO:0045454); molecular function:electron transfer activity(GO:0009055); molecular function:protein disulfide oxidoreductase activity(GO:0015035); molecular function:oxidoreductase activit…	LOC18778276	6.71697027555012	1.38006044893855e-06	1.66421255628949e-05	UP	AT-rich interactive domain-containing protein 4B			LOC18771464	8.21686227517983	2.29570095789824e-10	1.84253324380428e-09	UP	dehydration-responsive element-binding protein 1F		molecular function:DNA-binding transcription factor activity(GO:0003700); molecular function:transcription regulator activity(GO:0140110)	LOC18775056	9.85488514534352	9.124211646872e-299	9.59149786185053e-297	UP	probable linoleate 9S-lipoxygenase 5	pper00591:Linoleic acid metabolism	molecular function:oxidoreductase activity, acting on single donors with incorporation of molecular oxygen(GO:0016701); molecular function:oxidoreductase activity, acting on single donors with incorporation of molecular oxygen, incorporation of two atoms of oxygen(GO:0016702); molecular function:dioxygenase activity(GO:0051213)	LOC18776867	5.84434131762214
LOC18786749	5.43256060125384	6.96559973201524e-05	0.00059420340176999	UP	cytochrome P450 86A8	pper00073:Cutin, suberine and wax biosynthesis	molecular function:iron ion binding(GO:0005506); molecular function:cofactor binding(GO:0048037); molecular function:oxidoreductase activity, acting on paired donors, with incorporation or reduction of molecular oxygen(GO:0016705); molecular function:heme binding(GO:0020037); molecular function:tetrapyrrole binding(GO:0046906)	LOC18778496	-6.71742749185487	4.37652305287924e-24	4.73075264180579e-23	DOWN	probable cysteine desulfurase			LOC18778131	6.62324943067643	1.0614694060856e-06	5.53979745166879e-06	UP	L-type lectin-domain containing receptor kinase IX.1		molecular function:carbohydrate binding(GO:0030246)	LOC18779467	6.67611158874921	6.40706226867715e-07	8.2105487444496e-06	UP	uncharacterized LOC18779467			LOC18770766	8.21488077667868	3.61548016215538e-20	5.06787327427552e-19	UP	protein DMR6-LIKE OXYGENASE 1			LOC18781245	9.85224628740825	1.49621941821936e-16	1.20027553329234e-15	UP	wall-associated receptor kinase 1		molecular function:carbohydrate binding(GO:0030246); molecular function:pattern binding(GO:0001871); molecular function:polysaccharide binding(GO:0030247); molecular function:calcium ion binding(GO:0005509)	LOC18769427	5.82842370543944
LOC18773589	5.37596743970556	0.000540414962457712	0.00342797285893048	UP	non-specific lipid-transfer protein 1			LOC18784452	6.67391944708984	4.53330050867967e-06	1.63846934502977e-05	UP	cellulose synthase-like protein H1		biological process:cellular carbohydrate metabolic process(GO:0044262); biological process:cellular glucan metabolic process(GO:0006073); biological process:glucan metabolic process(GO:0044042); biological process:cellular polysaccharide metabolic process(GO:0044264); biological process:polysaccharide metabolic process(GO:0005976); biological process:cellulose metabolic process(GO:0030243); biolo…	PrpeC_p020	-6.54227345216546	3.67624407787027e-07	2.03453066212762e-06	DOWN		pper00195:Photosynthesis	biological process:photosynthesis(GO:0015979); cellular component:photosynthetic membrane(GO:0034357); cellular component:photosystem(GO:0009521); cellular component:thylakoid(GO:0009579); cellular component:thylakoid part(GO:0044436); cellular component:photosystem I(GO:0009522); cellular component:membrane protein complex(GO:0098796)	LOC18776254	-6.59225349136906	1.75921807544816e-06	2.07776971500641e-05	DOWN	expansin-like B1			LOC18790534	8.18767283134277	1.51068719774135e-231	9.79185767446351e-229	UP	transcription factor bHLH92		molecular function:protein dimerization activity(GO:0046983)	LOC18776594	9.83843193253644	3.51864300824833e-155	1.73414747284564e-153	UP	U-box domain-containing protein 21		biological process:protein ubiquitination(GO:0016567); biological process:protein modification by small protein conjugation(GO:0032446); biological process:protein modification by small protein conjugation or removal(GO:0070647); molecular function:ubiquitin-protein transferase activity(GO:0004842); molecular function:ubiquitin-like protein transferase activity(GO:0019787)	LOC18785809	5.82322106278968
LOC18767870	5.35605084944052	0.00055833406669862	0.00352356816072157	UP	putative indole-3-acetic acid-amido synthetase GH3.9	pper04075:Plant hormone signal transduction		LOC18766898	-6.66176527377911	6.39274919763274e-41	1.0962272222448e-39	DOWN	TMV resistance protein N		molecular function:ADP binding(GO:0043531)	LOC18783390	6.53256213124539	2.05578630037204e-06	1.0342662698063e-05	UP	glycerol-3-phosphate acyltransferase 1	pper00561:Glycerolipid metabolism; pper00564:Glycerophospholipid metabolism	molecular function:transferase activity, transferring acyl groups(GO:0016746)	LOC18789496	6.58070675245886	9.83659606291691e-07	1.22523483313097e-05	UP	UDP-glucuronic acid decarboxylase 4	pper00520:Amino sugar and nucleotide sugar metabolism; pper01250:Biosynthesis of nucleotide sugars		LOC18785801	7.99963684214036	7.19974778152287e-10	5.52607836052615e-09	UP	protein LIM1			LOC18782234	9.83422456300869	3.04614612874751e-31	4.02596028324145e-30	UP	GDSL esterase/lipase 2		molecular function:hydrolase activity, acting on ester bonds(GO:0016788)	LOC18769374	5.80567042334251
LOC18766527	-5.30642695403719	7.00844419223741e-06	7.87063735907751e-05	DOWN	transcription factor bHLH113			LOC18786707	6.63139091707681	3.48472890211905e-06	1.28158066483018e-05	UP	S-type anion channel SLAH2		biological process:transmembrane transport(GO:0055085)	LOC18772506	-6.532335721486	0	0	DOWN	protein psi1		biological process:protein folding(GO:0006457); molecular function:unfolded protein binding(GO:0051082)	LOC18774237	6.56742626637991	2.16900409540077e-07	3.06191078134076e-06	UP	uncharacterized LOC18774237			LOC18778977	7.98986775236576	6.08437654925584e-10	4.70844075736361e-09	UP	endoglucanase 11		biological process:carbohydrate metabolic process(GO:0005975); molecular function:hydrolase activity, hydrolyzing O-glycosyl compounds(GO:0004553); molecular function:hydrolase activity, acting on glycosyl bonds(GO:0016798)	LOC18774039	9.83047980314241	1.19596256949403e-80	3.31551452573452e-79	UP	cytochrome P450 714C2		molecular function:oxidoreductase activity, acting on paired donors, with incorporation or reduction of molecular oxygen(GO:0016705); molecular function:heme binding(GO:0020037); molecular function:tetrapyrrole binding(GO:0046906); molecular function:iron ion binding(GO:0005506)	LOC18771640	5.75612264238926
LOC18772575	5.2908440671305	0.000648235006983359	0.00399768006265343	UP	omega-hydroxypalmitate O-feruloyl transferase	pper00940:Phenylpropanoid biosynthesis; pper00945:Stilbenoid, diarylheptanoid and gingerol biosynthesis; pper00941:Flavonoid biosynthesis	molecular function:transferase activity, transferring acyl groups other than amino-acyl groups(GO:0016747); molecular function:transferase activity, transferring acyl groups(GO:0016746)	LOC109947217	6.59757464294421	2.12530172572406e-06	7.98786347639682e-06	UP	uncharacterized LOC109947217			LOC18784130	-6.51566519284076	3.85431899489224e-07	2.12893340917225e-06	DOWN	mitogen-activated protein kinase kinase kinase 1			LOC18787730	-6.52468363848357	4.84560815107016e-09	9.227926357932e-08	DOWN	putative expansin-B2			LOC18789443	7.98811881395891	8.50520053915998e-39	2.2904334460543e-37	UP	patatin-like protein 2		biological process:lipid metabolic process(GO:0006629)	LOC18780496	9.81771361457244	0	0	UP	beta-amyrin 28-oxidase		molecular function:oxidoreductase activity, acting on paired donors, with incorporation or reduction of molecular oxygen(GO:0016705); molecular function:heme binding(GO:0020037); molecular function:tetrapyrrole binding(GO:0046906); molecular function:iron ion binding(GO:0005506)	LOC18791324	5.75433410304624
LOC18782814	5.26037210986543	0.000628077709054747	0.00389958399044536	UP	uncharacterized LOC18782814			LOC18787499	6.59652480286162	3.71284194750199e-13	2.42883913795738e-12	UP	protein ECERIFERUM 1	pper00073:Cutin, suberine and wax biosynthesis	biological process:fatty acid biosynthetic process(GO:0006633); biological process:fatty acid metabolic process(GO:0006631); biological process:lipid biosynthetic process(GO:0008610); biological process:lipid metabolic process(GO:0006629); biological process:cellular lipid metabolic process(GO:0044255); biological process:monocarboxylic acid metabolic process(GO:0032787); biological process:monoc…	PrpeC_p029	-6.48659353063891	1.53868734806263e-07	8.86383786713565e-07	DOWN		pper00630:Glyoxylate and dicarboxylate metabolism; pper00710:Carbon fixation in photosynthetic organisms; pper01200:Carbon metabolism	molecular function:lyase activity(GO:0016829); molecular function:carbon-carbon lyase activity(GO:0016830); molecular function:carboxy-lyase activity(GO:0016831); molecular function:magnesium ion binding(GO:0000287)	LOC18771088	-6.46172733983873	4.08932366507909e-06	4.48438964431331e-05	DOWN	TMV resistance protein N		biological process:cell communication(GO:0007154); biological process:signal transduction(GO:0007165); biological process:signaling(GO:0023052); biological process:cellular response to stimulus(GO:0051716); molecular function:ADP binding(GO:0043531)	LOC18770965	7.9146226072357	1.10106662646773e-09	8.34546345875563e-09	UP	probable inactive serine/threonine-protein kinase fnkC			LOC18785636	9.80656691562339	2.15667602111671e-52	4.20378457878118e-51	UP	probable WRKY transcription factor 53		molecular function:DNA-binding transcription factor activity(GO:0003700); molecular function:transcription regulator activity(GO:0140110); molecular function:sequence-specific DNA binding(GO:0043565)	LOC18771075	5.70820998742657
LOC18771903	5.25837894337576	0.000945304861423493	0.00545479649625812	UP	uncharacterized LOC18771903			LOC18790943	-6.56490385205019	1.47598475232854e-07	6.2273739312966e-07	DOWN	patatin-like protein 2		biological process:lipid metabolic process(GO:0006629)	LOC18781898	6.46078552165046	1.14902731176181e-28	2.47527501800521e-27	UP	thaumatin-like protein 1			LOC18778885	6.44535000924889	2.28419899967975e-06	2.62801084135211e-05	UP	probable F-box protein At4g22030			LOC18775762	7.89170455827746	0	0	UP	1-aminocyclopropane-1-carboxylate synthase	pper04016:MAPK signaling pathway - plant; pper00270:Cysteine and methionine metabolism	molecular function:coenzyme binding(GO:0050662); molecular function:vitamin binding(GO:0019842); molecular function:pyridoxal phosphate binding(GO:0030170); molecular function:vitamin B6 binding(GO:0070279)	LOC18793411	9.8039889497043	1.14228630960412e-221	8.83983779849384e-220	UP	major allergen Pru ar 1		biological process:response to biotic stimulus(GO:0009607); biological process:defense response(GO:0006952); biological process:response to stress(GO:0006950)	LOC18773071	5.70065126163676
LOC18786238	5.2239188037703	3.40149219803917e-16	2.01036315335987e-14	UP	3-ketoacyl-CoA synthase 19	pper04626:Plant-pathogen interaction; pper00062:Fatty acid elongation	biological process:fatty acid biosynthetic process(GO:0006633); biological process:fatty acid metabolic process(GO:0006631); biological process:monocarboxylic acid biosynthetic process(GO:0072330); biological process:lipid biosynthetic process(GO:0008610); biological process:monocarboxylic acid metabolic process(GO:0032787); biological process:cellular lipid metabolic process(GO:0044255); biologi…	LOC109949800	6.53641568863235	3.07974248087208e-06	1.13869907779688e-05	UP	7-deoxyloganetin glucosyltransferase-like		molecular function:transferase activity, transferring hexosyl groups(GO:0016758); molecular function:transferase activity, transferring glycosyl groups(GO:0016757)	LOC18786135	6.44593672832874	4.43213665642304e-06	2.13042619535821e-05	UP	desiccation protectant protein Lea14 homolog			LOC18767894	6.38204812233924	4.00182385892905e-20	2.3035741417078e-18	UP	ethylene-responsive transcription factor ERF098		molecular function:DNA-binding transcription factor activity(GO:0003700); molecular function:transcription regulator activity(GO:0140110)	LOC18767680	7.87356729307741	8.642506004371e-36	2.14318186496256e-34	UP	phospholipase A1-Igamma1, chloroplastic		biological process:lipid metabolic process(GO:0006629)	LOC18793860	9.79080094859277	5.91889773518923e-16	4.61384801595162e-15	UP	glucan endo-1,3-beta-glucosidase, basic vacuolar isoform		biological process:carbohydrate metabolic process(GO:0005975); molecular function:hydrolase activity, hydrolyzing O-glycosyl compounds(GO:0004553); molecular function:hydrolase activity, acting on glycosyl bonds(GO:0016798)	LOC18788933	-5.69424629295894
LOC18769427	5.20881844247861	0.00020002457829197	0.0014671010683109	UP	receptor-like protein 12			LOC109948413	6.4624995743529	3.03415842523929e-07	1.24770319020695e-06	UP	wall-associated receptor kinase 2-like		molecular function:carbohydrate binding(GO:0030246); molecular function:pattern binding(GO:0001871); molecular function:polysaccharide binding(GO:0030247)	LOC18782522	6.43921823831761	4.90890233012709e-84	3.48532065439023e-82	UP	thaumatin-like protein 1			LOC18786681	6.37159519987663	7.16468330296226e-07	9.11575264018525e-06	UP	pectinesterase 2	pper00040:Pentose and glucuronate interconversions	biological process:cell wall organization or biogenesis(GO:0071554); biological process:cell wall modification(GO:0042545); biological process:external encapsulating structure organization(GO:0045229); biological process:cell wall organization(GO:0071555); biological process:cellular component organization(GO:0016043); biological process:cellular component organization or biogenesis(GO:0071840); …	LOC18767425	7.83738870518352	1.55896885783164e-172	4.72644155171956e-170	UP	mitochondrial uncoupling protein 4			LOC18780556	9.78759191623971	8.41571696605264e-16	6.49610478542586e-15	UP	uncharacterized LOC18780556		biological process:microtubule-based process(GO:0007017); cellular component:microtubule associated complex(GO:0005875); cellular component:microtubule cytoskeleton(GO:0015630); cellular component:cytoskeletal part(GO:0044430); cellular component:cytoskeleton(GO:0005856); cellular component:non-membrane-bounded organelle(GO:0043228); cellular component:intracellular non-membrane-bounded organelle…	LOC18786787	5.57131560355904
LOC18781714	5.09305302064567	0.00136690990247674	0.00739480749178059	UP	mitochondrial pyruvate carrier 4		biological process:ion transport(GO:0006811); biological process:anion transport(GO:0006820); biological process:mitochondrial transport(GO:0006839); biological process:transmembrane transport(GO:0055085); biological process:anion transmembrane transport(GO:0098656); biological process:organic acid transmembrane transport(GO:1903825); biological process:carboxylic acid transmembrane transport(GO:…	LOC18779184	-6.46184562993916	4.70702903138796e-07	1.89224392670987e-06	DOWN	probable leucine-rich repeat receptor-like protein kinase At1g35710			LOC18792278	-6.3959822862472	2.7915948352427e-06	1.38120720071242e-05	DOWN	galactinol synthase 2	pper00052:Galactose metabolism	molecular function:transferase activity, transferring glycosyl groups(GO:0016757)	LOC18782814	6.32781125381629	8.35924256557103e-06	8.49633414364639e-05	UP	uncharacterized LOC18782814			LOC18771055	7.83485195306347	1.12646389742164e-09	8.52421170685768e-09	UP	ethylene-responsive transcription factor 1A		molecular function:DNA-binding transcription factor activity(GO:0003700); molecular function:transcription regulator activity(GO:0140110)	LOC18778885	9.77850378750637	2.60213506326833e-21	2.55520670953552e-20	UP	probable F-box protein At4g22030			LOC18778276	5.46655123295935
PrpeC_t002	-5.08929195387457	0.000990886735479724	0.00565563137715965	DOWN				LOC18781795	6.45417632298892	2.09261094874073e-05	7.00176514896984e-05	UP	homeobox-leucine zipper protein HDG2		molecular function:lipid binding(GO:0008289)	LOC18779920	6.30114916520806	1.61224519263622e-05	7.17676543430544e-05	UP	E3 ubiquitin-protein ligase ATL41			LOC18772575	6.26716249071843	6.84756685406999e-06	7.09363259367169e-05	UP	omega-hydroxypalmitate O-feruloyl transferase	pper00940:Phenylpropanoid biosynthesis; pper00941:Flavonoid biosynthesis; pper00945:Stilbenoid, diarylheptanoid and gingerol biosynthesis	molecular function:transferase activity, transferring acyl groups other than amino-acyl groups(GO:0016747); molecular function:transferase activity, transferring acyl groups(GO:0016746)	LOC18777592	7.8295643156763	1.80480216342016e-09	1.34249569710363e-08	UP	uncharacterized LOC18777592			LOC18767512	9.7607207273615	8.11297434589394e-116	3.06104878536156e-114	UP	uncharacterized LOC18767512			LOC109946536	5.42179519104644
LOC18787311	5.04505580248536	2.05452611187872e-13	8.1043801092036e-12	UP	cytochrome P450 77A3	pper00073:Cutin, suberine and wax biosynthesis	molecular function:iron ion binding(GO:0005506); molecular function:cofactor binding(GO:0048037); molecular function:oxidoreductase activity, acting on paired donors, with incorporation or reduction of molecular oxygen(GO:0016705); molecular function:heme binding(GO:0020037); molecular function:tetrapyrrole binding(GO:0046906)	LOC18785809	6.45276218939612	1.07792225975082e-12	6.84506317228422e-12	UP	3-ketoacyl-CoA synthase 19	pper00062:Fatty acid elongation; pper04626:Plant-pathogen interaction	biological process:fatty acid biosynthetic process(GO:0006633); biological process:fatty acid metabolic process(GO:0006631); biological process:lipid biosynthetic process(GO:0008610); biological process:lipid metabolic process(GO:0006629); biological process:cellular lipid metabolic process(GO:0044255); biological process:monocarboxylic acid metabolic process(GO:0032787); biological process:monoc…	PrpeC_p026	-6.20872253543292	1.60692031896739e-05	7.15680142059706e-05	DOWN		pper00190:Oxidative phosphorylation	molecular function:oxidoreductase activity, acting on NAD(P)H(GO:0016651); molecular function:oxidoreductase activity, acting on NAD(P)H, quinone or similar compound as acceptor(GO:0016655)	LOC18788654	-6.26707840594762	1.97233749296705e-06	2.29594024786682e-05	DOWN	protein DETOXIFICATION 55		biological process:transmembrane transport(GO:0055085); biological process:drug transmembrane transport(GO:0006855); biological process:drug transport(GO:0015893); biological process:response to drug(GO:0042493); biological process:response to chemical(GO:0042221); molecular function:transporter activity(GO:0005215); molecular function:transmembrane transporter activity(GO:0022857); molecular fun…	LOC18775056	7.76945324160319	3.22887386398537e-286	4.66870323241023e-283	UP	probable linoleate 9S-lipoxygenase 5	pper00591:Linoleic acid metabolism	molecular function:oxidoreductase activity, acting on single donors with incorporation of molecular oxygen, incorporation of two atoms of oxygen(GO:0016702); molecular function:dioxygenase activity(GO:0051213); molecular function:oxidoreductase activity, acting on single donors with incorporation of molecular oxygen(GO:0016701)	LOC109949353	9.74512505088889	3.67319321770361e-21	3.57222951107796e-20	UP	uncharacterized LOC109949353			LOC18793838	5.40943270900809
LOC18767703	5.0318389505194	0.000308257211870119	0.00212250104888861	UP	trihelix transcription factor GT-2			LOC18789915	-6.4171271232578	9.5465640421834e-07	3.72070702600827e-06	DOWN	ABC transporter B family member 11	pper02010:ABC transporters	biological process:transmembrane transport(GO:0055085); molecular function:transmembrane transporter activity(GO:0022857); molecular function:transporter activity(GO:0005215); molecular function:ATPase activity(GO:0016887); molecular function:nucleoside-triphosphatase activity(GO:0017111); molecular function:ATPase activity, coupled to transmembrane movement of substances(GO:0042626); molecular f…	LOC18766319	6.19581192471903	0	0	UP	pleiotropic drug resistance protein 1	pper02010:ABC transporters	molecular function:ATPase activity(GO:0016887); molecular function:nucleoside-triphosphatase activity(GO:0017111); molecular function:pyrophosphatase activity(GO:0016462); molecular function:hydrolase activity, acting on acid anhydrides, in phosphorus-containing anhydrides(GO:0016818); molecular function:hydrolase activity, acting on acid anhydrides(GO:0016817)	LOC18767671	6.25971441493955	7.14686101404498e-06	7.38218448645865e-05	UP	pentatricopeptide repeat-containing protein At4g32430, mitochondrial			LOC18770925	7.72057211009659	2.36177192946848e-09	1.73958569585497e-08	UP	cytokinin dehydrogenase 3	pper00908:Zeatin biosynthesis	biological process:amine metabolic process(GO:0009308); biological process:regulation of biological quality(GO:0065008); molecular function:coenzyme binding(GO:0050662); molecular function:flavin adenine dinucleotide binding(GO:0050660); molecular function:oxidoreductase activity, acting on CH-OH group of donors(GO:0016614); molecular function:oxidoreductase activity, acting on the CH-NH group of…	LOC18779799	9.7389150818195	1.07067997816802e-96	3.45850552095267e-95	UP	ankyrin repeat-containing protein ITN1			LOC18766527	-5.39585974727027
LOC18773395	5.00684397444819	0.00033688906546149	0.00229320280919678	UP	probable LRR receptor-like serine/threonine-protein kinase At1g06840			LOC18782466	-6.40343207579826	1.77974965954201e-164	1.66858238181283e-162	DOWN	polygalacturonase At1g48100	pper00040:Pentose and glucuronate interconversions	biological process:carbohydrate metabolic process(GO:0005975); molecular function:hydrolase activity, acting on glycosyl bonds(GO:0016798); molecular function:hydrolase activity, hydrolyzing O-glycosyl compounds(GO:0004553); molecular function:polygalacturonase activity(GO:0004650)	LOC18766656	-6.19338320286336	3.75292863957266e-12	3.39076903596596e-11	DOWN	protein SULFUR DEFICIENCY-INDUCED 1			LOC18783490	-6.19522075330891	2.35840385227518e-08	4.01041389296546e-07	DOWN	uncharacterized LOC18783490			LOC18770130	7.71248869084838	2.48909624609603e-09	1.83264951578015e-08	UP	fasciclin-like arabinogalactan protein 13			LOC18791980	9.72343150051456	4.2861135885324e-16	3.35979576383837e-15	UP	cytochrome P450 CYP749A22		molecular function:oxidoreductase activity, acting on paired donors, with incorporation or reduction of molecular oxygen(GO:0016705); molecular function:heme binding(GO:0020037); molecular function:tetrapyrrole binding(GO:0046906); molecular function:iron ion binding(GO:0005506)	LOC18789400	5.33016010298474
PrpeC_t019	-4.99755128960991	0.000632883760730286	0.00391835827120713	DOWN				LOC18772697	6.35835665732669	9.98312094856292e-06	3.47490834957721e-05	UP	late embryogenesis abundant protein 1			PrpeC_p051	-6.19267833567017	0.00196757446130549	0.00595514543883579	DOWN		pper00195:Photosynthesis	biological process:photosynthesis(GO:0015979); biological process:regulation of biological quality(GO:0065008); cellular component:photosynthetic membrane(GO:0034357); cellular component:photosystem(GO:0009521); cellular component:thylakoid(GO:0009579); cellular component:thylakoid part(GO:0044436); cellular component:membrane protein complex(GO:0098796); cellular component:photosystem II(GO:0009…	LOC18790943	6.15060481288962	3.04176278533246e-08	5.03760099280339e-07	UP	patatin-like protein 2		biological process:lipid metabolic process(GO:0006629)	LOC18788991	-7.70490354541905	2.78778570408564e-10	2.22513833884067e-09	DOWN	plant cysteine oxidase 1		molecular function:oxidoreductase activity, acting on single donors with incorporation of molecular oxygen, incorporation of two atoms of oxygen(GO:0016702); molecular function:dioxygenase activity(GO:0051213); molecular function:oxidoreductase activity, acting on single donors with incorporation of molecular oxygen(GO:0016701)	LOC18792078	9.71421181934109	0	0	UP	uncharacterized LOC18792078			LOC18771903	5.30041998904835
LOC18786368	-4.98185331843742	0.00517674539043343	0.0221402074403891	DOWN	zinc finger A20 and AN1 domain-containing stress-associated protein 9			LOC18771211	-6.35094059282068	0	0	DOWN	endochitinase	pper04016:MAPK signaling pathway - plant; pper00520:Amino sugar and nucleotide sugar metabolism	biological process:cell wall organization or biogenesis(GO:0071554); biological process:aminoglycan catabolic process(GO:0006026); biological process:chitin metabolic process(GO:0006030); biological process:chitin catabolic process(GO:0006032); biological process:amino sugar metabolic process(GO:0006040); biological process:cell wall macromolecule catabolic process(GO:0016998); biological process…	PrpeC_p028	-6.16778258022532	4.12299583854466e-06	1.99137214700259e-05	DOWN		pper00195:Photosynthesis; pper00190:Oxidative phosphorylation	biological process:drug metabolic process(GO:0017144); biological process:ion transport(GO:0006811); biological process:cation transport(GO:0006812); biological process:purine nucleoside monophosphate metabolic process(GO:0009126); biological process:ribonucleoside monophosphate metabolic process(GO:0009161); biological process:purine ribonucleoside monophosphate metabolic process(GO:0009167); bi…	LOC18790043	6.13348986946754	2.38988504591571e-06	2.74250872978727e-05	UP	probable xyloglucan endotransglucosylase/hydrolase protein B		biological process:cellular carbohydrate metabolic process(GO:0044262); biological process:cellular glucan metabolic process(GO:0006073); biological process:glucan metabolic process(GO:0044042); biological process:cellular polysaccharide metabolic process(GO:0044264); biological process:polysaccharide metabolic process(GO:0005976); biological process:carbohydrate metabolic process(GO:0005975); ce…	LOC18775837	7.65265801730545	4.15383036236946e-09	3.00537141345107e-08	UP	transcription factor bHLH14		molecular function:protein dimerization activity(GO:0046983)	LOC18783916	9.70800855888719	4.1656058436017e-16	3.26814960620106e-15	UP	non-functional pseudokinase ZED1			LOC18781225	5.2766070085091
LOC18784762	4.95822425051767	0.000430635937312581	0.00283548385035816	UP	putative disease resistance protein At1g50180		molecular function:ADP binding(GO:0043531)	LOC18774898	6.31289640182348	1.08329129787839e-05	3.75389408330554e-05	UP	fatty acyl-CoA reductase 3	pper00073:Cutin, suberine and wax biosynthesis; pper04146:Peroxisome	molecular function:oxidoreductase activity, acting on the aldehyde or oxo group of donors, NAD or NADP as acceptor(GO:0016620); molecular function:oxidoreductase activity, acting on the aldehyde or oxo group of donors(GO:0016903)	LOC18793106	-6.14988563597331	2.82079619861676e-11	2.36082353754566e-10	DOWN	BTB/POZ domain-containing protein At4g08455			LOC18789438	6.04718010799643	3.21875324598626e-06	3.57824774914735e-05	UP	3-ketoacyl-CoA synthase 20	pper04626:Plant-pathogen interaction; pper00062:Fatty acid elongation	biological process:fatty acid biosynthetic process(GO:0006633); biological process:fatty acid metabolic process(GO:0006631); biological process:monocarboxylic acid biosynthetic process(GO:0072330); biological process:monocarboxylic acid metabolic process(GO:0032787); biological process:lipid biosynthetic process(GO:0008610); biological process:lipid metabolic process(GO:0006629); biological proce…	LOC18792928	7.62521271373662	3.74891450851951e-09	2.72394070416085e-08	UP	nudix hydrolase 1			LOC109948929	9.70299920706562	1.03212116657739e-15	7.93328636321915e-15	UP	cysteine-rich receptor-like protein kinase 29			LOC109949353	5.24200395277194
LOC18769641	4.91895741456462	3.98830811865745e-09	8.60093794405867e-08	UP	oxygen-evolving enhancer protein 1, chloroplastic	pper00195:Photosynthesis	biological process:photosynthesis, light reaction(GO:0019684); biological process:photosynthesis(GO:0015979); biological process:generation of precursor metabolites and energy(GO:0006091); cellular component:photosystem(GO:0009521); cellular component:photosynthetic membrane(GO:0034357); cellular component:photosystem II(GO:0009523); cellular component:thylakoid(GO:0009579); cellular component:th…	LOC109950163	6.30308154796048	2.40870710946885e-05	7.99630756963707e-05	UP	uncharacterized LOC109950163			LOC18771211	6.12025201623886	1.24658255534841e-259	4.00788051757299e-257	UP	endochitinase	pper00520:Amino sugar and nucleotide sugar metabolism; pper04016:MAPK signaling pathway - plant	biological process:aminoglycan catabolic process(GO:0006026); biological process:chitin metabolic process(GO:0006030); biological process:chitin catabolic process(GO:0006032); biological process:amino sugar metabolic process(GO:0006040); biological process:cell wall macromolecule catabolic process(GO:0016998); biological process:cell wall macromolecule metabolic process(GO:0044036); biological pr…	LOC18767036	6.02605017078331	2.225131417652e-05	0.000200600164854415	UP	protein BEARSKIN2			LOC18785199	7.61833561643461	9.56423161360357e-13	9.11195446735460e-12	UP	putative RING-H2 finger protein ATL21B		molecular function:pattern binding(GO:0001871); molecular function:polysaccharide binding(GO:0030247); molecular function:carbohydrate binding(GO:0030246)	LOC18780537	9.69692374605022	0	0	UP	beta-amyrin 28-oxidase		molecular function:oxidoreductase activity, acting on paired donors, with incorporation or reduction of molecular oxygen(GO:0016705); molecular function:heme binding(GO:0020037); molecular function:tetrapyrrole binding(GO:0046906); molecular function:iron ion binding(GO:0005506)	LOC18779467	5.23965919847409
LOC109950264	4.90498680083833	0.00366431160489883	0.016654825213132	UP	uncharacterized LOC109950264			LOC109949942	6.29916252791932	1.29091219081813e-05	4.44118545898835e-05	UP	inactive TPR repeat-containing thioredoxin TTL3-like			LOC18775548	-6.11098606247893	1.82097239775178e-63	9.78844468696858e-62	DOWN	uncharacterized LOC18775548			LOC18774218	5.97874363124761	2.27250399605842e-14	8.28299765940392e-13	UP	protein YLS3			LOC18783442	7.57931627083644	3.53931160152514e-72	1.90081257639623e-70	UP	putative UPF0481 protein At3g02645			LOC18793845	9.67709631384441	1.25560393269124e-51	2.41889969490708e-50	UP	berberine bridge enzyme-like 17		molecular function:flavin adenine dinucleotide binding(GO:0050660); molecular function:coenzyme binding(GO:0050662); molecular function:oxidoreductase activity, acting on CH-OH group of donors(GO:0016614)	LOC18777000	-5.22946785827115
LOC18784745	4.8838879954347	0.00054583103330225	0.00345473538146749	UP	laccase-15		molecular function:copper ion binding(GO:0005507)	LOC18774038	6.22707288433896	1.89611427186678e-05	6.3797662705534e-05	UP	uncharacterized LOC18774038			LOC18769458	6.09913334793625	2.933303382441e-06	1.44460952707499e-05	UP	salicylic acid-binding protein 2			LOC18774641	5.96714961186051	3.10640227592377e-05	0.000265769972495701	UP	secoisolariciresinol dehydrogenase			LOC18790189	7.54548731472111	1.69085809680888e-08	1.16293668663434e-07	UP	ethylene-responsive transcription factor ERF098		molecular function:DNA-binding transcription factor activity(GO:0003700); molecular function:transcription regulator activity(GO:0140110)	LOC18775702	9.67103521970808	2.06784450294438e-15	1.57214967100947e-14	UP	protein LURP-one-related 4			LOC18787317	-5.22316718049559
LOC18774898	4.86307659686312	4.66398809180625e-05	0.000416321040133035	UP	fatty acyl-CoA reductase 3	pper00073:Cutin, suberine and wax biosynthesis; pper04146:Peroxisome	molecular function:oxidoreductase activity, acting on the aldehyde or oxo group of donors, NAD or NADP as acceptor(GO:0016620); molecular function:oxidoreductase activity, acting on the aldehyde or oxo group of donors(GO:0016903)	LOC18789036	-6.20123877636756	2.14411240233275e-06	8.0520742935431e-06	DOWN	glu S.griseus protease inhibitor		biological process:response to stress(GO:0006950); molecular function:enzyme inhibitor activity(GO:0004857); molecular function:endopeptidase inhibitor activity(GO:0004866); molecular function:peptidase inhibitor activity(GO:0030414); molecular function:peptidase regulator activity(GO:0061134); molecular function:endopeptidase regulator activity(GO:0061135); molecular function:enzyme regulator ac…	LOC18784449	6.09602491660419	2.58090264869023e-31	6.12515057572165e-30	UP	thaumatin-like protein 1			LOC18775136	-5.82035953782043	1.64671650251621e-05	0.000153512297852493	DOWN	uncharacterized LOC18775136			LOC18782616	7.51565475291983	2.68997305078967e-08	1.8110108680406e-07	UP	UPF0481 protein At3g47200			LOC18774057	9.66747728204104	7.02434729962149e-16	5.44289646318349e-15	UP	uncharacterized LOC18774057			LOC18773589	5.22233550888569
LOC18785534	4.82493411876661	0.00384987937195668	0.0173609850686007	UP	probable inactive serine/threonine-protein kinase bub1			LOC18777606	6.18156350658084	3.0786347391399e-05	0.000101105594663146	UP	mavicyanin		molecular function:electron transfer activity(GO:0009055)	PrpeC_p021	-6.07840111585378	4.53131598895343e-06	2.17503167469765e-05	DOWN		pper00195:Photosynthesis	biological process:photosynthesis(GO:0015979); cellular component:photosynthetic membrane(GO:0034357); cellular component:photosystem(GO:0009521); cellular component:thylakoid(GO:0009579); cellular component:thylakoid part(GO:0044436); cellular component:photosystem I(GO:0009522); cellular component:membrane protein complex(GO:0098796)	LOC18776400	-5.8075495800661	0.000166902145059911	0.00114709754798324	DOWN	dehydration-responsive element-binding protein 1A		molecular function:DNA-binding transcription factor activity(GO:0003700); molecular function:transcription regulator activity(GO:0140110)	LOC18776015	7.47327374167788	4.3681750883001e-10	3.43406888894927e-09	UP	exocyst complex component EXO70B1		biological process:exocytosis(GO:0006887); biological process:secretion by cell(GO:0032940); biological process:secretion(GO:0046903); biological process:vesicle-mediated transport(GO:0016192); cellular component:cell periphery(GO:0071944); cellular component:exocyst(GO:0000145); cellular component:cell cortex(GO:0005938); cellular component:cell cortex part(GO:0044448); cellular component:cytopl…	LOC18790181	9.65951960567772	2.82326176653745e-30	3.62853982234983e-29	UP	protein SRC2			LOC18768837	5.21784971226379
LOC18780187	4.79494248079299	0.00616789589293636	0.0256137777405225	UP	ribonuclease 3-like protein 2		biological process:RNA processing(GO:0006396); molecular function:endoribonuclease activity(GO:0004521); molecular function:endonuclease activity(GO:0004519); molecular function:ribonuclease activity(GO:0004540); molecular function:ribonuclease III activity(GO:0004525); molecular function:double-stranded RNA-specific ribonuclease activity(GO:0032296); molecular function:hydrolase activity, acting…	LOC18791043	-6.15168330125219	2.62005076666184e-06	9.76864251670864e-06	DOWN	plant intracellular Ras-group-related LRR protein 6			PrpeC_p027	-6.05080578169533	2.31428748022547e-07	1.30840937833583e-06	DOWN		pper00195:Photosynthesis; pper00190:Oxidative phosphorylation	biological process:drug metabolic process(GO:0017144); biological process:ion transport(GO:0006811); biological process:cation transport(GO:0006812); biological process:energy coupled proton transport, down electrochemical gradient(GO:0015985); biological process:ATP synthesis coupled proton transport(GO:0015986); biological process:purine nucleoside monophosphate metabolic process(GO:0009126); b…	LOC18776669	-5.7426717801738	3.04051843784482e-05	0.000261443339412698	DOWN	dehydration-responsive element-binding protein 1E		molecular function:DNA-binding transcription factor activity(GO:0003700); molecular function:transcription regulator activity(GO:0140110)	LOC18792328	7.43216854028733	1.75174093798903e-07	1.08492502179176e-06	UP	monothiol glutaredoxin-S10		biological process:cellular homeostasis(GO:0019725); biological process:homeostatic process(GO:0042592); biological process:cell redox homeostasis(GO:0045454); biological process:regulation of biological quality(GO:0065008); molecular function:electron transfer activity(GO:0009055); molecular function:oxidoreductase activity, acting on a sulfur group of donors(GO:0016667); molecular function:disu…	LOC18772399	9.65827463882659	2.70734253484814e-94	8.50358054209815e-93	UP	probable mannitol dehydrogenase			LOC18769382	5.21668050473631
LOC18790104	4.79091378790483	0.00406231963300849	0.0181447482808378	UP	UPF0496 protein At1g20180			LOC18789801	-6.08947422667795	4.30540800979238e-06	1.56033405669574e-05	DOWN	WAT1-related protein At4g08290			LOC18766572	6.03026107066551	9.38355725408781e-34	2.44863423598249e-32	UP	pleiotropic drug resistance protein 1	pper02010:ABC transporters	molecular function:ATPase activity(GO:0016887); molecular function:nucleoside-triphosphatase activity(GO:0017111); molecular function:pyrophosphatase activity(GO:0016462); molecular function:hydrolase activity, acting on acid anhydrides, in phosphorus-containing anhydrides(GO:0016818); molecular function:hydrolase activity, acting on acid anhydrides(GO:0016817)	LOC18780213	5.73220719862812	0.000121571579292585	0.000876172480096111	UP	MLO-like protein 12		biological process:defense response(GO:0006952); biological process:response to stress(GO:0006950)	LOC18789177	7.42907419537428	4.95741332125104e-13	4.82571197304794e-12	UP	protein NRT1/ PTR FAMILY 5.13		molecular function:transporter activity(GO:0005215)	LOC18775422	9.65809008908807	9.20897425895758e-89	2.77735333123387e-87	UP	E3 ubiquitin-protein ligase PUB24		biological process:protein ubiquitination(GO:0016567); biological process:protein modification by small protein conjugation(GO:0032446); biological process:protein modification by small protein conjugation or removal(GO:0070647); molecular function:ubiquitin-protein transferase activity(GO:0004842); molecular function:ubiquitin-like protein transferase activity(GO:0019787)	LOC18788176	5.20959030681994
LOC18772974	-4.78080611168743	0.00955316435011359	0.0364950688398229	DOWN	probable aquaporin TIP1-2		molecular function:transporter activity(GO:0005215)	LOC18788236	6.08619711148145	9.39412501363984e-05	0.000288836833189648	UP	endo-1,3;1,4-beta-D-glucanase			LOC18768766	-6.02423727209506	2.29875780272855e-05	9.97220798332345e-05	DOWN	allene oxide synthase 1, chloroplastic	pper00592:alpha-Linolenic acid metabolism	molecular function:tetrapyrrole binding(GO:0046906); molecular function:oxidoreductase activity, acting on paired donors, with incorporation or reduction of molecular oxygen(GO:0016705); molecular function:heme binding(GO:0020037); molecular function:iron ion binding(GO:0005506); molecular function:cofactor binding(GO:0048037)	LOC18776361	5.6422595458399	0.000226932386406095	0.00148126471816705	UP	FT-interacting protein 1			LOC18789191	7.37391025339593	3.14189957641825e-08	2.10396460056765e-07	UP	patatin-like protein 2		biological process:lipid metabolic process(GO:0006629)	LOC18790048	9.64668145624229	1.20229934609362e-254	1.10429373273023e-252	UP	major allergen Pru ar 1		biological process:response to biotic stimulus(GO:0009607); biological process:defense response(GO:0006952); biological process:response to stress(GO:0006950)	LOC18778885	5.19673254347883
LOC18773846	4.76944839368886	0.00457958760054639	0.0200213881541686	UP	auxin efflux carrier component 5		biological process:transmembrane transport(GO:0055085)	LOC18777570	-6.06779096264681	7.62567979315125e-90	3.00787120297723e-88	DOWN	kunitz trypsin inhibitor 2		molecular function:enzyme inhibitor activity(GO:0004857); molecular function:endopeptidase inhibitor activity(GO:0004866); molecular function:peptidase inhibitor activity(GO:0030414); molecular function:peptidase regulator activity(GO:0061134); molecular function:endopeptidase regulator activity(GO:0061135); molecular function:enzyme regulator activity(GO:0030234); molecular function:molecular fu…	LOC109946611	6.01555321480839	3.51802225014404e-05	0.000148200492317563	UP	monothiol glutaredoxin-S17-like			LOC18767496	-5.62711738672269	0.00049429826237898	0.00286387074688434	DOWN	uncharacterized LOC18767496			LOC18775702	7.35363526256491	3.15536782999793e-08	2.1114791420602e-07	UP	protein LURP-one-related 4			LOC18769532	9.64081205552738	2.9558743921471e-276	2.89008234922512e-274	UP	salicylic acid-binding protein 2			LOC18770518	5.19523741817541
LOC18784433	-4.71297190459785	0.0116023800961758	0.0424954348827148	DOWN	thionin-like protein 2			LOC18780810	6.02398879583866	5.5958387457279e-05	0.00017728232888274	UP	peroxidase 47	pper00940:Phenylpropanoid biosynthesis	biological process:response to oxidative stress(GO:0006979); biological process:response to stress(GO:0006950); molecular function:tetrapyrrole binding(GO:0046906); molecular function:heme binding(GO:0020037); molecular function:peroxidase activity(GO:0004601); molecular function:oxidoreductase activity, acting on peroxide as acceptor(GO:0016684); molecular function:antioxidant activity(GO:001620…	LOC18777736	-6.00446907807872	2.81743289266835e-05	0.000120747123971501	DOWN	probable glutathione S-transferase	pper00480:Glutathione metabolism		LOC18767587	5.60362066707046	5.55535254866214e-15	2.0890709467876e-13	UP	uncharacterized LOC18767587			LOC18780538	7.34690973909739	7.86181176113008e-61	3.3816584822417e-59	UP	15.4 kDa class V heat shock protein	pper04141:Protein processing in endoplasmic reticulum		LOC18779462	9.64058833195584	8.80494417784972e-16	6.78790652049067e-15	UP	epidermis-specific secreted glycoprotein EP1			LOC18769641	5.17573906137483
LOC18771596	4.69056640365209	0.000152873978842762	0.0011672481003616	UP	beta-fructofuranosidase, insoluble isoenzyme 1	pper00500:Starch and sucrose metabolism; pper00052:Galactose metabolism		LOC18783560	6.00698440997244	6.20626889226709e-05	0.000195558788588122	UP	receptor-like protein kinase FERONIA			LOC18783179	5.99515633861094	9.68495098668533e-120	1.09292427028555e-117	UP	thaumatin-like protein 1			LOC18787499	5.57494930363366	3.02594377658799e-08	5.01607287550519e-07	UP	protein ECERIFERUM 1	pper00073:Cutin, suberine and wax biosynthesis	biological process:fatty acid biosynthetic process(GO:0006633); biological process:fatty acid metabolic process(GO:0006631); biological process:monocarboxylic acid biosynthetic process(GO:0072330); biological process:monocarboxylic acid metabolic process(GO:0032787); biological process:lipid biosynthetic process(GO:0008610); biological process:lipid metabolic process(GO:0006629); biological proce…	LOC18780881	7.29873810554179	1.06363440747348e-72	5.81195812711596e-71	UP	receptor-like protein 12			LOC18786163	9.63742661670477	6.91427810435353e-16	5.3604658188515e-15	UP	hexose carrier protein HEX6		biological process:transmembrane transport(GO:0055085); molecular function:transporter activity(GO:0005215); molecular function:transmembrane transporter activity(GO:0022857)	LOC18766541	-5.13814856922282
LOC18793751	4.66795639579292	0.000155617162456383	0.00118610140944419	UP	MLP-like protein 423		biological process:response to biotic stimulus(GO:0009607); biological process:defense response(GO:0006952); biological process:response to stress(GO:0006950)	LOC18785277	-5.97751015397981	6.86856190357975e-06	2.43070484512685e-05	DOWN	probable polygalacturonase		biological process:carbohydrate metabolic process(GO:0005975); molecular function:hydrolase activity, acting on glycosyl bonds(GO:0016798); molecular function:hydrolase activity, hydrolyzing O-glycosyl compounds(GO:0004553); molecular function:polygalacturonase activity(GO:0004650)	LOC18782337	-5.92272858423591	4.54715406314265e-05	0.000187838800572002	DOWN	CASP-like protein 3A1			LOC18791463	5.57078497771705	0.000208936045219657	0.00138617882742336	UP	nudix hydrolase 1			LOC109947208	7.22594927355427	1.19730719156775e-138	2.00944493570527e-136	UP	extensin-like			LOC18780094	9.60987520835559	0	0	UP	probable inactive 2-oxoglutarate-dependent dioxygenase AOP2			LOC18773195	5.13092494115511
LOC18788176	4.66677719519567	0.00844865791894541	0.0330648165398034	UP	serine/threonine-protein kinase-like protein ACR4			LOC109949339	-5.97315433661555	0.0043938661197507	0.0102432189293396	DOWN	uncharacterized LOC109949339			LOC18793164	5.91214077824867	5.29682790694577e-05	0.000216445917348575	UP	suppressor protein SRP40		molecular function:calmodulin binding(GO:0005516)	LOC18790989	5.56546878167497	0.000485762824965404	0.00282269303092442	UP	cytochrome P450 711A1		molecular function:iron ion binding(GO:0005506); molecular function:heme binding(GO:0020037); molecular function:tetrapyrrole binding(GO:0046906); molecular function:cofactor binding(GO:0048037); molecular function:oxidoreductase activity, acting on paired donors, with incorporation or reduction of molecular oxygen(GO:0016705)	LOC18773659	7.13500937341072	1.61031247204712e-06	8.944752818283e-06	UP	non-cyanogenic beta-glucosidase		biological process:carbohydrate metabolic process(GO:0005975); molecular function:hydrolase activity, hydrolyzing O-glycosyl compounds(GO:0004553); molecular function:hydrolase activity, acting on glycosyl bonds(GO:0016798)	LOC18775724	9.59342030534471	1.26317603269019e-20	1.20398948273081e-19	UP	protein DETOXIFICATION 49		biological process:transmembrane transport(GO:0055085); biological process:drug transmembrane transport(GO:0006855); biological process:drug transport(GO:0015893); biological process:response to drug(GO:0042493); biological process:response to chemical(GO:0042221); molecular function:transporter activity(GO:0005215); molecular function:transmembrane transporter activity(GO:0022857); molecular fun…	LOC18781714	5.10957305016929
LOC18788933	-4.64307844072318	0.00233997538445331	0.0115379708805746	DOWN	palmitoyl-acyl carrier protein thioesterase, chloroplastic		biological process:fatty acid biosynthetic process(GO:0006633); biological process:fatty acid metabolic process(GO:0006631); biological process:monocarboxylic acid biosynthetic process(GO:0072330); biological process:lipid biosynthetic process(GO:0008610); biological process:monocarboxylic acid metabolic process(GO:0032787); biological process:cellular lipid metabolic process(GO:0044255); biologi…	LOC18783011	-5.92001899873748	8.50549343019872e-06	2.97780054282637e-05	DOWN	transcription initiation factor IIB	pper03022:Basal transcription factors		LOC18766330	-5.88580303507048	1.00625761246468e-07	5.94955923539147e-07	DOWN	uncharacterized LOC18766330			LOC18789036	5.56228441387142	0.000469718000145595	0.00274020139999662	UP	glu S.griseus protease inhibitor		biological process:response to stress(GO:0006950); molecular function:enzyme inhibitor activity(GO:0004857); molecular function:molecular function regulator(GO:0098772); molecular function:enzyme regulator activity(GO:0030234)	LOC18769055	-7.13141445103189	8.05285092311912e-09	5.69915055729933e-08	DOWN	early nodulin-93			LOC18778295	9.58211859401257	0	0	UP	probable inactive 2-oxoglutarate-dependent dioxygenase AOP2			LOC109947929	-5.10583340378544
LOC18778371	4.5944200888483	0.00779154381971936	0.0309774900228703	UP	tetraspanin-19			LOC18772575	5.90024312955495	6.80636490900399e-06	2.41006547935638e-05	UP	omega-hydroxypalmitate O-feruloyl transferase	pper00940:Phenylpropanoid biosynthesis; pper00941:Flavonoid biosynthesis; pper00945:Stilbenoid, diarylheptanoid and gingerol biosynthesis	molecular function:transferase activity, transferring acyl groups other than amino-acyl groups(GO:0016747); molecular function:transferase activity, transferring acyl groups(GO:0016746)	LOC18766148	5.86519561015284	6.27203330662911e-05	0.000253559780652337	UP	polyketide synthase 1	pper00960:Tropane, piperidine and pyridine alkaloid biosynthesis; pper04712:Circadian rhythm - plant; pper00941:Flavonoid biosynthesis		LOC18791152	-5.53526149433707	0.000523887948195954	0.00301194786740142	DOWN	putative disease resistance protein RGA1		molecular function:ADP binding(GO:0043531)	LOC18772169	7.06672822953426	6.01030079724728e-45	1.88607051896256e-43	UP	ethylene-responsive transcription factor 1B	pper04016:MAPK signaling pathway - plant; pper04075:Plant hormone signal transduction	molecular function:DNA-binding transcription factor activity(GO:0003700); molecular function:transcription regulator activity(GO:0140110)	LOC18789400	9.58079821529897	0	0	UP	IAA-amino acid hydrolase ILR1-like 1			LOC18786368	-5.06926619388763
LOC18770586	4.58245939221799	0.00876688711688925	0.0340930123968496	UP	protein SUPPRESSOR OF npr1-1, CONSTITUTIVE 1		biological process:signal transduction(GO:0007165); biological process:signaling(GO:0023052); biological process:cell communication(GO:0007154); biological process:cellular response to stimulus(GO:0051716); molecular function:ADP binding(GO:0043531)	LOC18769877	5.87733672286132	6.56237413445091e-06	2.32631985989836e-05	UP	PAN domain-containing protein At5g03700			LOC18789587	-5.85771053250419	5.05116273543654e-05	0.000207152377886495	DOWN	serine carboxypeptidase-like 35		biological process:proteolysis(GO:0006508); molecular function:serine-type carboxypeptidase activity(GO:0004185); molecular function:carboxypeptidase activity(GO:0004180); molecular function:exopeptidase activity(GO:0008238); molecular function:serine-type exopeptidase activity(GO:0070008); molecular function:serine-type peptidase activity(GO:0008236); molecular function:serine hydrolase activity…	LOC18769641	5.53250418889698	4.22248104261999e-12	1.22921882659708e-10	UP	oxygen-evolving enhancer protein 1, chloroplastic	pper00195:Photosynthesis	biological process:photosynthesis(GO:0015979); biological process:photosynthesis, light reaction(GO:0019684); biological process:generation of precursor metabolites and energy(GO:0006091); cellular component:photosystem(GO:0009521); cellular component:photosystem II oxygen evolving complex(GO:0009654); cellular component:photosynthetic membrane(GO:0034357); cellular component:extrinsic component …	LOC18783477	7.05882781733663	1.18522621385243e-08	8.23611724280378e-08	UP	UPF0481 protein At3g47200			LOC18778131	9.5799063004036	2.45571490814208e-15	1.86159363565952e-14	UP	L-type lectin-domain containing receptor kinase IX.1		molecular function:carbohydrate binding(GO:0030246)	LOC18777380	-5.04169433141278
LOC18771849	4.56586111492863	4.70743672802651e-09	1.00022922477589e-07	UP	uncharacterized LOC18771849			LOC18792620	5.8672259616169	0.000262685508686203	0.000757952913015542	UP	BURP domain protein RD22			LOC18780505	-5.82983569947312	1.69260212888736e-43	5.82665460126074e-42	DOWN	probable RNA-dependent RNA polymerase 1		molecular function:5'-3' RNA polymerase activity(GO:0034062); molecular function:RNA polymerase activity(GO:0097747); molecular function:catalytic activity, acting on RNA(GO:0140098); molecular function:nucleotidyltransferase activity(GO:0016779)	LOC18769272	-5.5270170121751	0.000449265073156805	0.00263906137920743	DOWN	thaumatin-like protein 2			LOC18774517	7.05328082061543	1.9416136336493e-159	4.29370723196539e-157	UP	cytochrome P450 94C1		molecular function:tetrapyrrole binding(GO:0046906); molecular function:heme binding(GO:0020037); molecular function:oxidoreductase activity, acting on paired donors, with incorporation or reduction of molecular oxygen(GO:0016705); molecular function:iron ion binding(GO:0005506)	LOC18768564	9.57578644235972	2.01664360430748e-48	3.68219684617831e-47	UP	probable pectinesterase/pectinesterase inhibitor 7	pper00040:Pentose and glucuronate interconversions	biological process:cell wall organization or biogenesis(GO:0071554); biological process:cell wall modification(GO:0042545); biological process:external encapsulating structure organization(GO:0045229); biological process:cell wall organization(GO:0071555); biological process:cellular component organization(GO:0016043); biological process:cellular component organization or biogenesis(GO:0071840); …	LOC109946534	5.03463565510644
LOC18770886	4.55090372889542	0.00018138668554977	0.00134783307269675	UP	O-acyltransferase WSD1		biological process:lipid biosynthetic process(GO:0008610); biological process:cellular lipid metabolic process(GO:0044255); biological process:lipid metabolic process(GO:0006629); biological process:glycerolipid biosynthetic process(GO:0045017); biological process:glycerolipid metabolic process(GO:0046486); molecular function:transferase activity, transferring acyl groups other than amino-acyl gr…	LOC18792351	5.83308693049594	0.000173163177011307	0.000513380803035111	UP	protein PHYTOCHROME KINASE SUBSTRATE 2			LOC18778790	5.81539664966187	0.000111558118616041	0.000431739800412752	UP	uncharacterized LOC18778790			LOC18793838	5.5203526424427	4.4205748488088e-05	0.000362678804592999	UP	signal peptidase complex-like protein DTM1		biological process:protein processing(GO:0016485); biological process:protein maturation(GO:0051604); biological process:proteolysis(GO:0006508); biological process:peptide metabolic process(GO:0006518); biological process:cellular amide metabolic process(GO:0043603); cellular component:endoplasmic reticulum membrane(GO:0005789); cellular component:nuclear outer membrane-endoplasmic reticulum mem…	LOC18767591	7.03052319985583	1.49964854997311e-15	1.67691218285809e-14	UP	benzyl alcohol O-benzoyltransferase		molecular function:transferase activity, transferring acyl groups(GO:0016746); molecular function:transferase activity, transferring acyl groups other than amino-acyl groups(GO:0016747)	LOC18772618	9.57401444159946	6.63930390380103e-133	2.83432818766492e-131	UP	protein LURP-one-related 15			LOC18768244	5.02614293557657
LOC109946534	4.51808467656685	0.0135847120747391	0.0480290851364345	UP	uncharacterized LOC109946534			LOC18773985	-5.8216612391803	3.85140470775939e-06	1.40755450798564e-05	DOWN	uncharacterized LOC18773985		molecular function:DNA-binding transcription factor activity(GO:0003700); molecular function:transcription regulator activity(GO:0140110)	LOC18775600	-5.80944077020559	7.52340689506274e-05	0.000299320227625191	DOWN	probable LRR receptor-like serine/threonine-protein kinase At3g47570			LOC18768837	5.51057209318308	0.000332166247863403	0.0020443740660022	UP	protein STAY-GREEN LIKE, chloroplastic	pper00860:Porphyrin metabolism		LOC18786897	7.01872538079414	2.24147791096803e-06	1.22302061806868e-05	UP	em protein H5			LOC18777956	9.56416875091548	2.91784849229213e-15	2.20273942220111e-14	UP	uncharacterized LOC18777956			LOC18792023	4.99836317820114
LOC18786671	4.49255041344356	0.00290434293909721	0.0137635197743453	UP	zinc finger protein ZAT5			LOC109948184	5.81656257232182	1.3108248698543e-07	5.5544082663801e-07	UP	uncharacterized LOC109948184			LOC18793530	-5.80776614380113	4.50540574032322e-25	8.40877478807313e-24	DOWN	BTB/POZ domain-containing protein At4g08455			LOC18780184	5.50300668445435	5.72472656707632e-05	0.00045478209668864	UP	calcium-binding protein PBP1		molecular function:calcium ion binding(GO:0005509)	LOC18771428	6.98388671438656	8.56813825017696e-08	5.48927384759974e-07	UP	beta-glucosidase 12		biological process:carbohydrate metabolic process(GO:0005975); molecular function:hydrolase activity, hydrolyzing O-glycosyl compounds(GO:0004553); molecular function:hydrolase activity, acting on glycosyl bonds(GO:0016798)	LOC109946293	9.5639521082015	2.76811774864121e-15	2.09318043146732e-14	UP	uncharacterized LOC109946293			LOC18774218	4.99261087785241
LOC18771335	4.48998099154578	1.02999416522417e-09	2.47041675334998e-08	UP	probable sulfate transporter 3.5		biological process:ion transport(GO:0006811); biological process:sulfate transport(GO:0008272); biological process:sulfur compound transport(GO:0072348); biological process:inorganic anion transport(GO:0015698); biological process:anion transport(GO:0006820); molecular function:transporter activity(GO:0005215); molecular function:sulfate transmembrane transporter activity(GO:0015116); molecular f…	LOC18766756	-5.79033679693616	1.71576500279817e-05	5.8043567828115e-05	DOWN	uncharacterized LOC18766756		molecular function:copper ion binding(GO:0005507)	LOC18793529	-5.8023820841162	7.85548468583364e-05	0.000311586264074966	DOWN	U-box domain-containing protein 21		biological process:protein ubiquitination(GO:0016567); biological process:protein modification by small protein conjugation(GO:0032446); biological process:protein modification by small protein conjugation or removal(GO:0070647); molecular function:ubiquitin-protein transferase activity(GO:0004842); molecular function:ubiquitin-like protein transferase activity(GO:0019787)	LOC18786369	5.49718780413595	7.56790717878994e-09	1.39637308080017e-07	UP	cytochrome P450 714C2		molecular function:iron ion binding(GO:0005506); molecular function:heme binding(GO:0020037); molecular function:tetrapyrrole binding(GO:0046906); molecular function:cofactor binding(GO:0048037); molecular function:oxidoreductase activity, acting on paired donors, with incorporation or reduction of molecular oxygen(GO:0016705)	LOC109948155	6.94309094228643	5.81068790781723e-07	3.39625312821021e-06	UP	LRR receptor-like serine/threonine-protein kinase FLS2			LOC18777765	9.5579134069753	3.26421596114613e-15	2.46013391916301e-14	UP	uncharacterized LOC18777765			LOC18776666	4.95770805033733
LOC18782622	4.48563493359728	0.00237559967617217	0.0116803689926955	UP	putative disease resistance protein RGA3		molecular function:ADP binding(GO:0043531)	LOC18775976	5.75731348043283	0.000172482747088566	0.000511444789006894	UP	uncharacterized LOC18775976			LOC18789944	5.79785407895316	4.12707349579125e-19	5.83128792440156e-18	UP	uncharacterized LOC18789944			LOC18780639	-5.4517149792734	0.000750518394708439	0.00408740682384538	DOWN	disease resistance protein At4g27190	pper04626:Plant-pathogen interaction	molecular function:ADP binding(GO:0043531)	LOC18777539	6.91235849368662	6.07680351827118e-08	3.95792362207011e-07	UP	WAT1-related protein At3g30340			LOC18789191	9.55589518440549	3.33814037613051e-15	2.51272437418499e-14	UP	patatin-like protein 2		biological process:lipid metabolic process(GO:0006629)	LOC18771813	-4.94524743941965
LOC109950177	-4.48228745681597	9.17252978063934e-49	4.41224161698143e-46	DOWN	uncharacterized LOC109950177			LOC18789656	5.74797482469995	0	0	UP	desiccation-related protein PCC13-62			LOC18790605	-5.78110360614986	7.49035379763083e-05	0.000298283778246388	DOWN	BTB/POZ domain-containing protein At4g08455			LOC18788176	5.44723785921025	0.000606230009371445	0.00340587908297217	UP	serine/threonine-protein kinase-like protein ACR4			LOC18788687	6.8956148375473	4.53800621017193e-72	2.43022514907697e-70	UP	ethylene-responsive transcription factor ERF020		molecular function:DNA-binding transcription factor activity(GO:0003700); molecular function:transcription regulator activity(GO:0140110)	LOC18792368	9.54148346456583	1.64921299831424e-15	1.25649717584176e-14	UP	galactoside 2-alpha-L-fucosyltransferase		biological process:cell wall organization or biogenesis(GO:0071554); biological process:cellular component organization or biogenesis(GO:0071840); biological process:cellular component biogenesis(GO:0044085); molecular function:transferase activity, transferring hexosyl groups(GO:0016758); molecular function:transferase activity, transferring glycosyl groups(GO:0016757)	LOC18790726	4.93910626306243
LOC18788605	4.47679022195919	0.0142158068868364	0.0496420907157382	UP	probable RNA helicase SDE3			LOC18767970	-5.74269608381119	8.96892370085423e-08	3.85916073539754e-07	DOWN	sorbitol dehydrogenase	pper00040:Pentose and glucuronate interconversions; pper00051:Fructose and mannose metabolism		LOC18771270	-5.77156873010307	7.97628488177812e-05	0.000316083475315114	DOWN	aluminum-activated malate transporter 8		biological process:ion transport(GO:0006811); biological process:organic anion transport(GO:0015711); biological process:organic acid transport(GO:0015849); biological process:carboxylic acid transport(GO:0046942); biological process:anion transport(GO:0006820); biological process:organic substance transport(GO:0071702)	LOC18773395	5.41002185255102	7.32544302007888e-05	0.000563815036772579	UP	probable LRR receptor-like serine/threonine-protein kinase At1g06840			LOC18785684	6.88904789124556	6.74269953977259e-07	3.90818758091599e-06	UP	protein DMR6-LIKE OXYGENASE 2			LOC18769426	9.53636589312833	3.38163124458817e-15	2.54440818428136e-14	UP	potassium channel AKT1		biological process:transmembrane transport(GO:0055085); biological process:ion transport(GO:0006811); molecular function:transporter activity(GO:0005215); molecular function:transmembrane transporter activity(GO:0022857); molecular function:ion channel activity(GO:0005216); molecular function:channel activity(GO:0015267); molecular function:passive transmembrane transporter activity(GO:0022803); …	LOC18790382	4.9223620889127
LOC18780372	4.46431396387196	0.00290349756976383	0.0137635197743453	UP	uncharacterized LOC18780372			LOC18783913	-5.66988937995051	9.88246883326088e-14	6.72173609267766e-13	DOWN	auxin-responsive protein SAUR50		biological process:response to chemical(GO:0042221); biological process:response to auxin(GO:0009733); biological process:response to endogenous stimulus(GO:0009719); biological process:response to hormone(GO:0009725); biological process:response to organic substance(GO:0010033)	LOC18776265	-5.77011182059418	8.13802761454704e-05	0.000322118444952106	DOWN	IRK-interacting protein			LOC18780569	-5.38875101862077	5.45630248887523e-215	2.42628130924059e-211	DOWN	uncharacterized LOC18780569			LOC18771075	6.87158710878317	2.72046574912891e-45	8.62337178522364e-44	UP	putative transcription factor bHLH041		molecular function:protein dimerization activity(GO:0046983)	LOC18782508	9.52829953286074	8.2574437367204e-102	2.78092355177773e-100	UP	U-box domain-containing protein 21		biological process:protein ubiquitination(GO:0016567); biological process:protein modification by small protein conjugation(GO:0032446); biological process:protein modification by small protein conjugation or removal(GO:0070647); molecular function:ubiquitin-protein transferase activity(GO:0004842); molecular function:ubiquitin-like protein transferase activity(GO:0019787)	LOC109949565	4.91946648327086
LOC18789863	4.46238818488704	0.0111298173519531	0.0411299716354612	UP	VAN3-binding protein			LOC109948849	5.66172623901669	0.000460283573904607	0.00127695325477149	UP	uncharacterized LOC109948849			PrpeC_p048	-5.76942366770043	3.25246691130492e-07	1.80936461602001e-06	DOWN		pper00195:Photosynthesis	biological process:photosynthesis(GO:0015979); biological process:photosynthesis, light reaction(GO:0019684); biological process:electron transport chain(GO:0022900); biological process:generation of precursor metabolites and energy(GO:0006091); cellular component:photosynthetic membrane(GO:0034357); cellular component:photosystem(GO:0009521); cellular component:thylakoid(GO:0009579); cellular co…	LOC18771903	5.37601075482216	0.000581177334909559	0.00329126321015204	UP	uncharacterized LOC18771903			LOC18770210	-6.8611634505194	0	0	DOWN	1-aminocyclopropane-1-carboxylate oxidase 1	pper00270:Cysteine and methionine metabolism		LOC18769326	9.52059840961048	1.74034289191945e-56	3.59657679914172e-55	UP	syntaxin-121	pper04130:SNARE interactions in vesicular transport	biological process:vesicle-mediated transport(GO:0016192)	LOC18787311	4.89822737144573
LOC18776214	4.45413637182103	0.011850388958944	0.0431392023548525	UP	uncharacterized LOC18776214			LOC18768411	5.66169115794156	0.000292835321271161	0.000839365277147957	UP	probable glutathione S-transferase	pper00480:Glutathione metabolism		LOC18779864	5.66790994405303	8.94861259132941e-10	6.53317731603484e-09	UP	glucan endo-1,3-beta-glucosidase 14		biological process:carbohydrate metabolic process(GO:0005975); molecular function:hydrolase activity, acting on glycosyl bonds(GO:0016798); molecular function:hydrolase activity, hydrolyzing O-glycosyl compounds(GO:0004553)	LOC18766943	5.34931307491245	1.86613767893183e-08	3.22889016489888e-07	UP	tryptophan aminotransferase-related protein 4		molecular function:lyase activity(GO:0016829)	LOC18790246	6.84870173758106	3.02427483168251e-49	1.05664115262335e-47	UP	nudix hydrolase 17, mitochondrial			LOC18775537	9.51339963762866	0	0	UP	probable mannitol dehydrogenase			LOC18770635	4.88342376505202
LOC18791602	4.42341928274114	0.0141172769516164	0.0494076162027367	UP	boron transporter 4		biological process:ion transport(GO:0006811); biological process:anion transport(GO:0006820)	LOC18780814	5.65618668300573	7.75073667561509e-07	3.05655240238746e-06	UP	leucine-rich repeat receptor-like serine/threonine-protein kinase At1g17230			LOC18766791	5.66516224528555	8.42870247286949e-18	1.12119508304212e-16	UP	basic 7S globulin			LOC18783754	-5.34314441712421	2.97356091785375e-08	4.94768269839707e-07	DOWN	xyloglucan endotransglucosylase/hydrolase 2		biological process:cellular carbohydrate metabolic process(GO:0044262); biological process:cellular glucan metabolic process(GO:0006073); biological process:glucan metabolic process(GO:0044042); biological process:cellular polysaccharide metabolic process(GO:0044264); biological process:polysaccharide metabolic process(GO:0005976); biological process:carbohydrate metabolic process(GO:0005975); ce…	LOC18782001	6.84582745850989	5.98527627289785e-18	7.60170527713925e-17	UP	AAA-ATPase ASD, mitochondrial			LOC109946536	9.50196779223331	6.18346071047802e-74	1.6018862746546e-72	UP	VQ motif-containing protein 20-like			LOC18785176	4.87864154116542
LOC109946275	4.36586628259254	0.000656080327035619	0.00403170440854358	UP	uncharacterized LOC109946275			LOC18787730	-5.65234724797798	1.1385529889095e-19	1.03417639309078e-18	DOWN	putative expansin-B2			LOC109946293	5.64113214328886	0.000222289393228798	0.00081669065558834	UP	uncharacterized LOC109946293			LOC18778358	5.3222302075564	0.000604064198770527	0.00339809039757013	UP	protein SOMBRERO			LOC18779301	6.8362901236972	4.98754452389933e-10	3.89492623247759e-09	UP	stigma-specific STIG1-like protein 1			LOC18780370	9.49888097503731	4.49049506181533e-15	3.35928190843988e-14	UP	calcium-binding protein PBP1		molecular function:calcium ion binding(GO:0005509)	LOC18780774	-4.86213023297797
LOC18785990	4.34864150909959	1.58109296343327e-05	0.00016278945427067	UP	receptor-like protein 2			LOC18781509	5.5631411914226	1.23340264373847e-32	1.77558588921517e-31	UP	probable GMP synthase [glutamine-hydrolyzing]	pper03410:Base excision repair	biological process:response to stress(GO:0006950); biological process:base-excision repair(GO:0006284); biological process:DNA metabolic process(GO:0006259); biological process:DNA repair(GO:0006281); biological process:cellular response to DNA damage stimulus(GO:0006974); biological process:cellular response to stress(GO:0033554); biological process:cellular response to stimulus(GO:0051716); mol…	LOC18783492	-5.6084861857326	2.61003910074601e-05	0.000112566606622911	DOWN	ribulose bisphosphate carboxylase small chain, chloroplastic	pper00630:Glyoxylate and dicarboxylate metabolism; pper00710:Carbon fixation in photosynthetic organisms; pper01200:Carbon metabolism		LOC18778699	5.31966986761764	7.97262713071751e-51	2.25093839323924e-48	UP	cysteine-rich receptor-like protein kinase 10			LOC18778496	-6.79062557815287	4.06374722775537e-20	5.67927558662585e-19	DOWN	probable cysteine desulfurase			LOC18778699	9.48370344854855	8.8483075815869e-111	3.23123135901083e-109	UP	cysteine-rich receptor-like protein kinase 10			LOC18780196	4.85094677659121
LOC109947071	-4.32309797126952	0.00786618977682208	0.0311784866938036	DOWN	TMV resistance protein N-like		biological process:signal transduction(GO:0007165); biological process:signaling(GO:0023052); biological process:cell communication(GO:0007154); biological process:cellular response to stimulus(GO:0051716)	LOC109950232	5.55941960953297	0.000537265597872363	0.0014784313067116	UP	protein trichome birefringence-like 8			LOC18779427	-5.60793330108367	2.90020041560019e-05	0.000123951379688556	DOWN	uncharacterized LOC18779427			LOC18783901	-5.2957652431019	0.00159436871013495	0.00772304908692005	DOWN	pectate lyase	pper00040:Pentose and glucuronate interconversions		LOC18781850	6.77557592838401	1.61428592833711e-06	8.96417506497864e-06	UP	myb-related protein 315			LOC18786860	9.47900494034872	3.8814226168705e-15	2.91443235798542e-14	UP	protein RDM1		biological process:macromolecule methylation(GO:0043414); biological process:methylation(GO:0032259); biological process:DNA metabolic process(GO:0006259); cellular component:nucleus(GO:0005634)	LOC18774898	4.83709539494771
LOC18790143	4.32280874852274	1.96928009698795e-05	0.000196214173990451	UP	WAT1-related protein At4g08300			LOC18774371	5.55937708779633	0.000572194426264054	0.00156600138049119	UP	uncharacterized LOC18774371			LOC18773985	-5.59195377339065	0.000171709497517774	0.000645758074973044	DOWN	uncharacterized LOC18773985		molecular function:transcription regulator activity(GO:0140110); molecular function:DNA-binding transcription factor activity(GO:0003700)	LOC109949124	-5.26362764941475	0.000290098990475755	0.00182525318132021	DOWN	uncharacterized N-acetyltransferase DDB_G0290199			LOC18784233	6.77518566490994	4.76513135374968e-06	2.48944341457567e-05	UP	wall-associated receptor kinase-like 1		molecular function:pattern binding(GO:0001871); molecular function:polysaccharide binding(GO:0030247); molecular function:carbohydrate binding(GO:0030246); molecular function:calcium ion binding(GO:0005509)	LOC18779920	9.47044192884603	5.69786266913224e-15	4.22599227164922e-14	UP	E3 ubiquitin-protein ligase ATL41			LOC18779384	4.83233737024203
LOC18792692	4.3163923329469	0.00462140817835222	0.0201889317418076	UP	protein SHOOT GRAVITROPISM 5			LOC18775625	5.5535822791217	0.000457065251652496	0.00126877940783821	UP	probable mannitol dehydrogenase			LOC18772260	5.56699616215038	0.00025676896383208	0.000928750401973817	UP	uncharacterized LOC18772260			LOC18781225	5.24222256170941	0.000867927763389114	0.00462251210995932	UP	MDIS1-interacting receptor like kinase 2			LOC18766898	-6.7746873072725	2.51823407383508e-33	5.758545728209e-32	DOWN	TMV resistance protein N		molecular function:ADP binding(GO:0043531)	LOC18767622	9.43916773405593	4.61744039366201e-29	5.7436915868083e-28	UP	cytochrome P450 87A3		molecular function:oxidoreductase activity, acting on paired donors, with incorporation or reduction of molecular oxygen(GO:0016705); molecular function:heme binding(GO:0020037); molecular function:tetrapyrrole binding(GO:0046906); molecular function:iron ion binding(GO:0005506)	LOC18784433	-4.80388413313338
LOC18771402	4.3089182815578	3.11205433968733e-27	4.24342086617051e-25	UP	ABC transporter G family member 32	pper02010:ABC transporters	molecular function:ATPase activity(GO:0016887); molecular function:nucleoside-triphosphatase activity(GO:0017111); molecular function:pyrophosphatase activity(GO:0016462); molecular function:hydrolase activity, acting on acid anhydrides, in phosphorus-containing anhydrides(GO:0016818); molecular function:hydrolase activity, acting on acid anhydrides(GO:0016817)	LOC18785350	-5.54919302549418	5.21399103013942e-05	0.000166002441381077	DOWN	pectinesterase 2	pper00040:Pentose and glucuronate interconversions	biological process:cell wall modification(GO:0042545); biological process:cell wall organization or biogenesis(GO:0071554); biological process:external encapsulating structure organization(GO:0045229); biological process:cell wall organization(GO:0071555); biological process:cellular component organization or biogenesis(GO:0071840); biological process:cellular component organization(GO:0016043); …	LOC18779607	-5.54353869031666	3.97777163419945e-05	0.000166008397371439	DOWN	berberine bridge enzyme-like 17		molecular function:cofactor binding(GO:0048037); molecular function:flavin adenine dinucleotide binding(GO:0050660); molecular function:coenzyme binding(GO:0050662); molecular function:oxidoreductase activity, acting on CH-OH group of donors(GO:0016614)	LOC18794041	5.23042616953917	0.00171342476445795	0.00821917105863366	UP	(+)-neomenthol dehydrogenase	pper00790:Folate biosynthesis		LOC18779930	6.76355230771417	7.28654223476409e-06	3.71783752407331e-05	UP	delta-9 acyl-lipid desaturase 1		biological process:lipid metabolic process(GO:0006629)	LOC18785199	9.43559641358614	8.31536225868865e-15	6.11002739541462e-14	UP	putative RING-H2 finger protein ATL21B		molecular function:carbohydrate binding(GO:0030246); molecular function:pattern binding(GO:0001871); molecular function:polysaccharide binding(GO:0030247)	LOC18775476	-4.79592184333505
LOC18784588	4.28316959557094	9.16168277859337e-09	1.85993975002229e-07	UP	protein ENHANCED DISEASE RESISTANCE 2		molecular function:lipid binding(GO:0008289)	LOC18786681	-5.53862604346776	5.74873644376627e-05	0.000182002674073218	DOWN	pectinesterase 2	pper00040:Pentose and glucuronate interconversions	biological process:cell wall modification(GO:0042545); biological process:cell wall organization or biogenesis(GO:0071554); biological process:external encapsulating structure organization(GO:0045229); biological process:cell wall organization(GO:0071555); biological process:cellular component organization or biogenesis(GO:0071840); biological process:cellular component organization(GO:0016043); …	LOC18792573	-5.53077981389537	0.000232273351215222	0.000849160674685127	DOWN	lignin-forming anionic peroxidase	pper00940:Phenylpropanoid biosynthesis	biological process:response to stress(GO:0006950); biological process:response to oxidative stress(GO:0006979); molecular function:tetrapyrrole binding(GO:0046906); molecular function:heme binding(GO:0020037); molecular function:cofactor binding(GO:0048037); molecular function:peroxidase activity(GO:0004601); molecular function:oxidoreductase activity, acting on peroxide as acceptor(GO:0016684); …	LOC18769427	5.2287509971286	0.00019362604482877	0.00130307471031757	UP	receptor-like protein 12			LOC18773884	6.72999616452952	1.20085584510467e-05	5.93388205058686e-05	UP	beta-glucosidase 12		biological process:carbohydrate metabolic process(GO:0005975); molecular function:hydrolase activity, hydrolyzing O-glycosyl compounds(GO:0004553); molecular function:hydrolase activity, acting on glycosyl bonds(GO:0016798)	LOC18792336	9.43414153029644	8.97505085031672e-72	2.26694826060917e-70	UP	major allergen Pru ar 1		biological process:response to biotic stimulus(GO:0009607); biological process:defense response(GO:0006952); biological process:response to stress(GO:0006950)	LOC18769425	-4.7888385993356
LOC18793503	4.2781710803201	6.47511758922882e-31	1.15597537415129e-28	UP	3-ketoacyl-CoA synthase 10	pper04626:Plant-pathogen interaction; pper00062:Fatty acid elongation	biological process:fatty acid biosynthetic process(GO:0006633); biological process:fatty acid metabolic process(GO:0006631); biological process:monocarboxylic acid biosynthetic process(GO:0072330); biological process:lipid biosynthetic process(GO:0008610); biological process:monocarboxylic acid metabolic process(GO:0032787); biological process:cellular lipid metabolic process(GO:0044255); biologi…	LOC18770382	5.43720396896372	0.000978231206072418	0.00256837315109669	UP	probable disease resistance protein At5g45490		molecular function:ADP binding(GO:0043531)	LOC18782848	-5.5166702447421	0.000232604059565108	0.00085018729622253	DOWN	AAA-ATPase ASD, mitochondrial			LOC18767703	5.20789190578091	0.000162907113878525	0.0011235474348807	UP	trihelix transcription factor GT-2			LOC18791116	6.66334133065952	2.15733366438516e-06	1.1788197932979e-05	UP	probable sarcosine oxidase	pper00260:Glycine, serine and threonine metabolism; pper00310:Lysine degradation; pper04146:Peroxisome		LOC18791427	9.43317368485389	5.97141677309988e-128	2.45692727229852e-126	UP	endochitinase EP3	pper00520:Amino sugar and nucleotide sugar metabolism	biological process:aminoglycan catabolic process(GO:0006026); biological process:chitin metabolic process(GO:0006030); biological process:chitin catabolic process(GO:0006032); biological process:amino sugar metabolic process(GO:0006040); biological process:cell wall macromolecule catabolic process(GO:0016998); biological process:cell wall macromolecule metabolic process(GO:0044036); biological pr…	LOC18773525	4.78594203158447
LOC18777969	4.27797998853732	2.85897856999728e-44	1.12520299765097e-41	UP	bidirectional sugar transporter SWEET4			LOC18776363	-5.42263082670604	0	0	DOWN	endoglucanase CX		biological process:carbohydrate metabolic process(GO:0005975); molecular function:hydrolase activity, acting on glycosyl bonds(GO:0016798); molecular function:hydrolase activity, hydrolyzing O-glycosyl compounds(GO:0004553)	LOC18788166	5.50346034012272	5.52293399784151e-05	0.000225192133111552	UP	flavonol synthase/flavanone 3-hydroxylase	pper00941:Flavonoid biosynthesis		LOC18776867	5.20749232243825	1.71061871488986e-10	3.95666776095527e-09	UP	cytochrome P450 86A22	pper00073:Cutin, suberine and wax biosynthesis	molecular function:iron ion binding(GO:0005506); molecular function:heme binding(GO:0020037); molecular function:tetrapyrrole binding(GO:0046906); molecular function:cofactor binding(GO:0048037); molecular function:oxidoreductase activity, acting on paired donors, with incorporation or reduction of molecular oxygen(GO:0016705)	LOC18775172	6.62607489589837	2.87487277870359e-06	1.54308919535384e-05	UP	isoleucine N-monooxygenase 2		molecular function:tetrapyrrole binding(GO:0046906); molecular function:heme binding(GO:0020037); molecular function:oxidoreductase activity, acting on paired donors, with incorporation or reduction of molecular oxygen(GO:0016705); molecular function:iron ion binding(GO:0005506)	LOC18776031	9.43137095247404	8.12891700493285e-15	5.9778602770606e-14	UP	cytochrome P450 71A1		molecular function:oxidoreductase activity, acting on paired donors, with incorporation or reduction of molecular oxygen(GO:0016705); molecular function:heme binding(GO:0020037); molecular function:tetrapyrrole binding(GO:0046906); molecular function:iron ion binding(GO:0005506)	LOC18771088	-4.75886473055104
LOC18791681	4.27522577333418	0.00486776941806699	0.0211001659606173	UP	basic leucine zipper 4		molecular function:DNA-binding transcription factor activity(GO:0003700); molecular function:transcription regulator activity(GO:0140110); molecular function:sequence-specific DNA binding(GO:0043565)	LOC18782522	-5.37445776052771	0	0	DOWN	thaumatin-like protein 1			LOC18772448	-5.5000570635637	0	0	DOWN	dnaJ homolog subfamily B member 1		biological process:protein folding(GO:0006457); molecular function:unfolded protein binding(GO:0051082)	LOC18786749	5.20253888252175	0.00023772033690451	0.00153869418941795	UP	cytochrome P450 86A8	pper00073:Cutin, suberine and wax biosynthesis	molecular function:iron ion binding(GO:0005506); molecular function:heme binding(GO:0020037); molecular function:tetrapyrrole binding(GO:0046906); molecular function:cofactor binding(GO:0048037); molecular function:oxidoreductase activity, acting on paired donors, with incorporation or reduction of molecular oxygen(GO:0016705)	LOC18774496	6.58012521538583	6.16624302251156e-06	3.18163244837084e-05	UP	cytochrome P450 81E8		molecular function:tetrapyrrole binding(GO:0046906); molecular function:heme binding(GO:0020037); molecular function:oxidoreductase activity, acting on paired donors, with incorporation or reduction of molecular oxygen(GO:0016705); molecular function:iron ion binding(GO:0005506)	LOC18779868	9.43008754242216	0	0	UP	probable inactive 2-oxoglutarate-dependent dioxygenase AOP2			LOC18767894	4.75756573055505
LOC18776508	4.26404255549973	0.000740923510797404	0.00445196822917372	UP	probable WRKY transcription factor 15		molecular function:DNA-binding transcription factor activity(GO:0003700); molecular function:transcription regulator activity(GO:0140110); molecular function:sequence-specific DNA binding(GO:0043565)	LOC18780367	-5.32265941969069	0.000165213268486143	0.000491216565760315	DOWN	U-box domain-containing protein 7			LOC18793860	5.49390035088293	0.000392665273085772	0.00137026751042014	UP	glucan endo-1,3-beta-glucosidase, basic vacuolar isoform		biological process:carbohydrate metabolic process(GO:0005975); molecular function:hydrolase activity, acting on glycosyl bonds(GO:0016798); molecular function:hydrolase activity, hydrolyzing O-glycosyl compounds(GO:0004553)	LOC18779462	5.19681433934832	0.00162092794081663	0.00783676142519852	UP	epidermis-specific secreted glycoprotein EP1			LOC18790310	6.53348822415217	1.63314347901317e-12	1.52499741554946e-11	UP	transcription factor MYB62			LOC18780213	9.4099414327665	9.32759345160629e-20	8.57591579933832e-19	UP	MLO-like protein 12		biological process:defense response(GO:0006952); biological process:response to stress(GO:0006950)	LOC18786749	4.74912210374896
LOC18783148	4.19335393906431	0.000779798587884669	0.00465647315393062	UP	palmitoyl-monogalactosyldiacylglycerol delta-7 desaturase, chloroplastic		biological process:lipid metabolic process(GO:0006629)	LOC18791207	5.30270029283943	0.00124574265328068	0.00320597302980383	UP	uncharacterized LOC18791207		biological process:proteolysis(GO:0006508); molecular function:serine-type carboxypeptidase activity(GO:0004185); molecular function:carboxypeptidase activity(GO:0004180); molecular function:serine-type exopeptidase activity(GO:0070008); molecular function:serine-type peptidase activity(GO:0008236); molecular function:serine hydrolase activity(GO:0017171); molecular function:exopeptidase activity…	LOC109950142	-5.48579809250729	1.39705525164103e-06	7.20515178207118e-06	DOWN	cysteine-rich and transmembrane domain-containing protein A-like			LOC18785990	5.19595918383057	3.55105427791005e-08	5.8107269955093e-07	UP	receptor-like protein 2			LOC18768324	6.51589111683551	1.57117695465862e-05	7.61759432982153e-05	UP	WAT1-related protein At1g44800			LOC18791845	9.40990776166424	1.48152814690384e-14	1.07300162802044e-13	UP	ABC transporter B family member 11	pper02010:ABC transporters	biological process:transmembrane transport(GO:0055085); molecular function:transporter activity(GO:0005215); molecular function:transmembrane transporter activity(GO:0022857); molecular function:ATPase activity, coupled to transmembrane movement of substances(GO:0042626); molecular function:ATPase activity, coupled to movement of substances(GO:0043492); molecular function:ATPase activity(GO:00168…	LOC109947059	4.74685442673272
LOC18767042	4.19297164991535	4.7158446790387e-05	0.000420083756722804	UP	probable methionine--tRNA ligase	pper00450:Selenocompound metabolism; pper00970:Aminoacyl-tRNA biosynthesis	biological process:oxoacid metabolic process(GO:0043436); biological process:organic acid metabolic process(GO:0006082); biological process:carboxylic acid metabolic process(GO:0019752); biological process:small molecule metabolic process(GO:0044281); biological process:tRNA aminoacylation for protein translation(GO:0006418); biological process:amino acid activation(GO:0043038); biological proces…	LOC109950158	5.30209713755228	0.00399706343632092	0.00938145836349723	UP	uncharacterized LOC109950158			PrpeC_t002	-5.47247657927247	0.00094995067427801	0.00307506829211575	DOWN				LOC18780598	5.18997584848233	1.59965444167811e-12	4.93976624203621e-11	UP	epidermis-specific secreted glycoprotein EP1			LOC18770352	6.51495033765114	1.28104867777463e-74	7.31911002921874e-73	UP	IQ domain-containing protein IQM1			LOC18789036	9.38879688050104	3.6218612874217e-14	2.58505374305538e-13	UP	glu S.griseus protease inhibitor		biological process:response to stress(GO:0006950); molecular function:enzyme inhibitor activity(GO:0004857); molecular function:enzyme regulator activity(GO:0030234); molecular function:molecular function regulator(GO:0098772)	LOC18775269	4.73990696951962
LOC18772321	4.11940251122342	0.00129423456253739	0.00707457699477905	UP	ankyrin repeat-containing protein At5g02620			LOC18783603	5.29546294080651	0.00187239190867347	0.00466086935825497	UP	cinnamoyl-CoA reductase 1	pper00940:Phenylpropanoid biosynthesis	molecular function:coenzyme binding(GO:0050662)	LOC18790053	5.47068340025656	0.000419061969083233	0.0014549614870364	UP	non-specific lipid transfer protein GPI-anchored 2			LOC18777574	5.17740702970047	0.00131113221663825	0.00654535749013317	UP	uncharacterized LOC18777574			LOC18784464	6.48887190332019	2.14976587860847e-05	0.000102198151796164	UP	hydroxyproline-rich systemin			LOC18774006	9.38572537200542	6.33669165931042e-15	4.69214472785909e-14	UP	non-specific lipid-transfer protein 1-like			LOC18786238	4.73860900035867
LOC18774218	4.11631721271731	4.18826515983802e-06	4.98818347819223e-05	UP	protein YLS3			LOC18774452	5.28911390061333	0.0015795279869992	0.00398556311244848	UP	cytochrome P450 714A1		molecular function:tetrapyrrole binding(GO:0046906); molecular function:heme binding(GO:0020037); molecular function:iron ion binding(GO:0005506); molecular function:oxidoreductase activity, acting on paired donors, with incorporation or reduction of molecular oxygen(GO:0016705)	LOC109950264	5.45488374668935	0.000468292492362286	0.0016120614282532	UP	uncharacterized LOC109950264			LOC18792429	5.16809059217308	8.54270713940638e-08	1.29871052896258e-06	UP	uncharacterized LOC18792429		molecular function:carbohydrate binding(GO:0030246); molecular function:pattern binding(GO:0001871); molecular function:polysaccharide binding(GO:0030247)	LOC18788873	-6.48518118812685	6.42822705492227e-10	4.9602374364275e-09	DOWN	probable pectate lyase 5	pper00040:Pentose and glucuronate interconversions		LOC18770782	9.37520663794427	1.4900917812174e-14	1.0787742489339e-13	UP	ethylene-responsive transcription factor 2		molecular function:DNA-binding transcription factor activity(GO:0003700); molecular function:transcription regulator activity(GO:0140110)	LOC18775423	4.73710926986948
LOC18786441	4.10774858220411	8.33440968567393e-15	4.02024993110907e-13	UP	protein ECERIFERUM 1	pper00073:Cutin, suberine and wax biosynthesis	biological process:fatty acid biosynthetic process(GO:0006633); biological process:fatty acid metabolic process(GO:0006631); biological process:monocarboxylic acid biosynthetic process(GO:0072330); biological process:lipid biosynthetic process(GO:0008610); biological process:monocarboxylic acid metabolic process(GO:0032787); biological process:cellular lipid metabolic process(GO:0044255); biologi…	LOC18791283	5.27286503975798	0.00470036907469384	0.0108735010324319	UP	glutamate receptor 2.7		molecular function:transmembrane transporter activity(GO:0022857); molecular function:transporter activity(GO:0005215); molecular function:ion channel activity(GO:0005216); molecular function:channel activity(GO:0015267); molecular function:passive transmembrane transporter activity(GO:0022803); molecular function:substrate-specific channel activity(GO:0022838); molecular function:ion transmembra…	LOC18778726	5.44536149311857	7.23478258160868e-09	4.83141569574398e-08	UP	protein SRG1			LOC18776321	5.1668708248383	0.00131260187467856	0.00655085565233095	UP	uncharacterized LOC18776321			LOC18772734	6.45105055575853	1.69776127935276e-12	1.58376271801459e-11	UP	F-box protein At1g30790			LOC18781252	9.36534082979788	1.27887911355293e-14	9.28821707630731e-14	UP	receptor-like protein 12			LOC18785199	4.71174544020263
LOC18770674	4.09910241023005	0.00104589157913452	0.00589765694427631	UP	heat shock cognate 70 kDa protein	pper04141:Protein processing in endoplasmic reticulum; pper04144:Endocytosis; pper03040:Spliceosome		LOC18792738	5.25735785212432	0.000153856529616521	0.000460016229656318	UP	UPF0481 protein At3g47200			LOC18782260	5.43610080748965	0.000614175281195973	0.00206502501807012	UP	uncharacterized LOC18782260			LOC18769570	5.1072774751192	3.64513952512636e-18	1.83671662134341e-16	UP	patatin-like protein 3		biological process:lipid metabolic process(GO:0006629)	LOC18779967	6.4313570285937	7.22774885262054e-25	1.22839055318904e-23	UP	cysteine-rich receptor-like protein kinase 10			LOC18790679	9.36196102333357	3.37702735765517e-88	1.01344256644087e-86	UP	ethylene-responsive transcription factor 1B	pper04016:MAPK signaling pathway - plant; pper04075:Plant hormone signal transduction	molecular function:DNA-binding transcription factor activity(GO:0003700); molecular function:transcription regulator activity(GO:0140110)	LOC18785990	4.67460676285238
LOC18785426	4.09431343654441	0.00150690554996965	0.00803915077289726	UP	3-ketoacyl-CoA synthase 19	pper04626:Plant-pathogen interaction; pper00062:Fatty acid elongation	biological process:fatty acid biosynthetic process(GO:0006633); biological process:fatty acid metabolic process(GO:0006631); biological process:monocarboxylic acid biosynthetic process(GO:0072330); biological process:lipid biosynthetic process(GO:0008610); biological process:monocarboxylic acid metabolic process(GO:0032787); biological process:cellular lipid metabolic process(GO:0044255); biologi…	LOC18789643	5.25080164095829	0.000270262566895301	0.000778731847191604	UP	transcription factor MYB14			LOC18768968	-5.43341765225793	0.000572974075133396	0.00193566182400338	DOWN	rho GTPase-activating protein 2		biological process:cell communication(GO:0007154); biological process:signal transduction(GO:0007165); biological process:signaling(GO:0023052); biological process:cellular response to stimulus(GO:0051716)	LOC18782277	5.09346977462507	0.00155304745047739	0.00754755601137741	UP	cytochrome P450 85A		molecular function:iron ion binding(GO:0005506); molecular function:heme binding(GO:0020037); molecular function:tetrapyrrole binding(GO:0046906); molecular function:cofactor binding(GO:0048037); molecular function:oxidoreductase activity, acting on paired donors, with incorporation or reduction of molecular oxygen(GO:0016705)	LOC18783056	6.42376209495318	2.44377147710208e-131	3.6456803535784e-129	UP	uncharacterized LOC18783056			LOC18778795	9.3578753891467	1.49943942999502e-14	1.08510964878191e-13	UP	putative methyltransferase DDB_G0268948		molecular function:transferase activity, transferring one-carbon groups(GO:0016741); molecular function:methyltransferase activity(GO:0008168)	LOC18771849	4.65551489029654
LOC18793759	4.09360573100434	0.0109601501723544	0.0407114801661649	UP	cytokinin dehydrogenase 5	pper00908:Zeatin biosynthesis	biological process:amine metabolic process(GO:0009308); biological process:regulation of biological quality(GO:0065008); molecular function:flavin adenine dinucleotide binding(GO:0050660); molecular function:cofactor binding(GO:0048037); molecular function:coenzyme binding(GO:0050662); molecular function:oxidoreductase activity, acting on CH-OH group of donors(GO:0016614); molecular function:oxid…	LOC18776015	5.23483421320119	0.000318767600485811	0.000907007339067222	UP	exocyst complex component EXO70B1		biological process:exocytosis(GO:0006887); biological process:secretion by cell(GO:0032940); biological process:secretion(GO:0046903); biological process:vesicle-mediated transport(GO:0016192); cellular component:cytoplasmic part(GO:0044444); cellular component:cell periphery(GO:0071944); cellular component:exocyst(GO:0000145); cellular component:cell cortex(GO:0005938); cellular component:cell c…	LOC18777725	-5.41003314424528	7.92920400564177e-49	3.15686066019009e-47	DOWN	uncharacterized LOC18777725			LOC18771373	-5.09236983909846	0.00725938809919693	0.0271323253037226	DOWN	bark storage protein A		biological process:nucleoside metabolic process(GO:0009116); biological process:glycosyl compound metabolic process(GO:1901657); biological process:carbohydrate derivative metabolic process(GO:1901135); biological process:small molecule metabolic process(GO:0044281); biological process:nucleobase-containing small molecule metabolic process(GO:0055086)	LOC18789812	6.4236720840689	8.46709776556526e-06	4.28068952929882e-05	UP	12-oxophytodienoate reductase 2	pper00592:alpha-Linolenic acid metabolism	molecular function:FMN binding(GO:0010181); molecular function:coenzyme binding(GO:0050662)	LOC18793348	9.35090229818589	1.2141089482202e-14	8.84252516312876e-14	UP	auxin-responsive protein SAUR32		biological process:response to auxin(GO:0009733); biological process:response to chemical(GO:0042221); biological process:response to endogenous stimulus(GO:0009719); biological process:response to hormone(GO:0009725); biological process:response to organic substance(GO:0010033)	LOC18770674	4.64453335588339
LOC18787317	-4.05927037103381	1.69112244081946e-07	2.70908115704631e-06	DOWN	dehydration-responsive element-binding protein 1A		molecular function:DNA-binding transcription factor activity(GO:0003700); molecular function:transcription regulator activity(GO:0140110)	LOC18785541	-5.21296105255639	0.000255419771825369	0.000738129907519503	DOWN	NAC domain-containing protein 86			LOC18793845	-5.39934864887503	0.000816518736856806	0.00267412632635786	DOWN	berberine bridge enzyme-like 17		molecular function:cofactor binding(GO:0048037); molecular function:flavin adenine dinucleotide binding(GO:0050660); molecular function:coenzyme binding(GO:0050662); molecular function:oxidoreductase activity, acting on CH-OH group of donors(GO:0016614)	LOC18784790	-5.08987627520984	1.92798549286633e-59	7.45501694817682e-57	DOWN	polygalacturonase	pper00040:Pentose and glucuronate interconversions	biological process:carbohydrate metabolic process(GO:0005975); molecular function:hydrolase activity, acting on glycosyl bonds(GO:0016798); molecular function:hydrolase activity, hydrolyzing O-glycosyl compounds(GO:0004553); molecular function:polygalacturonase activity(GO:0004650)	LOC109948875	6.40093636339202	1.06764935302122e-14	1.14546831556735e-13	UP	putative wall-associated receptor kinase-like 16		molecular function:pattern binding(GO:0001871); molecular function:polysaccharide binding(GO:0030247); molecular function:carbohydrate binding(GO:0030246); molecular function:calcium ion binding(GO:0005509)	LOC18769609	9.34337163792939	9.31162783391205e-303	1.01401954363787e-300	UP	calcium-dependent protein kinase 26	pper04626:Plant-pathogen interaction	molecular function:calcium ion binding(GO:0005509)	LOC18790943	4.6335284247065
LOC18789132	4.05012341514792	0.00958114706644426	0.0365696988648039	UP	MADS-box protein CMB1		cellular component:nucleus(GO:0005634); molecular function:DNA-binding transcription factor activity(GO:0003700); molecular function:transcription regulator activity(GO:0140110); molecular function:protein dimerization activity(GO:0046983)	PrpeC_p017	5.19793638562955	1.56469500647959e-138	1.06542024583539e-136	UP		pper00195:Photosynthesis	biological process:photosynthesis(GO:0015979); biological process:photosynthesis, light reaction(GO:0019684); biological process:electron transport chain(GO:0022900); biological process:generation of precursor metabolites and energy(GO:0006091); cellular component:photosynthetic membrane(GO:0034357); cellular component:photosystem(GO:0009521); cellular component:thylakoid(GO:0009579); cellular co…	LOC18788297	-5.39839084309261	1.9342657589826e-117	2.09935595751997e-115	DOWN	cell number regulator 10			LOC18771397	5.08772267164719	0.00237911658952838	0.0108256195389975	UP	uncharacterized protein At3g28850		biological process:cellular homeostasis(GO:0019725); biological process:homeostatic process(GO:0042592); biological process:cell redox homeostasis(GO:0045454); biological process:regulation of biological quality(GO:0065008); molecular function:electron transfer activity(GO:0009055); molecular function:disulfide oxidoreductase activity(GO:0015036); molecular function:oxidoreductase activity, actin…	LOC18793948	6.37256269617674	2.25299870104924e-05	0.000106593547907431	UP	mitogen-activated protein kinase kinase 9	pper04016:MAPK signaling pathway - plant		LOC18770766	9.33493964008537	9.22415137736001e-15	6.75323739728942e-14	UP	protein DMR6-LIKE OXYGENASE 1			LOC18788605	4.62560264756024
LOC18778519	4.0201566829902	0.0108765768542516	0.0405053078247474	UP	spermidine coumaroyl-CoA acyltransferase		molecular function:transferase activity, transferring acyl groups other than amino-acyl groups(GO:0016747); molecular function:transferase activity, transferring acyl groups(GO:0016746)	LOC18774970	-5.18855562570952	1.35527750112143e-13	9.13160431145628e-13	DOWN	UNC93-like protein 3			LOC109949855	5.39482304331163	0.000109661447661277	0.000424882007309721	UP	uncharacterized LOC109949855			LOC18770352	5.07464323963533	1.42608467055087e-27	1.29417183852492e-25	UP	IQ domain-containing protein IQM1			LOC18793271	6.36320111542996	7.89601721108172e-05	0.000342616425477154	UP	patatin-like protein 2		biological process:lipid metabolic process(GO:0006629)	LOC109946413	9.33065512566745	7.51100191403676e-15	5.54138258858712e-14	UP	probable WRKY transcription factor 50		molecular function:DNA-binding transcription factor activity(GO:0003700); molecular function:transcription regulator activity(GO:0140110); molecular function:sequence-specific DNA binding(GO:0043565)	LOC18774560	4.61854813506659
LOC18766832	4.01271449899835	0.00349519979409433	0.0160547413353664	UP	probable disease resistance protein At1g58602		molecular function:ADP binding(GO:0043531)	LOC18774669	5.18529199269432	0.00279724222794845	0.00675716357658443	UP	phosphoinositide phospholipase C 2	pper00562:Inositol phosphate metabolism; pper04070:Phosphatidylinositol signaling system	biological process:lipid metabolic process(GO:0006629); biological process:intracellular signal transduction(GO:0035556); biological process:cell communication(GO:0007154); biological process:signal transduction(GO:0007165); biological process:signaling(GO:0023052); biological process:cellular response to stimulus(GO:0051716); molecular function:hydrolase activity, acting on ester bonds(GO:001678…	LOC109948032	5.39332255795101	0.000677737034699978	0.00225383276176574	UP	uncharacterized LOC109948032		biological process:DNA metabolic process(GO:0006259)	LOC18785939	5.06041661605663	0.00219981462016875	0.0101902667153864	UP	LOB domain-containing protein 15			LOC18780187	6.31889667766945	2.58899953719981e-05	0.000121420719313236	UP	ribonuclease 3-like protein 2		biological process:RNA processing(GO:0006396); molecular function:ribonuclease III activity(GO:0004525); molecular function:double-stranded RNA-specific ribonuclease activity(GO:0032296); molecular function:ribonuclease activity(GO:0004540); molecular function:endoribonuclease activity, producing 5'-phosphomonoesters(GO:0016891); molecular function:endonuclease activity, active with either ribo- …	LOC109946427	9.32948225373338	2.12570402192751e-119	8.24265529696669e-118	UP	major allergen Pru ar 1-like		biological process:response to biotic stimulus(GO:0009607); biological process:defense response(GO:0006952); biological process:response to stress(GO:0006950)	LOC18771596	4.60557298066377
LOC18785066	-4.00693133285599	6.90023602100019e-249	1.1949138717566e-244	DOWN	17.8 kDa class I heat shock protein	pper04141:Protein processing in endoplasmic reticulum		LOC18793845	-5.18129655635127	2.76876353937184e-40	4.67482546190592e-39	DOWN	berberine bridge enzyme-like 17		molecular function:flavin adenine dinucleotide binding(GO:0050660); molecular function:oxidoreductase activity, acting on CH-OH group of donors(GO:0016614); molecular function:coenzyme binding(GO:0050662)	PrpeC_p016	-5.38741995072184	1.31994697373442e-05	5.94288164636686e-05	DOWN		pper00195:Photosynthesis	biological process:photosynthesis(GO:0015979); biological process:photosynthesis, light reaction(GO:0019684); biological process:electron transport chain(GO:0022900); biological process:generation of precursor metabolites and energy(GO:0006091); molecular function:electron transfer activity(GO:0009055)	LOC18777000	-5.05947523801821	0.0031509906441571	0.0136068634590003	DOWN	auxin-responsive protein SAUR36	pper04075:Plant hormone signal transduction	biological process:response to chemical(GO:0042221); biological process:response to auxin(GO:0009733); biological process:response to endogenous stimulus(GO:0009719); biological process:response to hormone(GO:0009725); biological process:response to organic substance(GO:0010033)	LOC18779995	6.31656051604031	6.67797857497243e-102	6.00602695089745e-100	UP	alpha carbonic anhydrase 7	pper00910:Nitrogen metabolism		LOC18773905	9.32649583081456	3.98631809795892e-24	4.32807050325259e-23	UP	F-box protein At2g27310			LOC18766943	4.57378062168713
LOC18779911	3.99496872054841	0.000171852841498444	0.00128830114988249	UP	transcription factor bHLH112		molecular function:protein dimerization activity(GO:0046983)	LOC18778393	-5.17581916190449	2.34594527910608e-06	8.77471954135568e-06	DOWN	epidermis-specific secreted glycoprotein EP1			LOC18776780	5.3766077401626	1.29784286810644e-08	8.46678502011243e-08	UP	uncharacterized LOC18776780			LOC18785066	-5.04935295645119	5.18700462355346e-212	1.84522502478291e-208	DOWN	17.8 kDa class I heat shock protein	pper04141:Protein processing in endoplasmic reticulum		LOC18767537	-6.30692398839129	1.71306193687064e-36	4.32220472850435e-35	DOWN	stearoyl-[acyl-carrier-protein] 9-desaturase 6, chloroplastic	pper00061:Fatty acid biosynthesis; pper01040:Biosynthesis of unsaturated fatty acids; pper01212:Fatty acid metabolism	biological process:lipid metabolic process(GO:0006629); biological process:fatty acid metabolic process(GO:0006631); biological process:monocarboxylic acid metabolic process(GO:0032787); biological process:cellular lipid metabolic process(GO:0044255); biological process:oxoacid metabolic process(GO:0043436); biological process:organic acid metabolic process(GO:0006082); biological process:carboxy…	LOC18776473	9.31500334367258	0	0	UP	uncharacterized LOC18776473			LOC109946630	-4.56943352595654
LOC18771728	-3.97972289596839	0.000978302848174533	0.00560041997416145	DOWN	ethylene-responsive transcription factor ERF017		molecular function:DNA-binding transcription factor activity(GO:0003700); molecular function:transcription regulator activity(GO:0140110)	LOC18771649	5.17092503287924	0.00628934589870619	0.0141288773548659	UP	probable aspartyl protease At4g16563			LOC18778949	-5.32645598504716	2.85692213839913e-06	1.40984515604753e-05	DOWN	glycine-rich protein DC9.1			LOC109948484	-5.03524486835054	0.0035864710107254	0.0151995615601079	DOWN	uncharacterized LOC109948484			LOC18767587	6.29237075291082	1.41562150865335e-170	3.97155783554582e-168	UP	uncharacterized LOC18767587			LOC18775797	9.31135725913405	1.1552500691044e-95	3.69233352490906e-94	UP	expansin-like B1			LOC109949084	4.56077824972703
LOC18767970	-3.96640281501267	0.0060747576187861	0.0252512188392988	DOWN	sorbitol dehydrogenase	pper00040:Pentose and glucuronate interconversions; pper00051:Fructose and mannose metabolism		LOC109949525	5.16271508250557	0.00231820146136745	0.00567519809273487	UP	G-type lectin S-receptor-like serine/threonine-protein kinase LECRK3		biological process:reproduction(GO:0000003); biological process:reproductive process(GO:0022414); biological process:multi-organism process(GO:0051704); biological process:cell recognition(GO:0008037); biological process:pollination(GO:0009856); biological process:pollen-pistil interaction(GO:0009875); biological process:multi-multicellular organism process(GO:0044706); biological process:recogni…	LOC18775681	-5.32052819951692	0.000116929332057258	0.000450582500736244	DOWN	cellulose synthase-like protein G3		biological process:cellular carbohydrate metabolic process(GO:0044262); biological process:cellulose metabolic process(GO:0030243); biological process:cellulose biosynthetic process(GO:0030244); biological process:cellular glucan metabolic process(GO:0006073); biological process:glucan metabolic process(GO:0044042); biological process:cellular polysaccharide metabolic process(GO:0044264); biologi…	LOC18770674	5.01246319671913	2.25774123095926e-05	0.000202922906897789	UP	heat shock cognate 70 kDa protein	pper04141:Protein processing in endoplasmic reticulum; pper04144:Endocytosis; pper03040:Spliceosome		LOC18771397	6.28741119224074	3.71880494314202e-34	8.71600704691278e-33	UP	uncharacterized protein At3g28850		biological process:cellular homeostasis(GO:0019725); biological process:homeostatic process(GO:0042592); biological process:cell redox homeostasis(GO:0045454); biological process:regulation of biological quality(GO:0065008); molecular function:electron transfer activity(GO:0009055); molecular function:oxidoreductase activity, acting on a sulfur group of donors(GO:0016667); molecular function:disu…	LOC18791994	9.30532523531103	0	0	UP	cytochrome P450 CYP749A22		molecular function:oxidoreductase activity, acting on paired donors, with incorporation or reduction of molecular oxygen(GO:0016705); molecular function:heme binding(GO:0020037); molecular function:tetrapyrrole binding(GO:0046906); molecular function:iron ion binding(GO:0005506)	LOC18791681	4.55718179458179
LOC18787243	-3.9615167435269	0.00534303673728987	0.0227302236937742	DOWN	uncharacterized LOC18787243		cellular component:mitochondrion(GO:0005739); cellular component:cytoplasmic part(GO:0044444); molecular function:double-stranded DNA binding(GO:0003690)	LOC18768148	5.16213230940029	0.00297089607957406	0.0071335917833479	UP	myb-related protein 308			PrpeC_t015	-5.31495501739933	0.000216086909444552	0.000795790131172501	DOWN				LOC18785810	-5.01144842226168	0.00404954409220248	0.0168528874047743	DOWN	uncharacterized LOC18785810			LOC18776279	6.26333030042875	1.68377056495034e-05	8.13620444970992e-05	UP	protein TORNADO 2			LOC18772998	9.28746517637189	0	0	UP	7-deoxyloganetic acid glucosyltransferase		molecular function:transferase activity, transferring hexosyl groups(GO:0016758); molecular function:transferase activity, transferring glycosyl groups(GO:0016757)	LOC18773395	4.49579478372321
LOC18774681	3.95748986225127	0.000172122560102588	0.00128920690886528	UP	uncharacterized LOC18774681			LOC18767234	-5.16190636095723	7.57506827196754e-05	0.000236018785487806	DOWN	xyloglucan endotransglucosylase/hydrolase protein 2		biological process:cellular carbohydrate metabolic process(GO:0044262); biological process:cellular glucan metabolic process(GO:0006073); biological process:glucan metabolic process(GO:0044042); biological process:cellular polysaccharide metabolic process(GO:0044264); biological process:polysaccharide metabolic process(GO:0005976); biological process:carbohydrate metabolic process(GO:0005975); ce…	PrpeC_p072	-5.29773556217958	0.00568125853314932	0.0154646398410327	DOWN		pper00190:Oxidative phosphorylation		LOC18774828	-5.01015546962161	8.15187350405125e-09	1.49636092896346e-07	DOWN	heavy metal-associated isoprenylated plant protein 47			LOC18782671	6.25453178127051	6.63002115913637e-301	1.24624507728286e-297	UP	protein C2-DOMAIN ABA-RELATED 4			LOC18770352	9.28638888368853	3.31818990166861e-189	2.09529866499116e-187	UP	IQ domain-containing protein IQM1			LOC18790043	4.48426359730368
LOC18784769	3.93708521169046	1.37348642074407e-07	2.23947242837009e-06	UP	homeobox-leucine zipper protein ATHB-12		molecular function:DNA-binding transcription factor activity(GO:0003700); molecular function:transcription regulator activity(GO:0140110); molecular function:sequence-specific DNA binding(GO:0043565)	LOC18782639	5.1616899433408	0.00599905832368507	0.0135600231578619	UP	leucine-rich repeat receptor-like protein kinase PXC2			LOC18766534	5.27444849034976	0.00161402963276361	0.00498514862104258	UP	uncharacterized protein At4g06744			LOC18766534	5.00362586366018	1.15974005878386e-16	5.13141702129068e-15	UP	uncharacterized protein At4g06744			LOC18780247	6.25119240010725	2.62242968977021e-05	0.000122835312431125	UP	glutamate receptor 2.8		molecular function:transporter activity(GO:0005215); molecular function:ion channel activity(GO:0005216); molecular function:channel activity(GO:0015267); molecular function:passive transmembrane transporter activity(GO:0022803); molecular function:substrate-specific channel activity(GO:0022838); molecular function:transmembrane transporter activity(GO:0022857); molecular function:ionotropic glut…	LOC18769049	9.28361972305076	1.24894168145419e-85	3.6516484596344e-84	UP	late embryogenesis abundant protein At1g64065			LOC18793759	4.48413499339158
LOC18780812	-3.91728331321635	0.00601023816832418	0.0250250767878985	DOWN	stigma-specific STIG1-like protein 1			LOC18785733	-5.16035860399082	0.000312836144745092	0.000892171194208068	DOWN	expansin-B15			LOC18787355	-5.27158377335449	0.000120661133214377	0.000464332816163725	DOWN	LRR receptor-like serine/threonine-protein kinase EFR			LOC18785176	4.98902725055956	0.000424111630937761	0.00251371995317893	UP	uncharacterized LOC18785176			LOC18773846	6.24957443657173	1.092551314655e-06	6.19134370261382e-06	UP	auxin efflux carrier component 5		biological process:transmembrane transport(GO:0055085)	LOC18777737	9.27996601701939	1.00324133076178e-14	7.33907757089045e-14	UP	putative RING-H2 finger protein ATL21A			LOC18793751	4.45772545869847
LOC18787223	3.90237794285324	2.07604313599981e-05	0.000206140131801082	UP	uncharacterized LOC18787223			LOC18793755	-5.1587431102807	7.61478127255383e-05	0.000237137329664558	DOWN	protein PLANT CADMIUM RESISTANCE 7			PrpeC_p052	-5.21844939979592	0.000411439079050575	0.00143109244887156	DOWN		pper00195:Photosynthesis	biological process:electron transport chain(GO:0022900); biological process:generation of precursor metabolites and energy(GO:0006091); biological process:energy derivation by oxidation of organic compounds(GO:0015980); biological process:cellular respiration(GO:0045333); molecular function:electron transfer activity(GO:0009055)	LOC18772551	4.98603150444481	0.00283989953670906	0.0125001962532651	UP	uncharacterized LOC18772551		molecular function:carbohydrate binding(GO:0030246); molecular function:pattern binding(GO:0001871); molecular function:polysaccharide binding(GO:0030247)	LOC18784536	6.24649950689759	2.62817120003863e-05	0.000123073577596229	UP	ABC transporter C family member 3			LOC18778604	9.27589625043315	0	0	UP	berberine bridge enzyme-like 17		molecular function:flavin adenine dinucleotide binding(GO:0050660); molecular function:coenzyme binding(GO:0050662); molecular function:oxidoreductase activity, acting on CH-OH group of donors(GO:0016614)	LOC18791283	4.45163390151045
LOC18790041	-3.88679108430085	5.97477796999717e-06	6.81140422030553e-05	DOWN	uncharacterized LOC18790041			LOC18771367	5.15830985630747	0	0	UP	uncharacterized acetyltransferase At3g50280		molecular function:transferase activity, transferring acyl groups other than amino-acyl groups(GO:0016747); molecular function:transferase activity, transferring acyl groups(GO:0016746)	LOC18767042	-5.21803433847936	0.000210545989777538	0.000777232163303563	DOWN	probable methionine--tRNA ligase	pper00450:Selenocompound metabolism; pper00970:Aminoacyl-tRNA biosynthesis	biological process:ncRNA metabolic process(GO:0034660); biological process:tRNA metabolic process(GO:0006399); biological process:small molecule metabolic process(GO:0044281); biological process:carboxylic acid metabolic process(GO:0019752); biological process:oxoacid metabolic process(GO:0043436); biological process:organic acid metabolic process(GO:0006082); biological process:cellular amino ac…	LOC18781364	4.9794255618352	0.00327120945353352	0.0140543484420292	UP	oxygen-evolving enhancer protein 3, chloroplastic	pper00195:Photosynthesis	biological process:photosynthesis(GO:0015979); cellular component:photosystem(GO:0009521); cellular component:photosystem II oxygen evolving complex(GO:0009654); cellular component:photosynthetic membrane(GO:0034357); cellular component:extrinsic component of membrane(GO:0019898); cellular component:thylakoid membrane(GO:0042651); cellular component:thylakoid(GO:0009579); cellular component:thyla…	LOC18767921	6.24571308970835	6.52209062908773e-14	6.70655019447276e-13	UP	epoxide hydrolase 4			LOC18791316	9.27358102423349	5.71903481160274e-62	1.28880256609427e-60	UP	cytochrome P450 CYP749A22		molecular function:oxidoreductase activity, acting on paired donors, with incorporation or reduction of molecular oxygen(GO:0016705); molecular function:heme binding(GO:0020037); molecular function:tetrapyrrole binding(GO:0046906); molecular function:iron ion binding(GO:0005506)	LOC18792692	4.39358644094855
LOC18778503	-3.88478974952084	0.00489041153996159	0.0211593394490617	DOWN	vegetative cell wall protein gp1			LOC18793748	5.13260844431143	3.16881841786813e-103	1.4490354221119e-101	UP	early light-induced protein 1, chloroplastic			LOC18773652	5.21660140813016	1.54879385441325e-82	1.06417126125814e-80	UP	probable indole-3-acetic acid-amido synthetase GH3.1	pper04075:Plant hormone signal transduction		LOC18770418	4.9781415796754	0.0026850142307991	0.0119455598107112	UP	beta-glucosidase 12		biological process:carbohydrate metabolic process(GO:0005975); molecular function:hydrolase activity, acting on glycosyl bonds(GO:0016798); molecular function:hydrolase activity, hydrolyzing O-glycosyl compounds(GO:0004553)	LOC18777765	6.24558410531531	3.82232193345425e-25	6.56147811718169e-24	UP	uncharacterized LOC18777765			LOC18769562	9.27153375491683	1.47241559847608e-177	8.5824839980404e-176	UP	stellacyanin		molecular function:electron transfer activity(GO:0009055)	LOC18792150	-4.38033424224306
PrpeC_p026	-3.87665207552566	0.00307419960735942	0.0144466525374879	DOWN			molecular function:oxidoreductase activity, acting on NAD(P)H(GO:0016651); molecular function:oxidoreductase activity, acting on NAD(P)H, quinone or similar compound as acceptor(GO:0016655)	LOC109948479	-5.12678197278391	0.00035387705044726	0.00100004303698796	DOWN	uncharacterized LOC109948479			LOC18775323	5.21148712835289	6.16575625728918e-08	3.7323085834532e-07	UP	acid phosphatase 1			LOC18793489	4.97027974105073	0.00267054069555944	0.011907973765835	UP	uncharacterized ATP-dependent helicase C29A10.10c			LOC18792770	6.24176582549975	1.07258574905177e-51	3.98446528160596e-50	UP	nudix hydrolase 1	pper00902:Monoterpenoid biosynthesis		LOC18769069	9.26020248245857	2.14990432133873e-30	2.77685795368367e-29	UP	uncharacterized LOC18769069			LOC18776669	-4.37762921466432
LOC18766852	3.87178358921156	3.81430040712531e-14	1.68500612628033e-12	UP	putative quinone-oxidoreductase homolog, chloroplastic	pper00592:alpha-Linolenic acid metabolism		LOC18790370	5.10104570204002	2.98869496019653e-15	2.20221492386993e-14	UP	low affinity sulfate transporter 3		biological process:sulfate transport(GO:0008272); biological process:sulfur compound transport(GO:0072348); biological process:inorganic anion transport(GO:0015698); biological process:ion transport(GO:0006811); biological process:anion transport(GO:0006820); molecular function:transmembrane transporter activity(GO:0022857); molecular function:sulfate transmembrane transporter activity(GO:0015116…	LOC18767175	-5.19174329288237	0.00152254193942952	0.00472828770692165	DOWN	auxin-responsive protein SAUR21		biological process:response to auxin(GO:0009733); biological process:response to endogenous stimulus(GO:0009719); biological process:response to hormone(GO:0009725); biological process:response to organic substance(GO:0010033); biological process:response to chemical(GO:0042221)	LOC18766541	-4.96873694998112	0.00508425534490277	0.0203771180305961	DOWN	uncharacterized LOC18766541			LOC18781914	6.22054323179896	7.33010672443494e-05	0.000319240074372576	UP	transmembrane protein 97			LOC18779346	9.25981454321687	1.37099274753861e-14	9.93737509236236e-14	UP	calcium-binding protein PBP1		molecular function:calcium ion binding(GO:0005509)	LOC18780184	4.36772809502571
LOC18793667	3.86165216172722	6.38060962800835e-05	0.000550538200937821	UP	kinesin-like protein KIN-7N		biological process:movement of cell or subcellular component(GO:0006928); biological process:microtubule-based movement(GO:0007018); biological process:microtubule-based process(GO:0007017); molecular function:nucleoside-triphosphatase activity(GO:0017111); molecular function:pyrophosphatase activity(GO:0016462); molecular function:hydrolase activity, acting on acid anhydrides, in phosphorus-cont…	LOC18774650	-5.09663614237047	0.000388422983655163	0.0010902373410643	DOWN	isoflavone 3'-hydroxylase		molecular function:tetrapyrrole binding(GO:0046906); molecular function:heme binding(GO:0020037); molecular function:iron ion binding(GO:0005506); molecular function:oxidoreductase activity, acting on paired donors, with incorporation or reduction of molecular oxygen(GO:0016705)	LOC109949222	5.1836898417789	0.00243003577218005	0.00721013574054468	UP	golgin candidate 5-like			LOC18774371	4.89614657025865	0.00431021999385914	0.017775535133497	UP	uncharacterized LOC18774371			LOC18785574	6.19765520827242	2.89010881683467e-05	0.000134269341151857	UP	CEN-like protein 1			LOC18768766	9.25836174204763	0	0	UP	allene oxide synthase 1, chloroplastic	pper00592:alpha-Linolenic acid metabolism	molecular function:oxidoreductase activity, acting on paired donors, with incorporation or reduction of molecular oxygen(GO:0016705); molecular function:heme binding(GO:0020037); molecular function:tetrapyrrole binding(GO:0046906); molecular function:iron ion binding(GO:0005506)	LOC18790063	4.30767422216433
LOC18781395	3.85609667909502	6.12971377713731e-08	1.07112263853367e-06	UP	protein PHLOEM PROTEIN 2-LIKE A1			LOC18792347	-5.07300672650626	0.000426850680046329	0.00119075256244383	DOWN	MLP-like protein 34		biological process:response to biotic stimulus(GO:0009607); biological process:defense response(GO:0006952); biological process:response to stress(GO:0006950)	LOC18788480	-5.17801535500661	0.00173911633100869	0.00532899519517857	DOWN	EPIDERMAL PATTERNING FACTOR-like protein 2			LOC18783840	4.89493717566824	0.00362825138413957	0.0153510245884136	UP	serine carboxypeptidase-like 25		biological process:proteolysis(GO:0006508); molecular function:serine-type carboxypeptidase activity(GO:0004185); molecular function:carboxypeptidase activity(GO:0004180); molecular function:serine-type exopeptidase activity(GO:0070008); molecular function:exopeptidase activity(GO:0008238); molecular function:serine-type peptidase activity(GO:0008236); molecular function:serine hydrolase activity…	LOC18782524	6.1927152130623	2.6795342934193e-05	0.000125260398192993	UP	tryptophan synthase alpha chain	pper00400:Phenylalanine, tyrosine and tryptophan biosynthesis; pper00260:Glycine, serine and threonine metabolism; pper01230:Biosynthesis of amino acids	biological process:amine metabolic process(GO:0009308); biological process:cellular biogenic amine metabolic process(GO:0006576); biological process:cellular amine metabolic process(GO:0044106); biological process:alpha-amino acid metabolic process(GO:1901605); biological process:aromatic amino acid family metabolic process(GO:0009072); biological process:cellular amino acid metabolic process(GO:…	LOC18775465	9.25599519038975	3.05610039263039e-14	2.18984404020395e-13	UP	probable 2-oxoglutarate-dependent dioxygenase JRG21			LOC18772846	-4.3071196948196
LOC109947613	-3.83889668999249	0.00012375964683619	0.0009737145862164	DOWN	uncharacterized LOC109947613	pper03015:mRNA surveillance pathway		PrpeC_p052	5.0499391918615	1.02123486730402e-133	6.73257205628664e-132	UP		pper00195:Photosynthesis	biological process:electron transport chain(GO:0022900); biological process:energy derivation by oxidation of organic compounds(GO:0015980); biological process:cellular respiration(GO:0045333); biological process:generation of precursor metabolites and energy(GO:0006091); molecular function:electron transfer activity(GO:0009055)	LOC18782417	-5.16310762536466	0.00109963547306911	0.00351421388992829	DOWN	uncharacterized LOC18782417			LOC18774581	4.89210731108122	0.000627170057292363	0.00351021831625527	UP	cytochrome P450 81E8		molecular function:iron ion binding(GO:0005506); molecular function:heme binding(GO:0020037); molecular function:tetrapyrrole binding(GO:0046906); molecular function:cofactor binding(GO:0048037); molecular function:oxidoreductase activity, acting on paired donors, with incorporation or reduction of molecular oxygen(GO:0016705)	LOC18791501	6.17053626460017	3.25034632628982e-05	0.00014971026683477	UP	galactolipase DONGLE, chloroplastic		biological process:lipid metabolic process(GO:0006629)	LOC18777076	9.23491558580659	3.47630873898751e-14	2.48506881789414e-13	UP	uncharacterized LOC18777076			LOC18767703	4.29109608476582
LOC18773697	3.80437393829146	0.00459226080590834	0.0200717264956877	UP	expansin-A6			LOC18768668	5.04857267226024	0.00232451559473728	0.0056876704853788	UP	TMV resistance protein N		biological process:cell communication(GO:0007154); biological process:signal transduction(GO:0007165); biological process:signaling(GO:0023052); biological process:cellular response to stimulus(GO:0051716); molecular function:ADP binding(GO:0043531)	LOC18780620	5.14098800541539	0.00029688563099011	0.0010609708578268	UP	2-alkenal reductase (NADP(+)-dependent)			LOC18782158	4.88335431622434	0.00535161101971235	0.0212144205945227	UP	protein SPIRAL1-like 2			LOC18779784	6.1680375024284	6.25728751653803e-05	0.000275581615389797	UP	uncharacterized protein At4g04980			LOC18791088	9.23278945553531	8.01600920664917e-200	5.33989536381399e-198	UP	cytochrome P450 CYP749A22		molecular function:oxidoreductase activity, acting on paired donors, with incorporation or reduction of molecular oxygen(GO:0016705); molecular function:heme binding(GO:0020037); molecular function:tetrapyrrole binding(GO:0046906); molecular function:iron ion binding(GO:0005506)	LOC18768148	4.27603581694091
LOC18789137	3.79192465320296	1.07429921376273e-13	4.44000942356304e-12	UP	heparan-alpha-glucosaminide N-acetyltransferase	pper00531:Glycosaminoglycan degradation		LOC18777561	5.04728120592159	4.66517986834678e-05	0.000149344991083984	UP	proline transporter 1			LOC18773872	5.12932645382915	0.00200853692348389	0.00607018484060924	UP	kiwellin			LOC18775361	4.87476368986725	2.30600453573258e-10	5.24512821957485e-09	UP	uncharacterized LOC18775361			LOC109950029	6.10651845621649	4.33107935977436e-05	0.000196030095655378	UP	uncharacterized LOC109950029		biological process:proteolysis(GO:0006508); molecular function:peptidase activity, acting on L-amino acid peptides(GO:0070011); molecular function:peptidase activity(GO:0008233); molecular function:cysteine-type peptidase activity(GO:0008234)	LOC18771530	9.23066937492488	1.21485810968236e-183	7.43885844534793e-182	UP	E3 ubiquitin-protein ligase PUB23		biological process:protein ubiquitination(GO:0016567); biological process:protein modification by small protein conjugation(GO:0032446); biological process:protein modification by small protein conjugation or removal(GO:0070647); molecular function:ubiquitin-protein transferase activity(GO:0004842); molecular function:ubiquitin-like protein transferase activity(GO:0019787)	LOC18777969	4.27140429599231
LOC18768674	3.77239675500972	1.28431178300392e-06	1.72006397109659e-05	UP	uncharacterized LOC18768674		molecular function:flavin adenine dinucleotide binding(GO:0050660); molecular function:cofactor binding(GO:0048037); molecular function:coenzyme binding(GO:0050662); molecular function:oxidoreductase activity, acting on CH-OH group of donors(GO:0016614)	LOC18775681	5.03333191538717	1.7473439200333e-23	1.85650316150691e-22	UP	cellulose synthase-like protein G3		biological process:cellular carbohydrate metabolic process(GO:0044262); biological process:cellular glucan metabolic process(GO:0006073); biological process:glucan metabolic process(GO:0044042); biological process:cellular polysaccharide metabolic process(GO:0044264); biological process:polysaccharide metabolic process(GO:0005976); biological process:cellulose metabolic process(GO:0030243); biolo…	LOC109949532	5.12731986659113	0.00200646786452642	0.00606532063358706	UP	uncharacterized LOC109949532			LOC18781899	-4.87378644164906	0.0140155474416377	0.0459021436833751	DOWN	xyloglucan endotransglucosylase/hydrolase 2		biological process:cellular carbohydrate metabolic process(GO:0044262); biological process:cellular glucan metabolic process(GO:0006073); biological process:glucan metabolic process(GO:0044042); biological process:cellular polysaccharide metabolic process(GO:0044264); biological process:polysaccharide metabolic process(GO:0005976); biological process:carbohydrate metabolic process(GO:0005975); ce…	LOC18768804	6.10549593832291	4.58337562794689e-05	0.000206653182246384	UP	protein NRT1/ PTR FAMILY 4.4		molecular function:transporter activity(GO:0005215)	LOC18779607	9.22981009330591	0	0	UP	berberine bridge enzyme-like 17		molecular function:flavin adenine dinucleotide binding(GO:0050660); molecular function:coenzyme binding(GO:0050662); molecular function:oxidoreductase activity, acting on CH-OH group of donors(GO:0016614)	LOC109947521	-4.26682804156644
LOC18789362	3.76986823474036	8.63134998605725e-17	5.37658588879688e-15	UP	protein ECERIFERUM 1		molecular function:transferase activity, transferring acyl groups other than amino-acyl groups(GO:0016747); molecular function:transferase activity, transferring acyl groups(GO:0016746)	LOC18766768	5.02360064412015	0.00540348866864308	0.0123152807342871	UP	probable LRR receptor-like serine/threonine-protein kinase At1g34110			LOC18771773	5.11974961344193	0.000408944044438676	0.0014232856448601	UP	salicylic acid-binding protein 2			LOC18778393	4.86444031838508	8.81827024568718e-05	0.000660980079477615	UP	epidermis-specific secreted glycoprotein EP1			LOC18776594	6.08942447834939	1.39216883679476e-97	1.17876565879419e-95	UP	U-box domain-containing protein 21		biological process:protein ubiquitination(GO:0016567); biological process:protein modification by small protein conjugation(GO:0032446); biological process:protein modification by small protein conjugation or removal(GO:0070647); molecular function:ubiquitin-protein transferase activity(GO:0004842); molecular function:ubiquitin-like protein transferase activity(GO:0019787)	LOC18769379	9.22937056254857	0	0	UP	lysine histidine transporter-like 8			LOC18785270	4.25832815001639
LOC109949353	3.76763255106949	2.05499607480901e-08	3.8892204401604e-07	UP	uncharacterized LOC109949353			PrpeC_p051	5.01990106048849	1.49978067243666e-35	2.3067937350083e-34	UP		pper00195:Photosynthesis	biological process:photosynthesis(GO:0015979); biological process:regulation of biological quality(GO:0065008); cellular component:photosynthetic membrane(GO:0034357); cellular component:photosystem(GO:0009521); cellular component:thylakoid(GO:0009579); cellular component:thylakoid part(GO:0044436); cellular component:photosystem II(GO:0009523); cellular component:membrane protein complex(GO:0098…	LOC18789226	5.11834860488211	0.00193740758015322	0.00587532037120676	UP	non-specific lipid-transfer protein-like protein At2g13820			LOC18793845	4.86383107697859	1.89106655002849e-31	2.15617953367671e-29	UP	berberine bridge enzyme-like 17		molecular function:cofactor binding(GO:0048037); molecular function:oxidoreductase activity, acting on CH-OH group of donors(GO:0016614); molecular function:flavin adenine dinucleotide binding(GO:0050660); molecular function:coenzyme binding(GO:0050662)	LOC18789510	6.0891333433063	6.12159425542955e-05	0.000270175175438622	UP	EG45-like domain containing protein			LOC18774002	9.21683959316733	9.11798809691437e-19	8.06908669248101e-18	UP	non-specific lipid-transfer protein 1-like			LOC18769533	4.23277108844185
LOC18770129	3.76656356286136	0.00509432672543035	0.0218633100134516	UP	STS14 protein			LOC109947542	5.01588909629347	0.00491108672171144	0.0112909605627813	UP	uncharacterized LOC109947542			LOC18776660	5.11311311516457	0.00258748577647517	0.00762683923735285	UP	ethylene-responsive transcription factor ERF115		molecular function:transcription regulator activity(GO:0140110); molecular function:DNA-binding transcription factor activity(GO:0003700)	LOC18772399	4.85383013777415	4.72623096694025e-12	1.364699191704e-10	UP	probable mannitol dehydrogenase			LOC18789643	6.08544756791723	4.04168595041961e-06	2.12984499046923e-05	UP	transcription factor MYB14			LOC18791516	9.21100555189446	0	0	UP	beta-amyrin 28-oxidase		molecular function:oxidoreductase activity, acting on paired donors, with incorporation or reduction of molecular oxygen(GO:0016705); molecular function:heme binding(GO:0020037); molecular function:tetrapyrrole binding(GO:0046906); molecular function:iron ion binding(GO:0005506)	LOC18784588	4.22511200696454
LOC18767070	3.75424265360691	0.004322191975772	0.0190791227235391	UP	gamma-glutamyl peptidase 5			PrpeC_t020	5.01532636326381	0.00392825502345867	0.00923739021586442	UP				LOC18774869	5.08607720513128	0.00202635511367218	0.00611459024915424	UP	cationic peroxidase 1	pper00940:Phenylpropanoid biosynthesis	biological process:response to stress(GO:0006950); biological process:response to oxidative stress(GO:0006979); molecular function:tetrapyrrole binding(GO:0046906); molecular function:heme binding(GO:0020037); molecular function:cofactor binding(GO:0048037); molecular function:peroxidase activity(GO:0004601); molecular function:oxidoreductase activity, acting on peroxide as acceptor(GO:0016684); …	LOC18769374	4.83644195224646	0.0038131590864831	0.0160190507017654	UP	myb-related protein 2			LOC18774577	6.07577718152327	9.70916216880901e-05	0.000413651680161158	UP	E3 ubiquitin-protein ligase PUB23		biological process:protein ubiquitination(GO:0016567); biological process:protein modification by small protein conjugation(GO:0032446); biological process:protein modification by small protein conjugation or removal(GO:0070647); molecular function:ubiquitin-protein transferase activity(GO:0004842); molecular function:ubiquitin-like protein transferase activity(GO:0019787)	LOC18786969	9.20892756716625	9.30794207606698e-217	6.77096938381417e-215	UP	AAA-ATPase At2g46620			LOC18781673	-4.18398894918988
LOC18767803	-3.74594906748324	1.33867919980846e-143	7.72730256769435e-140	DOWN	classical arabinogalactan protein 1			LOC18792328	5.00734704567008	0.00401112952570254	0.00941092097095477	UP	monothiol glutaredoxin-S10		biological process:regulation of biological quality(GO:0065008); biological process:cellular homeostasis(GO:0019725); biological process:homeostatic process(GO:0042592); biological process:cell redox homeostasis(GO:0045454); molecular function:electron transfer activity(GO:0009055); molecular function:oxidoreductase activity, acting on a sulfur group of donors(GO:0016667); molecular function:disu…	LOC18774379	5.0406439824905	1.95192515264889e-13	1.94393948574735e-12	UP	beta-amyrin 28-oxidase		molecular function:tetrapyrrole binding(GO:0046906); molecular function:oxidoreductase activity, acting on paired donors, with incorporation or reduction of molecular oxygen(GO:0016705); molecular function:heme binding(GO:0020037); molecular function:iron ion binding(GO:0005506); molecular function:cofactor binding(GO:0048037)	LOC18792738	-4.83476403479271	0.00703921700629186	0.0264585507411113	DOWN	UPF0481 protein At3g47200			LOC18784666	6.06993683976372	0.000788023796645345	0.00279797569050671	UP	abscisic acid receptor PYL4	pper04016:MAPK signaling pathway - plant; pper04075:Plant hormone signal transduction		LOC18771428	9.20872225039547	2.38579954289974e-14	1.71562477213027e-13	UP	beta-glucosidase 12		biological process:carbohydrate metabolic process(GO:0005975); molecular function:hydrolase activity, hydrolyzing O-glycosyl compounds(GO:0004553); molecular function:hydrolase activity, acting on glycosyl bonds(GO:0016798)	LOC18777019	4.17724521804504
LOC109946611	3.70510723137468	0.000654980273328111	0.00402637323153102	UP	monothiol glutaredoxin-S17-like			LOC18783901	-5.00070087698771	5.00894288665308e-10	2.61623313091508e-09	DOWN	pectate lyase	pper00040:Pentose and glucuronate interconversions		PrpeC_p075	-5.03732826545343	0.000839799684406664	0.00274246581492709	DOWN		pper00190:Oxidative phosphorylation	molecular function:oxidoreductase activity, acting on NAD(P)H(GO:0016651); molecular function:oxidoreductase activity, acting on NAD(P)H, quinone or similar compound as acceptor(GO:0016655)	LOC18788605	4.81813780323392	0.00538710459685459	0.0213246869454478	UP	probable RNA helicase SDE3			LOC18768029	6.06325794101392	2.12792921585624e-122	2.75853003244481e-120	UP	putative quinone-oxidoreductase homolog, chloroplastic	pper00592:alpha-Linolenic acid metabolism		LOC18788207	9.1929214709865	4.2573571626445e-119	1.64382796942363e-117	UP	basic 7S globulin			LOC18786681	4.17059528390103
LOC18779061	3.6922461695662	0.00123401722157942	0.00679258621299773	UP	protochlorophyllide reductase, chloroplastic	pper00860:Porphyrin metabolism		LOC18781252	-4.99957688751933	0.00103673548143298	0.00270636265245489	DOWN	receptor-like protein 12			LOC18786351	5.03186639174103	0.000528064489076607	0.00179856463998908	UP	probable alkaline/neutral invertase F		molecular function:hydrolase activity, acting on glycosyl bonds(GO:0016798); molecular function:hydrolase activity, hydrolyzing O-glycosyl compounds(GO:0004553); molecular function:catalytic activity, acting on a glycoprotein(GO:0140103)	LOC18792023	4.81598210497742	0.00428458582786016	0.0176821178933059	UP	receptor protein kinase CLAVATA1			LOC18791171	6.0470786122172	0.000236518618583122	0.000938931462197876	UP	LRR receptor-like serine/threonine-protein kinase ERECTA			LOC18770986	9.18957838491973	1.17219112606526e-44	1.97566893592426e-43	UP	uncharacterized LOC18770986		biological process:lipid metabolic process(GO:0006629)	LOC18791407	4.14900347371521
LOC18775948	3.68968793252696	0.000113813680282636	0.000904863552056984	UP	germin-like protein subfamily T member 2		molecular function:nutrient reservoir activity(GO:0045735)	LOC18770471	4.99841383945669	0.00513459625315709	0.0117498052612722	UP	B3 domain-containing protein Os12g0591400			LOC109950356	5.02600888363456	1.92680406826809e-05	8.47515263894896e-05	UP	uncharacterized LOC109950356			LOC109949250	-4.80809151612184	0.00751483310307257	0.0278761911166531	DOWN	uncharacterized LOC109949250	pper00650:Butanoate metabolism; pper00290:Valine, leucine and isoleucine biosynthesis; pper01210:2-Oxocarboxylic acid metabolism; pper00770:Pantothenate and CoA biosynthesis; pper01230:Biosynthesis of amino acids		LOC18785981	6.04240222589333	1.38066814951267e-240	9.61200711347766e-238	UP	BON1-associated protein 2			LOC18776068	9.18584080064086	1.29940581796361e-18	1.1443580729049e-17	UP	uncharacterized LOC18776068			LOC18790143	4.12020807639611
LOC18790063	3.68528203412634	2.68673850862779e-05	0.000258766689398817	UP	major allergen Pru ar 1		biological process:response to biotic stimulus(GO:0009607); biological process:defense response(GO:0006952); biological process:response to stress(GO:0006950)	LOC109948484	4.98221698365735	5.6671929062606e-12	3.40634078776108e-11	UP	uncharacterized LOC109948484			PrpeC_p050	-5.02463450311478	0.000940193268169088	0.00304811516164408	DOWN			biological process:photosynthesis(GO:0015979); cellular component:photosynthetic membrane(GO:0034357); cellular component:photosystem(GO:0009521); cellular component:thylakoid(GO:0009579); cellular component:thylakoid part(GO:0044436); cellular component:membrane protein complex(GO:0098796); cellular component:photosystem II(GO:0009523)	LOC18769951	4.80713551835506	0.00475001442632168	0.0192019333184054	UP	flavonoid 3'-monooxygenase		molecular function:iron ion binding(GO:0005506); molecular function:heme binding(GO:0020037); molecular function:tetrapyrrole binding(GO:0046906); molecular function:cofactor binding(GO:0048037); molecular function:oxidoreductase activity, acting on paired donors, with incorporation or reduction of molecular oxygen(GO:0016705)	LOC18769609	6.03714870300582	3.16248942194424e-293	4.95377613869049e-290	UP	calcium-dependent protein kinase 26	pper04626:Plant-pathogen interaction	molecular function:calcium ion binding(GO:0005509)	LOC18792840	9.17558795070689	5.32809553639317e-14	3.77323775018871e-13	UP	uncharacterized LOC18792840		molecular function:transferase activity, transferring acyl groups other than amino-acyl groups(GO:0016747); molecular function:transferase activity, transferring acyl groups(GO:0016746); molecular function:acetyltransferase activity(GO:0016407); molecular function:N-acetyltransferase activity(GO:0008080); molecular function:N-acyltransferase activity(GO:0016410)	LOC18771402	4.10953040936712
LOC18792107	3.66716883293612	0.00557177472997497	0.0235620080583581	UP	serine/threonine-protein kinase BRI1-like 2			LOC18783184	4.96663144327746	1.12596667459136e-120	6.32745790597923e-119	UP	2-methylene-furan-3-one reductase			PrpeC_t019	-5.02341433628887	0.00239500592219097	0.00711611175486208	DOWN				LOC18776924	4.78950003242349	2.8104304775128e-08	4.71326237298969e-07	UP	uncharacterized LOC18776924		molecular function:transferase activity, transferring hexosyl groups(GO:0016758); molecular function:transferase activity, transferring glycosyl groups(GO:0016757); molecular function:UDP-glycosyltransferase activity(GO:0008194); molecular function:acetylglucosaminyltransferase activity(GO:0008375)	LOC18774006	6.02811741179787	4.79532677441583e-40	1.34133567527819e-38	UP	non-specific lipid-transfer protein 1-like			LOC18775529	9.17355150737763	1.51307309380428e-13	1.04626415528231e-12	UP	beta-glucosidase 12		biological process:carbohydrate metabolic process(GO:0005975); molecular function:hydrolase activity, hydrolyzing O-glycosyl compounds(GO:0004553); molecular function:hydrolase activity, acting on glycosyl bonds(GO:0016798)	LOC18785066	-4.09249562787695
LOC18772486	3.65538298266441	0.00667391025026055	0.0273155527780104	UP	nicotianamine synthase	pper00999:Biosynthesis of various plant secondary metabolites; pper00270:Cysteine and methionine metabolism	biological process:organic acid biosynthetic process(GO:0016053); biological process:carboxylic acid biosynthetic process(GO:0046394); biological process:small molecule biosynthetic process(GO:0044283); biological process:amine metabolic process(GO:0009308); biological process:oxoacid metabolic process(GO:0043436); biological process:organic acid metabolic process(GO:0006082); biological process:…	LOC18767870	-4.96060258582347	0.00017032760715251	0.000505616892067523	DOWN	putative indole-3-acetic acid-amido synthetase GH3.9	pper04075:Plant hormone signal transduction		LOC18768125	-5.01697663231085	4.98782084766939e-125	5.94352917792213e-123	DOWN	uncharacterized LOC18768125			LOC18773846	4.78797438685239	0.00643120221309456	0.0245786784277665	UP	auxin efflux carrier component 5		biological process:transmembrane transport(GO:0055085)	LOC18787633	6.00933096663579	6.86601904536158e-05	0.000300630235256608	UP	putative disease resistance RPP13-like protein 1		molecular function:ADP binding(GO:0043531)	LOC18791073	9.16918666219625	0	0	UP	sugar transport protein 13		biological process:transmembrane transport(GO:0055085); molecular function:transporter activity(GO:0005215); molecular function:transmembrane transporter activity(GO:0022857)	LOC18775948	4.08872274376921
LOC18779995	-3.6508255512882	1.20015298248677e-06	1.62367571857214e-05	DOWN	alpha carbonic anhydrase 7	pper00910:Nitrogen metabolism		LOC18785047	4.94240629810353	0.000696601029348916	0.00187647782335587	UP	protein NSP-INTERACTING KINASE 2			LOC109949776	-5.01656010604598	1.24075163409594e-13	1.24955129107535e-12	DOWN	chlorophyll a-b binding protein CP29.1, chloroplastic	pper00196:Photosynthesis - antenna proteins		LOC18793719	4.78106269612188	0.00754999818299379	0.0279716345929828	UP	putative receptor protein kinase ZmPK1		biological process:multi-organism process(GO:0051704); biological process:cell recognition(GO:0008037); biological process:pollination(GO:0009856); biological process:pollen-pistil interaction(GO:0009875); biological process:multi-multicellular organism process(GO:0044706); biological process:recognition of pollen(GO:0048544); biological process:reproduction(GO:0000003); biological process:reprod…	LOC18786551	6.00544439623071	1.65111771369273e-07	1.02496894531976e-06	UP	non-specific phospholipase C3	pper00565:Ether lipid metabolism; pper00564:Glycerophospholipid metabolism; pper00562:Inositol phosphate metabolism	molecular function:hydrolase activity, acting on ester bonds(GO:0016788)	LOC18777807	9.16425504643159	0	0	UP	uncharacterized LOC18777807			LOC18778790	-4.07588018606963
LOC18786786	3.64613231583047	0.00727162361637067	0.0292911621690372	UP	cytochrome P450 89A2		molecular function:iron ion binding(GO:0005506); molecular function:cofactor binding(GO:0048037); molecular function:oxidoreductase activity, acting on paired donors, with incorporation or reduction of molecular oxygen(GO:0016705); molecular function:heme binding(GO:0020037); molecular function:tetrapyrrole binding(GO:0046906)	LOC18784657	-4.93666983885077	8.91463172047253e-06	3.11753109669833e-05	DOWN	O-glucosyltransferase rumi homolog			LOC109950163	5.00412512260385	0.00289251342528812	0.00842537243878797	UP	uncharacterized LOC109950163			LOC18785199	4.77477676086889	0.00775518473325552	0.0285829819416527	UP	putative RING-H2 finger protein ATL21B		molecular function:carbohydrate binding(GO:0030246); molecular function:pattern binding(GO:0001871); molecular function:polysaccharide binding(GO:0030247)	LOC18775625	6.0038496765529	6.40768401925899e-05	0.000281941096699464	UP	probable mannitol dehydrogenase			LOC18774987	9.16371593199047	7.21043830316556e-14	5.08252058067321e-13	UP	probable linoleate 9S-lipoxygenase 5	pper00591:Linoleic acid metabolism	molecular function:oxidoreductase activity, acting on single donors with incorporation of molecular oxygen(GO:0016701); molecular function:oxidoreductase activity, acting on single donors with incorporation of molecular oxygen, incorporation of two atoms of oxygen(GO:0016702); molecular function:dioxygenase activity(GO:0051213)	LOC18784745	4.06735195539366
LOC18789027	3.64475350556524	1.84356421536814e-05	0.00018528729841863	UP	heavy metal-associated isoprenylated plant protein 32		biological process:metal ion transport(GO:0030001); biological process:ion transport(GO:0006811); biological process:cation transport(GO:0006812)	LOC18768463	-4.93298363780401	0.000764982278161782	0.00204561765281129	DOWN	laccase-15		molecular function:copper ion binding(GO:0005507)	LOC18769570	-5.00377252792868	0.000440309669275753	0.00152249934343726	DOWN	patatin-like protein 3		biological process:lipid metabolic process(GO:0006629)	LOC18786626	4.75610723783292	0.00603540151368627	0.0233271809482698	UP	uncharacterized LOC18786626			LOC18790808	6.00120641763715	2.98296561414102e-28	5.74495949272631e-27	UP	uncharacterized LOC18790808			LOC18790534	9.16073505802561	5.40641188020945e-69	1.31269701540039e-67	UP	transcription factor bHLH92		molecular function:protein dimerization activity(GO:0046983)	LOC18785426	4.0532646642109
LOC18785567	3.62502881666291	0.00155659307236286	0.00824580062224156	UP	RING-H2 finger protein ATL52			LOC18768013	-4.91099114329689	0.00111835684142812	0.00290116568277592	DOWN	G-type lectin S-receptor-like serine/threonine-protein kinase At1g11410		biological process:reproduction(GO:0000003); biological process:reproductive process(GO:0022414); biological process:multi-organism process(GO:0051704); biological process:cell recognition(GO:0008037); biological process:pollination(GO:0009856); biological process:pollen-pistil interaction(GO:0009875); biological process:multi-multicellular organism process(GO:0044706); biological process:recogni…	LOC18778707	4.98118044292524	2.12732380994068e-26	4.25964720580367e-25	UP	patatin-like protein 3		biological process:lipid metabolic process(GO:0006629)	LOC18789806	4.74785806022269	0.00542836845886479	0.0214374755279369	UP	aspartyl protease family protein At5g10770			LOC18771649	5.99516035463886	8.74194809304462e-05	0.000376109861077958	UP	probable aspartyl protease At4g16563			LOC18776937	9.14910953401235	2.76511180019676e-51	5.27663412364935e-50	UP	uncharacterized LOC18776937			LOC18793503	4.05036400701946
LOC18786980	3.62245941513721	0.000953000113849977	0.00549188118853246	UP	1-aminocyclopropane-1-carboxylate oxidase 2			LOC18771658	-4.89968629511826	0.00100113373840012	0.00262112716212896	DOWN	pectinesterase	pper00040:Pentose and glucuronate interconversions	biological process:cell wall modification(GO:0042545); biological process:cell wall organization or biogenesis(GO:0071554); biological process:external encapsulating structure organization(GO:0045229); biological process:cell wall organization(GO:0071555); biological process:cellular component organization or biogenesis(GO:0071840); biological process:cellular component organization(GO:0016043); …	LOC18770379	4.97767085467209	3.31943739510771e-05	0.000140459928514118	UP	chitotriosidase-1	pper00520:Amino sugar and nucleotide sugar metabolism	biological process:carbohydrate metabolic process(GO:0005975); molecular function:hydrolase activity, acting on glycosyl bonds(GO:0016798); molecular function:hydrolase activity, hydrolyzing O-glycosyl compounds(GO:0004553)	LOC18782939	-4.73475781022516	0.0089792447741213	0.0321097359865894	DOWN	uncharacterized LOC18782939			LOC18784641	5.99059130563274	1.18781714545525e-32	2.64229572581329e-31	UP	hydroquinone glucosyltransferase		molecular function:transferase activity, transferring hexosyl groups(GO:0016758); molecular function:transferase activity, transferring glycosyl groups(GO:0016757)	LOC18793716	9.14810638627909	1.57246062544809e-246	1.38148642195164e-244	UP	non-functional NADPH-dependent codeinone reductase 2	pper00999:Biosynthesis of various plant secondary metabolites		LOC18789244	4.02550494099571
LOC18778349	-3.6066563676244	1.59211440045952e-11	4.93213686453623e-10	DOWN	berberine bridge enzyme-like 8		molecular function:flavin adenine dinucleotide binding(GO:0050660); molecular function:cofactor binding(GO:0048037); molecular function:coenzyme binding(GO:0050662); molecular function:oxidoreductase activity, acting on CH-OH group of donors(GO:0016614)	LOC18788574	-4.88372249773216	0.0010704508978186	0.00278618895097678	DOWN	thioredoxin H-type		biological process:regulation of biological quality(GO:0065008); biological process:cellular homeostasis(GO:0019725); biological process:homeostatic process(GO:0042592); biological process:cell redox homeostasis(GO:0045454)	LOC18780376	-4.97151857549204	2.58992556029373e-05	0.000111784021143377	DOWN	photosystem II 5 kDa protein, chloroplastic			LOC18778713	-4.72630395422475	2.34303066941605e-18	1.19414001481098e-16	DOWN	alpha-glucosidase	pper00500:Starch and sucrose metabolism; pper00052:Galactose metabolism	biological process:carbohydrate metabolic process(GO:0005975); molecular function:carbohydrate binding(GO:0030246); molecular function:hydrolase activity, acting on glycosyl bonds(GO:0016798); molecular function:hydrolase activity, hydrolyzing O-glycosyl compounds(GO:0004553)	LOC18784966	5.98853388892921	7.94378403367904e-05	0.000344530014954003	UP	uncharacterized LOC18784966			LOC109949232	9.1426435607929	7.82853911499129e-14	5.50327840530466e-13	UP	uncharacterized LOC109949232			LOC18782622	3.96854475412409
LOC18775691	3.60405127862055	0.000211276722852308	0.00153575726756722	UP	protein LURP-one-related 2			PrpeC_p050	4.87781561630032	4.02812604022554e-13	2.62771844519188e-12	UP			biological process:photosynthesis(GO:0015979); cellular component:photosynthetic membrane(GO:0034357); cellular component:photosystem(GO:0009521); cellular component:thylakoid(GO:0009579); cellular component:thylakoid part(GO:0044436); cellular component:photosystem II(GO:0009523); cellular component:membrane protein complex(GO:0098796)	LOC109950174	4.94327970405604	0.00465177496067736	0.0129014071175036	UP	uncharacterized LOC109950174			LOC18787311	4.72417068989062	4.65123032294389e-11	1.17017586639608e-09	UP	cytochrome P450 77A3	pper00073:Cutin, suberine and wax biosynthesis	molecular function:iron ion binding(GO:0005506); molecular function:heme binding(GO:0020037); molecular function:tetrapyrrole binding(GO:0046906); molecular function:cofactor binding(GO:0048037); molecular function:oxidoreductase activity, acting on paired donors, with incorporation or reduction of molecular oxygen(GO:0016705)	LOC18787408	5.97334663819447	1.0579375926187e-07	6.72280355931498e-07	UP	probable LRR receptor-like serine/threonine-protein kinase At3g47570			LOC18778613	9.13978835192396	2.64638731700571e-15	2.00279649384377e-14	UP	glucose-6-phosphate/phosphate translocator 2, chloroplastic			LOC18789362	3.95608443978759
LOC18779796	3.59655228028835	4.83355759853785e-23	5.04233234541445e-21	UP	premnaspirodiene oxygenase		molecular function:iron ion binding(GO:0005506); molecular function:cofactor binding(GO:0048037); molecular function:oxidoreductase activity, acting on paired donors, with incorporation or reduction of molecular oxygen(GO:0016705); molecular function:heme binding(GO:0020037); molecular function:tetrapyrrole binding(GO:0046906)	LOC18784536	4.87346424624839	0.0181168012199084	0.0366838680659681	UP	ABC transporter C family member 3			PrpeC_p001	-4.9381192737519	1.10147496199576e-05	5.01312322446787e-05	DOWN		pper00195:Photosynthesis	biological process:photosynthesis(GO:0015979); biological process:photosynthesis, light reaction(GO:0019684); biological process:electron transport chain(GO:0022900); biological process:generation of precursor metabolites and energy(GO:0006091); molecular function:electron transfer activity(GO:0009055)	LOC18788873	-4.7188402962841	0.0118658411614217	0.0403474893401277	DOWN	probable pectate lyase 5	pper00040:Pentose and glucuronate interconversions		LOC18768465	5.96869858479237	0.00100764733745629	0.00351601021016631	UP	alcohol dehydrogenase			LOC18789345	9.13579139885489	0	0	UP	acidic mammalian chitinase	pper00520:Amino sugar and nucleotide sugar metabolism	biological process:carbohydrate metabolic process(GO:0005975); molecular function:hydrolase activity, hydrolyzing O-glycosyl compounds(GO:0004553); molecular function:hydrolase activity, acting on glycosyl bonds(GO:0016798)	LOC18769120	-3.94466688570536
LOC18787082	3.58750944194551	3.60811787313856e-26	4.59424832420151e-24	UP	protein ECERIFERUM 1	pper00073:Cutin, suberine and wax biosynthesis	biological process:fatty acid biosynthetic process(GO:0006633); biological process:fatty acid metabolic process(GO:0006631); biological process:monocarboxylic acid biosynthetic process(GO:0072330); biological process:lipid biosynthetic process(GO:0008610); biological process:monocarboxylic acid metabolic process(GO:0032787); biological process:cellular lipid metabolic process(GO:0044255); biologi…	LOC18789048	4.86224626355831	0.0102560816607847	0.0219813573285766	UP	uncharacterized LOC18789048			LOC18793205	-4.9337777018134	3.36614080649705e-164	5.67911280620889e-162	DOWN	probable RNA-dependent RNA polymerase 1		molecular function:5'-3' RNA polymerase activity(GO:0034062); molecular function:RNA polymerase activity(GO:0097747); molecular function:catalytic activity, acting on RNA(GO:0140098); molecular function:nucleotidyltransferase activity(GO:0016779)	LOC18790621	4.70935350223805	0.00899510666677511	0.0321599924184782	UP	heparanase-like protein 2	pper00531:Glycosaminoglycan degradation	molecular function:hydrolase activity, acting on glycosyl bonds(GO:0016798)	LOC18777456	5.94789920856098	1.90772585556523e-08	1.30635784725172e-07	UP	late embryogenesis abundant protein At1g64065			LOC18771087	9.13495606732734	9.70539771010971e-14	6.7859424358345e-13	UP	glucan endo-1,3-beta-glucosidase			LOC18773697	3.94263793748935
LOC18772119	3.57914912416687	1.56317383016194e-29	2.50643344601059e-27	UP	protein HEADING DATE 3A	pper04712:Circadian rhythm - plant		LOC18785587	4.86167071722734	0.00840164850798724	0.0183504514415263	UP	RING-H2 finger protein ATL52			LOC18779401	-4.91170475348274	0.000547044122394256	0.00185615926833893	DOWN	late embryogenesis abundant protein, group 3			LOC18783425	-4.70545477850245	0.00676896475018042	0.0256169310662679	DOWN	putative pectinesterase 63	pper00040:Pentose and glucuronate interconversions	biological process:cell wall organization or biogenesis(GO:0071554); biological process:cell wall modification(GO:0042545); biological process:external encapsulating structure organization(GO:0045229); biological process:cell wall organization(GO:0071555); biological process:cellular component organization(GO:0016043); biological process:cellular component organization or biogenesis(GO:0071840); …	LOC109947431	5.9446595472657	0.00032341651645835	0.00125061926761317	UP	LRR receptor-like serine/threonine-protein kinase GSO1			LOC18788581	9.12769866168351	3.29895838644653e-11	1.99783074312077e-10	UP	uncharacterized LOC18788581			LOC18776873	3.94188547509457
LOC18767369	3.57429971995339	5.052229212622e-06	5.86390437499834e-05	UP	proline-rich protein 4			LOC18780560	4.8523304139178	0.00859420462491574	0.0187315508980202	UP	two-pore potassium channel 1			LOC18783202	4.90119322160437	6.76605071311541e-18	9.07108608587621e-17	UP	cysteine-rich repeat secretory protein 38			LOC18769609	4.6740934519103	9.36198317306064e-129	1.38767995582691e-125	UP	calcium-dependent protein kinase 26	pper04626:Plant-pathogen interaction	molecular function:calcium ion binding(GO:0005509)	LOC18783733	5.94271776779645	0.000256530279314333	0.00101111336973611	UP	inorganic pyrophosphatase 2	pper00750:Vitamin B6 metabolism; pper01240:Biosynthesis of cofactors	molecular function:phosphoric ester hydrolase activity(GO:0042578); molecular function:phosphatase activity(GO:0016791); molecular function:hydrolase activity, acting on ester bonds(GO:0016788)	LOC18786183	9.12211313041571	0	0	UP	UDP-glycosyltransferase 76F1		molecular function:transferase activity, transferring hexosyl groups(GO:0016758); molecular function:transferase activity, transferring glycosyl groups(GO:0016757)	LOC18780812	-3.93900802345678
LOC18789798	3.54341279844322	0.00161637682560396	0.00849493095265063	UP	CRC domain-containing protein TSO1			LOC109950188	4.85195394719485	0.00705644038173156	0.0156952799477784	UP	uncharacterized LOC109950188			LOC109949934	4.85769995434541	0.000847477291346014	0.00276700767283696	UP	uncharacterized LOC109949934			LOC18780620	-4.66966117059276	0.00230978889734975	0.010590922418551	DOWN	2-alkenal reductase (NADP(+)-dependent)			LOC18781301	5.92045813343476	0.00012651336429402	0.000526471487410823	UP	acyl-CoA--sterol O-acyltransferase 1			LOC18786382	9.12182315450464	8.99436471277527e-14	6.3009058808371e-13	UP	rust resistance kinase Lr10		molecular function:carbohydrate binding(GO:0030246); molecular function:pattern binding(GO:0001871); molecular function:polysaccharide binding(GO:0030247)	LOC18767369	3.91932729106928
LOC18791207	3.53281777241756	0.00177490487187045	0.00919689636929402	UP	uncharacterized LOC18791207		biological process:proteolysis(GO:0006508); molecular function:serine-type carboxypeptidase activity(GO:0004185); molecular function:carboxypeptidase activity(GO:0004180); molecular function:serine-type exopeptidase activity(GO:0070008); molecular function:exopeptidase activity(GO:0008238); molecular function:serine-type peptidase activity(GO:0008236); molecular function:serine hydrolase activity…	LOC109946372	-4.84947082119335	0.00106778715213077	0.00278003138393857	DOWN	uncharacterized LOC109946372		biological process:DNA integration(GO:0015074); biological process:DNA metabolic process(GO:0006259)	LOC18789735	-4.85510035554974	0.000718725385191365	0.00237566319263343	DOWN	probable calcium-binding protein CML45	pper04016:MAPK signaling pathway - plant; pper04626:Plant-pathogen interaction; pper04070:Phosphatidylinositol signaling system	molecular function:calcium ion binding(GO:0005509)	LOC18766656	-4.66598240165867	0	0	DOWN	protein SULFUR DEFICIENCY-INDUCED 1			LOC18776330	5.91628022259849	1.52333741176806e-108	1.53947168435507e-106	UP	glutathione S-transferase U10	pper00480:Glutathione metabolism		LOC18780378	9.11927479107253	8.79286248967354e-14	6.16925143662048e-13	UP	glutamate receptor 2.8		molecular function:transporter activity(GO:0005215); molecular function:transmembrane transporter activity(GO:0022857); molecular function:ion channel activity(GO:0005216); molecular function:channel activity(GO:0015267); molecular function:passive transmembrane transporter activity(GO:0022803); molecular function:substrate-specific channel activity(GO:0022838); molecular function:transmembrane s…	LOC18767587	3.86419073056653
LOC18773980	3.53197944966505	0.00168301907263235	0.00878915599540845	UP	non-specific lipid-transfer protein			LOC18770991	4.84275762421747	0.00809156710148268	0.0177458995430072	UP	probable polygalacturonase At1g80170	pper00040:Pentose and glucuronate interconversions	biological process:carbohydrate metabolic process(GO:0005975); molecular function:hydrolase activity, acting on glycosyl bonds(GO:0016798); molecular function:hydrolase activity, hydrolyzing O-glycosyl compounds(GO:0004553); molecular function:polygalacturonase activity(GO:0004650)	LOC18772596	4.85424006270248	5.84867143624417e-05	0.000237458568676675	UP	pathogenesis-related protein PR-4-like		biological process:response to biotic stimulus(GO:0009607); biological process:defense response(GO:0006952); biological process:response to stress(GO:0006950); biological process:multi-organism process(GO:0051704); biological process:response to external stimulus(GO:0009605)	LOC18773980	4.66394448599331	2.4462132657479e-06	2.80172539329414e-05	UP	non-specific lipid-transfer protein			LOC18785351	5.91035858321119	0	0	UP	omega-3 fatty acid desaturase, chloroplastic		biological process:lipid metabolic process(GO:0006629); molecular function:oxidoreductase activity, acting on paired donors, with incorporation or reduction of molecular oxygen(GO:0016705)	LOC18783477	9.10523825609564	2.20662610414899e-13	1.51147654727132e-12	UP	UPF0481 protein At3g47200			LOC18778002	3.84014498687863
LOC18770089	3.52016444326403	9.86361678339636e-07	1.36102192699661e-05	UP	strigolactone esterase D14			PrpeC_p049	4.83400592219326	1.0656518879711e-34	1.61247909763802e-33	UP		pper00195:Photosynthesis	biological process:photosynthesis(GO:0015979); cellular component:photosynthetic membrane(GO:0034357); cellular component:photosystem(GO:0009521); cellular component:thylakoid(GO:0009579); cellular component:thylakoid part(GO:0044436); cellular component:photosystem II(GO:0009523); cellular component:membrane protein complex(GO:0098796)	LOC18785981	-4.80770187529053	0.00660787416029267	0.0176320350284039	DOWN	BON1-associated protein 2			LOC18780795	4.66313027847161	0.00852860223696945	0.0308016747185737	UP	stigma-specific STIG1-like protein 3			LOC18791043	-5.90059834920374	7.00790748614026e-06	3.58637726700186e-05	DOWN	plant intracellular Ras-group-related LRR protein 6			LOC18781346	9.10264058748507	0	0	UP	polyphenol oxidase, chloroplastic	pper00950:Isoquinoline alkaloid biosynthesis; pper00350:Tyrosine metabolism	molecular function:oxidoreductase activity, acting on diphenols and related substances as donors(GO:0016679)	LOC18779796	3.83145544210826
LOC109950542	-3.48898307957037	1.42469197362929e-19	1.14750655382969e-17	DOWN	classical arabinogalactan protein 9-like			LOC18790583	4.83316493681583	0.00739818042965501	0.0163753532181841	UP	VIN3-like protein 2			LOC18777058	4.79675196281497	1.23648662527388e-06	6.41196959667281e-06	UP	ethylene-responsive transcription factor ERF113		molecular function:transcription regulator activity(GO:0140110); molecular function:DNA-binding transcription factor activity(GO:0003700)	LOC18767074	4.6564770208374	0.00790034235841345	0.0289679219808493	UP	putative UDP-glucose glucosyltransferase		molecular function:transferase activity, transferring hexosyl groups(GO:0016758); molecular function:transferase activity, transferring glycosyl groups(GO:0016757)	LOC18788734	5.89463580310997	0.000130401191461614	0.000541571187782581	UP	probably inactive leucine-rich repeat receptor-like protein kinase At3g28040			LOC109950268	9.10078702433806	8.9523852914329e-265	8.4795874432291e-263	UP	major allergen Pru ar 1-like		biological process:response to biotic stimulus(GO:0009607); biological process:defense response(GO:0006952); biological process:response to stress(GO:0006950)	LOC18776508	3.82853798445263
LOC18776064	3.4862153861384	0.00060032375464718	0.00375571042602067	UP	random slug protein 5			LOC18785270	4.83280823958819	0.00829338016280537	0.018150098967444	UP	annexin-like protein RJ4		molecular function:calcium ion binding(GO:0005509); molecular function:phospholipid binding(GO:0005543); molecular function:lipid binding(GO:0008289)	LOC18789400	-4.79639470209876	6.62326526785879e-05	0.000266746490579801	DOWN	IAA-amino acid hydrolase ILR1-like 1			LOC18782320	4.6514709380105	0.000177972593748935	0.00121101703328704	UP	cinnamoyl-CoA reductase-like SNL6		biological process:lipid biosynthetic process(GO:0008610); biological process:lipid metabolic process(GO:0006629); biological process:steroid biosynthetic process(GO:0006694); biological process:steroid metabolic process(GO:0008202); molecular function:oxidoreductase activity, acting on CH-OH group of donors(GO:0016614); molecular function:oxidoreductase activity, acting on the CH-OH group of don…	LOC18793155	5.89382651450302	3.7867333850378e-158	8.08854857256312e-156	UP	probable receptor-like protein kinase At3g17420			LOC18790058	9.09582507264936	2.46094118869934e-233	2.07197576192991e-231	UP	major allergen Pru ar 1		biological process:response to biotic stimulus(GO:0009607); biological process:defense response(GO:0006952); biological process:response to stress(GO:0006950)	LOC18791152	-3.7756807583062
LOC18767222	3.48527262098487	6.21084949357361e-11	1.78957205790706e-09	UP	ABC transporter G family member 11	pper02010:ABC transporters	molecular function:ATPase activity(GO:0016887); molecular function:nucleoside-triphosphatase activity(GO:0017111); molecular function:pyrophosphatase activity(GO:0016462); molecular function:hydrolase activity, acting on acid anhydrides, in phosphorus-containing anhydrides(GO:0016818); molecular function:hydrolase activity, acting on acid anhydrides(GO:0016817)	LOC109948226	4.83185884508191	0.0148168156183487	0.0307084346802411	UP	uncharacterized LOC109948226			PrpeC_p053	-4.77924511488985	1.09637873498613e-05	4.9912619941661e-05	DOWN		pper00195:Photosynthesis	molecular function:electron transfer activity(GO:0009055)	LOC18772705	4.64933470338762	0.00771006097136473	0.0284343467753814	UP	arabinogalactan peptide 23			LOC18785473	5.88834933562473	8.5238454197951e-18	1.07100750237893e-16	UP	probable LRR receptor-like serine/threonine-protein kinase MEE39			LOC18783171	9.07579480877886	0	0	UP	linoleate 13S-lipoxygenase 3-1, chloroplastic	pper00592:alpha-Linolenic acid metabolism; pper00591:Linoleic acid metabolism	molecular function:oxidoreductase activity, acting on single donors with incorporation of molecular oxygen(GO:0016701); molecular function:oxidoreductase activity, acting on single donors with incorporation of molecular oxygen, incorporation of two atoms of oxygen(GO:0016702); molecular function:dioxygenase activity(GO:0051213)	LOC18778713	-3.74521210782105
LOC18771166	3.48479875452861	4.86585087843342e-07	7.12875970066257e-06	UP	dynamin-related protein 4C		molecular function:nucleoside-triphosphatase activity(GO:0017111); molecular function:pyrophosphatase activity(GO:0016462); molecular function:hydrolase activity, acting on acid anhydrides, in phosphorus-containing anhydrides(GO:0016818); molecular function:hydrolase activity, acting on acid anhydrides(GO:0016817); molecular function:GTPase activity(GO:0003924); molecular function:purine nucleosi…	LOC18788237	4.81852906501025	1.67506844365218e-13	1.12013447860999e-12	UP	BURP domain protein RD22			LOC18767691	-4.77411003161158	0.00111915600360234	0.00357324682431777	DOWN	inositol-tetrakisphosphate 1-kinase 3	pper00562:Inositol phosphate metabolism; pper04070:Phosphatidylinositol signaling system	biological process:polyol metabolic process(GO:0019751); biological process:alcohol metabolic process(GO:0006066); biological process:organic hydroxy compound metabolic process(GO:1901615); biological process:organophosphate metabolic process(GO:0019637); biological process:small molecule metabolic process(GO:0044281); molecular function:magnesium ion binding(GO:0000287)	LOC18784433	-4.63508224291579	0.0152712484649885	0.0491270608368144	DOWN	thionin-like protein 2			LOC18767671	5.8840087594353	4.88199549767436e-29	9.65967045997736e-28	UP	pentatricopeptide repeat-containing protein At4g32430, mitochondrial			LOC18776330	9.05811213676158	1.42710576087822e-42	2.34024755341129e-41	UP	glutathione S-transferase U10	pper00480:Glutathione metabolism		LOC18770886	3.74323538029404
LOC109949085	-3.47857511786447	9.82181198666142e-34	2.02481331158352e-31	DOWN	uncharacterized LOC109949085			LOC18789944	-4.78330178118934	8.70990022108413e-09	4.10769990962504e-08	DOWN	uncharacterized LOC18789944			LOC18792793	4.75753502252723	0.00793221282286501	0.0207850079196709	UP	protein SIEVE ELEMENT OCCLUSION A			LOC18771849	4.62739168010034	3.3368805846496e-09	6.50801479815378e-08	UP	uncharacterized LOC18771849			LOC18767097	5.87693873973988	0.00145255706900795	0.00489928498585006	UP	AT-hook motif nuclear-localized protein 25			LOC18790500	9.05610904957438	8.3992306590819e-16	6.48613200705152e-15	UP	1-aminocyclopropane-1-carboxylate oxidase homolog 1			LOC109947796	3.71150136566973
LOC18769313	3.45204117304159	9.65281331390526e-05	0.000786624791326576	UP	uncharacterized LOC18769313			PrpeC_p016	4.7692248619107	2.78525305981217e-157	2.36202119713253e-155	UP		pper00195:Photosynthesis	biological process:photosynthesis(GO:0015979); biological process:photosynthesis, light reaction(GO:0019684); biological process:electron transport chain(GO:0022900); biological process:generation of precursor metabolites and energy(GO:0006091); molecular function:electron transfer activity(GO:0009055)	LOC18788093	4.74802365118552	0.00846835815228504	0.0220104976990447	UP	transcription factor MYB108			LOC109948830	4.62698346101373	0.00236244881449807	0.0107607879804039	UP	BAHD acyltransferase At5g47980-like		molecular function:transferase activity, transferring acyl groups other than amino-acyl groups(GO:0016747); molecular function:transferase activity, transferring acyl groups(GO:0016746)	LOC18791610	5.86312168451275	0.00135627591389451	0.00460345221261739	UP	protein SIEVE ELEMENT OCCLUSION B			LOC18772845	9.05367937344494	3.17299097294289e-136	1.4039906042321e-134	UP	probable WRKY transcription factor 33	pper04626:Plant-pathogen interaction; pper04016:MAPK signaling pathway - plant	molecular function:DNA-binding transcription factor activity(GO:0003700); molecular function:transcription regulator activity(GO:0140110); molecular function:sequence-specific DNA binding(GO:0043565)	LOC18771335	3.71010917034903
LOC18792229	3.44824468572476	3.03721427284148e-06	3.75681711162828e-05	UP	uncharacterized LOC18792229			LOC18793670	-4.75686522100594	0.00191741450222391	0.00476340910359406	DOWN	BTB/POZ domain-containing protein At4g08455			LOC18781958	-4.74136223612398	1.52163121043241e-13	1.52431486336087e-12	DOWN	glutamate decarboxylase 1	pper00250:Alanine, aspartate and glutamate metabolism; pper00650:Butanoate metabolism; pper00410:beta-Alanine metabolism	biological process:small molecule metabolic process(GO:0044281); biological process:carboxylic acid metabolic process(GO:0019752); biological process:oxoacid metabolic process(GO:0043436); biological process:organic acid metabolic process(GO:0006082); molecular function:cofactor binding(GO:0048037); molecular function:lyase activity(GO:0016829); molecular function:carbon-carbon lyase activity(GO:…	LOC18775476	-4.62666207504297	0.0153515881443472	0.0493226445421197	DOWN	1-aminocyclopropane-1-carboxylate synthase	pper00270:Cysteine and methionine metabolism	molecular function:cofactor binding(GO:0048037); molecular function:vitamin binding(GO:0019842); molecular function:coenzyme binding(GO:0050662); molecular function:pyridoxal phosphate binding(GO:0030170); molecular function:vitamin B6 binding(GO:0070279)	LOC18791602	5.83901170563366	0.00164306027892136	0.00547405247481121	UP	boron transporter 4		biological process:ion transport(GO:0006811); biological process:anion transport(GO:0006820)	LOC18788223	9.04951540604466	0	0	UP	major allergen Pru ar 1		biological process:response to biotic stimulus(GO:0009607); biological process:defense response(GO:0006952); biological process:response to stress(GO:0006950)	LOC18775681	3.70870774102047
LOC18785452	3.43765072533457	0.000506976363731537	0.00325883804407536	UP	BAHD acyltransferase DCR		molecular function:transferase activity, transferring acyl groups other than amino-acyl groups(GO:0016747); molecular function:transferase activity, transferring acyl groups(GO:0016746)	LOC18790271	4.75310109198531	0	0	UP	gamma-glutamylcyclotransferase 2-1	pper00480:Glutathione metabolism		LOC18775056	-4.72256313279034	0.0011940889131128	0.00379542530860701	DOWN	probable linoleate 9S-lipoxygenase 5	pper00591:Linoleic acid metabolism	molecular function:oxidoreductase activity, acting on single donors with incorporation of molecular oxygen(GO:0016701); molecular function:oxidoreductase activity, acting on single donors with incorporation of molecular oxygen, incorporation of two atoms of oxygen(GO:0016702); molecular function:dioxygenase activity(GO:0051213)	LOC18784588	4.60749521564288	2.49499820771733e-10	5.62890111944518e-09	UP	protein ENHANCED DISEASE RESISTANCE 2		molecular function:lipid binding(GO:0008289)	LOC18771408	5.81807835054533	2.46100900650386e-22	3.76706728788705e-21	UP	probable galacturonosyltransferase-like 1		molecular function:transferase activity, transferring glycosyl groups(GO:0016757)	LOC18775352	9.04616991676138	1.96413268215495e-51	3.75997020607052e-50	UP	uncharacterized LOC18775352			LOC18789027	3.70579541327067
LOC18791588	3.43208665977359	0.00044966836991394	0.00293845553275461	UP	cytochrome P450 CYP82D47		molecular function:iron ion binding(GO:0005506); molecular function:cofactor binding(GO:0048037); molecular function:oxidoreductase activity, acting on paired donors, with incorporation or reduction of molecular oxygen(GO:0016705); molecular function:heme binding(GO:0020037); molecular function:tetrapyrrole binding(GO:0046906)	LOC18772972	-4.74038743410391	0.00165314448608411	0.00415670036076431	DOWN	beta-1,6-galactosyltransferase GALT29A		biological process:glycosylation(GO:0070085); biological process:carbohydrate derivative metabolic process(GO:1901135); biological process:protein glycosylation(GO:0006486); biological process:macromolecule glycosylation(GO:0043413); biological process:glycoprotein metabolic process(GO:0009100); biological process:glycoprotein biosynthetic process(GO:0009101); biological process:carbohydrate deri…	LOC18789283	4.71826387861261	0.00783351199614965	0.020574886900608	UP	uncharacterized protein At4g14100			LOC109948160	-4.60573317942993	0.000196546887071987	0.00131824263964911	DOWN	protein DJ-1 homolog D-like	pper00620:Pyruvate metabolism		LOC18769049	5.8170010046098	1.60061430109732e-246	1.25361445907193e-243	UP	late embryogenesis abundant protein At1g64065			LOC18784729	9.04151376615445	2.37370095778827e-18	2.06546055590132e-17	UP	uncharacterized LOC18784729			LOC18767070	3.70244067505502
[truncated: 3,428 more rows]
[truncated: 22 more columns]

## Sheet: Table S4
Table S4: DEGs involved in cell wall modification and modification. DEGs induced in peach fruits among three different comparison groups (CHI–CT, MF–CT, CHI_MF–CT) at 12, 24 and 48 HAI; CHI: chitosan treated fruits, MF: Monilinia fructicola inoculated fruits, CHI_MF: chitosan pre-treated and Monilinia fructicola inoculated fruits, CT: untreated - mock inoculated fruits
[truncated: 176 more rows]

[truncated: 6 more sheets: Table S5, Table S6, Table S7, Table S8, Table S9, Table S10]
